# Supplementary material for: Comprehensive Genomic and Transcriptomic Analysis for Guiding Therapeutic Decisions in Patients with Rare Cancers
Source: Oxford University Press journal article supplement (doi:10.1158/2159-8290.cd-21-0126), 2021-06-10
Supplement: 21598290cd210126-sup-259817_2_supp_7131694_qtgh5g.xlsx [file 21598290cd210126-sup-259817_2_supp_7131694_qtgh5g.xlsx]

## Sheet: Supplementary Table S1
Supplementary Table S1. Patient subgroups considered in this study
Subgroup	Number of patients	Comment
Registered and assessed for eligibility	2,340
Sequencing data available	1,484
Discussed in the molecular tumor board	1,310	Of the 1,310 patients, 31 and two were analyzed twice or three times, respectively, and one had two independent tumors, resulting in 1,345 molecular tumor board discussions.
Recommendation for clinical management	1,155
Treatment recommendation	1,138
Discussed in the molecular tumor board since August 2015	1,097
Treatment implemented	362
Evaluable for progression-free survival ratio	300
Evaluable for best response 2	251
Evaluable for best response comparison	181
Recommendation for genetic counseling	163
Recommendation for histologic reevaluation	58

## Sheet: Supplementary Table S2
Supplementary Table S2. Actionable genes
Gene	SNV	Indel	Germline SNV	Germline indel	Amplification	Focal gain	Gain	Gain and overexpression	Homozygous loss	Focal loss	Loss	Loss and underexpression	Fusion	Structural variant	Extreme overexpression	Extreme underexpression	Overexpression	Underexpression
ABCB1	1	1	1	1	0	0	0	1	0	0	0	0	0	0	1	0	0	0
ABCB5	1	1	0	0	1	0	0	1	0	0	0	0	0	0	1	0	0	0
ABL1	1	1	1	1	1	1	0	1	0	0	0	0	1	1	1	0	0	0
ABL2	1	1	1	1	1	1	0	1	0	0	0	0	1	1	1	0	0	0
ADORA2A	0	0	0	0	1	0	0	1	0	0	0	0	0	0	1	0	0	0
AIP	1	1	1	1	0	0	0	0	0	0	0	0	0	0	0	0	0	0
AKT1	1	1	1	1	1	1	0	1	0	0	0	0	1	1	1	0	0	0
AKT2	1	1	1	1	1	1	0	1	0	0	0	0	1	1	1	0	0	0
AKT3	1	1	1	1	1	1	0	1	0	0	0	0	1	1	1	0	0	0
ALK	1	1	1	1	1	1	0	1	0	0	0	0	1	1	1	0	0	0
AML1	1	1	1	1	0	0	0	0	0	0	0	0	0	0	0	0	0	0
APC	1	1	1	1	0	0	0	0	1	1	0	1	1	1	0	1	0	0
AR	1	1	1	1	1	1	0	1	0	0	0	0	1	1	1	0	0	0
ARAF	1	1	1	1	1	1	0	1	0	0	0	0	1	1	1	0	0	0
ARHGAP26	0	0	0	0	0	0	0	0	0	0	0	0	1	1	0	0	0	0
ARHGAP6	0	0	0	0	0	0	0	0	0	0	0	0	1	1	0	0	0	0
ARHGEF12	0	0	0	0	0	0	0	0	0	0	0	0	1	1	0	0	0	0
ARID1A	1	1	1	1	0	0	0	0	1	1	0	1	1	1	0	1	0	0
ASCL1	0	0	0	0	0	0	0	0	0	0	0	0	0	0	1	0	0	0
ASPSCR1	0	0	0	0	0	0	0	0	0	0	0	0	1	1	0	0	0	0
ATM	1	1	1	1	0	0	0	0	1	1	0	1	1	1	0	1	0	0
ATR	1	1	1	1	0	0	0	0	1	1	0	1	1	1	0	1	0	0
ATRX	1	1	1	1	0	0	0	0	1	1	0	1	1	1	0	1	0	0
AURKA	1	1	1	1	1	1	0	1	0	0	0	0	1	1	1	0	0	0
AURKC	0	0	0	0	0	0	0	1	0	0	0	0	0	0	1	0	0	0
AXL	1	1	1	1	1	1	0	1	0	0	0	0	1	1	1	0	0	0
B2M	1	1	1	1	0	0	0	0	0	0	0	0	0	0	0	0	0	0
BAP1	1	1	1	1	0	0	0	0	1	1	0	1	1	1	0	1	0	0
BARD1	1	1	1	1	0	0	0	0	0	1	0	1	1	1	0	1	0	0
BCL2	1	1	1	1	1	1	0	1	0	0	0	0	1	1	1	0	0	0
BCL3	1	1	1	1	1	1	0	1	0	0	0	0	1	1	1	0	0	0
BCL5	1	1	1	1	1	1	0	1	0	0	0	0	1	1	1	0	0	0
BCL6	1	1	1	1	1	1	0	1	0	0	0	0	1	1	1	0	0	0
BCL9	1	1	1	1	1	1	0	1	0	0	0	0	1	1	1	0	0	0
BCOR	1	1	0	0	0	0	0	0	0	0	0	0	1	1	0	0	0	0
BLM	1	1	1	1	0	0	0	0	0	1	0	1	1	1	0	1	0	0
BMPR1A	1	1	1	1	0	0	0	0	0	0	0	0	0	0	0	0	0	0
BRAF	1	1	1	1	1	1	0	1	0	0	0	0	1	1	1	0	0	0
BRCA1	1	1	1	1	0	0	0	0	1	1	0	1	1	1	0	1	0	0
BRCA2	1	1	1	1	0	0	0	0	1	1	0	1	1	1	0	1	0	0
BRD2	1	1	1	1	1	1	0	1	0	0	0	0	1	1	1	0	0	0
BRD3	1	1	1	1	1	1	0	1	0	0	0	0	1	1	1	0	0	0
BRD4	1	1	1	1	1	1	0	1	0	0	0	0	1	1	1	0	0	0
BRIP1	1	1	1	1	0	0	0	0	1	1	0	1	1	1	0	1	0	0
BTK	1	1	1	1	1	1	0	1	0	0	0	0	1	1	1	0	0	0
BUB1B	1	1	1	1	0	0	0	0	0	1	0	1	1	1	0	1	0	0
CAMTA1	0	0	0	0	0	0	0	0	0	0	0	0	1	1	0	0	0	0
CARD11	1	1	1	1	0	0	0	0	0	0	0	0	1	1	0	0	0	0
CBFA2	1	1	1	1	0	0	0	0	0	0	0	0	0	0	0	0	0	0
CBL	1	1	1	1	0	0	0	0	0	0	0	0	0	0	0	0	0	0
CCND1	1	1	1	1	1	1	0	1	0	0	0	0	1	1	1	0	0	0
CCND2	1	1	1	1	1	1	0	1	0	0	0	0	1	1	1	0	0	0
CCND3	1	1	1	1	1	1	0	1	0	0	0	0	1	1	1	0	0	0
CCNE1	1	1	1	1	1	1	0	1	0	0	0	0	1	1	1	0	0	0
CCR2	0	0	0	0	1	0	0	1	0	0	0	0	0	0	1	0	0	0
CCR4	0	0	0	0	0	0	0	1	0	0	0	0	0	0	1	0	0	0
CCR5	0	0	0	0	1	0	0	1	0	0	0	0	0	0	1	0	0	0
CD116	0	0	0	0	1	0	0	1	0	0	0	0	0	0	1	0	0	0
CD19	0	0	0	0	1	0	0	1	0	0	0	0	0	0	1	0	0	0
CD27	0	0	0	0	0	0	0	0	0	0	0	1	0	0	0	1	0	0
CD273	0	0	0	0	0	0	0	0	0	0	0	0	0	0	0	0	1	1
CD274	0	0	0	0	0	0	0	0	0	0	0	0	0	0	0	0	1	1
CD276	0	0	0	0	0	0	0	1	0	0	0	0	0	0	1	0	0	0
CD40	0	0	0	0	0	0	0	0	0	0	0	1	0	0	0	1	0	0
CD5	0	0	0	0	0	0	0	1	0	0	0	0	0	0	1	0	0	0
CD70	0	0	0	0	0	0	0	0	0	0	0	1	0	0	0	1	0	0
CD73	0	0	0	0	0	0	0	1	0	0	0	0	0	0	1	0	0	0
CD79B	1	1	1	1	0	0	0	0	0	0	0	0	1	1	0	0	0	0
CD99	0	0	0	0	0	0	0	1	0	0	0	0	0	0	1	0	0	0
CDC73	1	1	1	1	0	0	0	0	0	1	0	1	1	1	0	1	0	0
CDH1	1	1	1	1	0	0	0	0	0	0	0	0	0	0	0	0	0	0
CDH17	1	1	1	1	0	0	0	0	0	0	0	0	0	0	0	0	0	0
CDK1	1	1	1	1	1	1	0	1	0	1	0	1	1	1	1	1	0	0
CDK12	1	1	1	1	0	0	0	0	0	1	0	1	1	1	0	1	0	0
CDK2	1	1	1	1	1	1	0	1	0	0	0	0	1	1	1	0	0	0
CDK4	1	1	1	1	1	1	0	1	0	0	0	0	1	1	1	0	0	0
CDK5	1	1	1	1	1	1	0	1	0	0	0	0	1	1	1	0	0	0
CDK6	1	1	1	1	1	1	0	1	0	0	0	0	1	1	1	0	0	0
CDK9	1	1	1	1	1	1	0	1	0	0	0	0	1	1	1	0	0	0
CDKN1A	1	1	1	1	0	0	0	0	0	1	0	1	1	1	0	1	0	0
CDKN1B	1	1	1	1	0	0	0	0	0	1	0	1	1	1	0	1	0	0
CDKN1C	1	1	1	1	0	0	0	0	0	0	0	0	0	0	0	0	0	0
CDKN2A	1	1	1	1	0	0	0	0	1	1	0	1	1	1	0	1	0	0
CDKN2B	1	1	1	1	0	0	0	0	1	1	0	1	1	1	0	1	0	0
CDKN2C	1	1	1	1	0	0	0	0	0	1	0	1	1	1	0	1	0	0
CDKN2D	1	1	1	1	0	0	0	0	0	0	0	0	0	0	0	0	0	0
CEBPA	1	1	1	1	0	0	0	0	0	0	0	0	0	0	0	0	0	0
CEP57	1	1	1	1	0	0	0	0	0	0	0	0	0	0	0	0	0	0
CHEK1	1	1	1	1	0	0	0	0	1	1	0	1	1	1	0	1	0	0
CHEK2	1	1	1	1	0	0	0	0	1	1	0	1	1	1	0	1	0	0
CIC	0	0	0	0	0	0	0	0	0	0	0	0	1	1	0	0	0	0
CLDN18	0	0	0	0	0	0	0	0	0	0	0	0	0	0	0	0	1	0
CLDN6	0	0	0	0	0	0	0	1	0	0	0	0	0	0	1	0	0	0
CREBBP	1	1	1	1	0	0	0	0	0	1	0	0	1	1	0	0	0	0
CREBRF	1	1	1	1	0	0	0	0	0	1	0	1	1	1	0	1	0	0
CRKL	1	1	1	1	1	1	0	1	0	0	0	0	1	1	1	0	0	0
CRTC1	0	0	0	0	0	0	0	0	0	0	0	0	1	1	0	0	0	0
CSF1R	1	1	1	1	1	1	0	1	0	0	0	0	1	1	1	0	0	0
CSF2RA	0	0	0	0	1	0	0	1	0	0	0	0	0	0	1	0	0	0
CSF3R	0	0	0	0	0	0	0	1	0	0	0	0	0	0	1	0	0	0
CTAG1B	0	0	0	0	0	0	0	0	0	0	0	0	0	0	0	0	1	0
CTLA4	0	0	0	0	0	0	0	0	0	0	0	0	0	0	0	0	1	1
CTNNB1	1	1	1	1	1	1	0	1	0	0	0	0	1	1	1	0	0	0
CXCL12	0	0	0	0	0	0	0	1	0	0	0	0	0	0	1	0	0	0
CXCR4	0	0	0	0	0	0	0	1	0	0	0	0	0	0	1	0	0	0
CYLD	1	1	1	1	0	0	0	0	0	0	0	0	0	0	0	0	0	0
CYP3A5	0	0	0	0	0	0	0	1	0	0	0	0	0	0	1	0	0	0
DAXX	1	1	1	1	0	0	0	0	0	1	0	1	1	1	0	1	0	0
DDB1	1	1	1	1	0	0	0	0	1	1	0	1	1	1	0	1	0	0
DDB2	1	1	1	1	0	0	0	0	0	1	0	1	1	1	0	1	0	0
DDIT3	0	0	0	0	0	0	0	0	0	0	0	0	1	1	0	0	0	0
DDR1	1	1	1	1	1	1	0	1	0	0	0	0	1	1	1	0	0	0
DDR2	1	1	1	1	1	1	0	1	0	0	0	0	1	1	1	0	0	0
DICER1	1	1	1	1	0	0	0	0	0	1	0	1	1	1	0	1	0	0
DIS3L2	1	1	1	1	0	0	0	0	0	0	0	0	0	0	0	0	0	0
DLEU1	1	1	1	1	0	0	0	0	0	0	0	0	1	1	0	0	0	0
DLL3	0	0	0	0	0	0	0	0	0	0	0	0	0	0	1	0	0	0
DNMT3A	1	1	1	1	0	0	0	0	0	1	0	1	1	1	0	1	0	0
DOT1L	0	0	0	0	1	1	0	0	0	0	0	0	1	1	1	0	0	0
DUX4	0	0	0	0	0	0	0	0	0	0	0	0	1	1	0	0	0	0
EGF	1	1	1	1	1	1	0	1	0	0	0	0	1	1	1	0	0	0
EGFL7	0	0	0	0	0	0	0	1	0	0	0	0	0	0	1	0	0	0
EGFR	1	1	1	1	1	1	0	1	0	0	0	0	1	1	1	0	0	0
EGLN1	1	1	1	1	0	0	0	0	0	0	0	0	0	0	0	0	0	0
EGLN2	1	1	1	1	0	0	0	0	0	0	0	0	0	0	0	0	0	0
EHBP1	1	1	1	1	0	0	0	0	0	0	0	0	0	0	0	0	0	0
ELK2AP	0	0	0	0	0	0	0	0	0	0	0	0	1	1	0	0	0	0
EP300	1	1	1	1	0	0	0	0	0	1	0	1	1	1	0	1	0	0
EPAS1	1	1	1	1	0	0	0	0	0	0	0	0	0	0	0	0	0	0
EPCAM	1	1	1	1	0	0	0	0	0	0	0	0	0	0	0	0	0	0
EPHA3	1	1	1	1	1	1	0	1	0	0	0	0	1	1	1	0	0	0
EPHA5	1	1	1	1	1	1	0	1	0	0	0	0	1	1	1	0	0	0
EPHB2	1	1	1	1	0	0	0	0	0	0	0	0	0	0	0	0	0	0
ERBB2	1	1	1	1	1	1	0	1	0	0	0	0	1	1	1	0	0	0
ERBB3	1	1	1	1	1	1	0	1	0	0	0	0	1	1	1	0	0	0
ERBB4	1	1	1	1	1	1	0	1	0	0	0	0	1	1	1	0	0	0
ERCC1	1	1	1	1	0	0	0	0	1	1	0	1	1	1	0	1	0	0
ERCC2	1	1	1	1	0	0	0	0	1	1	0	1	1	1	0	1	0	0
ERCC3	1	1	1	1	0	0	0	0	1	1	0	1	1	1	0	1	0	0
ERCC4	1	1	1	1	0	0	0	0	1	1	0	1	1	1	0	1	0	0
ERCC5	1	1	1	1	0	0	0	0	1	1	0	1	1	1	0	1	0	0
ERCC6	1	1	1	1	0	0	0	0	1	1	0	1	1	1	0	1	0	0
ERG	0	0	0	0	0	0	0	0	0	0	0	0	1	1	0	0	0	0
ERRFI1	1	1	1	1	0	0	0	0	0	1	0	1	1	1	0	1	0	0
ESR1	1	1	1	1	1	1	0	1	0	0	0	0	1	1	1	0	0	0
ETS1	0	0	0	0	0	0	0	1	0	0	0	0	0	0	1	0	0	0
EWSR1	0	0	0	0	0	0	0	0	0	0	0	0	1	1	0	0	0	0
EXT1	1	1	1	1	0	0	0	0	0	0	0	0	0	0	0	0	0	0
EXT2	1	1	1	1	0	0	0	0	0	0	0	0	0	0	0	0	0	0
EZH2	1	1	1	1	1	1	0	0	0	0	0	0	0	0	1	0	0	0
FAM175A	1	1	1	1	0	0	0	0	0	0	0	0	0	0	0	0	0	0
FAM30A	0	0	0	0	0	0	0	0	0	0	0	0	1	1	0	0	0	0
FANCA	1	1	1	1	0	0	0	0	1	1	0	1	1	1	0	1	0	0
FANCB	1	1	1	1	0	0	0	0	1	1	0	1	1	1	0	1	0	0
FANCC	1	1	1	1	0	0	0	0	1	1	0	1	1	1	0	1	0	0
FANCD1	1	1	1	1	0	0	0	0	1	1	0	1	1	1	0	1	0	0
FANCD2	1	1	1	1	0	0	0	0	1	1	0	1	1	1	0	1	0	0
FANCE	1	1	1	1	0	0	0	0	1	1	0	1	1	1	0	1	0	0
FANCF	1	1	1	1	0	0	0	0	1	1	0	1	1	1	0	1	0	0
FANCG	1	1	1	1	0	0	0	0	1	1	0	1	1	1	0	1	0	0
FANCI	1	1	1	1	0	0	0	0	1	1	0	1	1	1	0	1	0	0
FANCJ	1	1	1	1	0	0	0	0	1	1	0	1	1	1	0	1	0	0
FANCL	1	1	1	1	0	0	0	0	1	1	0	1	1	1	0	1	0	0
FANCM	1	1	1	1	0	0	0	0	0	0	0	0	0	0	0	0	0	0
FANCN	1	1	1	1	0	0	0	0	1	1	0	1	1	1	0	1	0	0
FANCP	1	1	1	1	0	0	0	0	1	1	0	1	1	1	0	1	0	0
FAS	1	1	1	1	1	1	0	1	0	0	0	0	1	1	1	0	0	0
FASLG	1	1	1	1	1	1	0	1	0	0	0	0	1	1	1	0	0	0
FBXW7	1	1	1	1	0	0	0	0	1	1	0	1	1	1	0	1	0	0
FGF1	1	1	1	1	1	1	0	1	0	0	0	0	1	1	1	0	0	0
FGF2	1	1	1	1	1	1	0	1	0	0	0	0	1	1	1	0	0	0
FGF3	1	1	1	1	1	1	0	1	0	0	0	0	1	1	1	0	0	0
FGF4	1	1	1	1	1	1	0	1	0	0	0	0	1	1	1	0	0	0
FGFR1	1	1	1	1	1	1	0	1	0	0	0	0	1	1	1	0	0	0
FGFR2	1	1	1	1	1	1	0	1	0	0	0	0	1	1	1	0	0	0
FGFR3	1	1	1	1	1	1	0	1	0	0	0	0	1	1	1	0	0	0
FGFR4	1	1	1	1	1	1	0	1	0	0	0	0	1	1	1	0	0	0
FH	1	1	1	1	0	0	0	0	0	1	0	1	1	1	0	1	0	0
FLCN	1	1	1	1	0	0	0	0	1	1	0	1	1	1	0	1	0	0
FLI1	0	0	0	0	0	0	0	0	0	0	0	0	1	1	0	0	0	0
FLT1	1	1	1	1	1	1	0	1	0	0	0	0	1	1	1	0	0	0
FLT3	1	1	1	1	1	1	0	1	0	0	0	0	1	1	1	0	0	0
FLT4	1	1	1	1	1	1	0	1	0	0	0	0	1	1	1	0	0	0
FOLH1	0	0	0	0	0	0	0	1	0	0	0	0	0	0	1	0	0	0
FOXL2	1	1	0	0	0	0	0	0	0	0	0	0	0	0	0	0	1	0
FOXO1	0	0	0	0	0	0	0	0	0	0	0	0	1	1	0	0	0	0
FOXP1	0	0	0	0	0	0	0	0	0	1	0	1	1	1	0	0	0	0
FP	1	1	1	1	0	0	0	0	0	1	0	1	1	1	0	1	0	0
FUS	0	0	0	0	0	0	0	0	0	0	0	0	1	1	0	0	0	0
FYN	1	1	1	1	1	1	0	1	0	0	0	0	1	1	1	0	0	0
GAK	1	1	1	1	1	1	0	1	0	0	0	0	1	1	1	0	0	0
GAS6	0	0	0	0	0	0	0	1	0	0	0	0	0	0	1	0	0	0
GATA2	1	1	1	1	0	0	0	0	0	0	0	0	0	0	0	0	0	0
GLI1	1	1	1	1	1	1	0	1	0	0	0	0	1	1	1	0	0	0
GLI2	1	1	1	1	1	1	0	1	0	0	0	0	1	1	1	0	0	0
GLI3	1	1	1	1	1	1	0	1	0	0	0	0	1	1	1	0	0	0
GNA11	1	0	1	0	0	0	0	0	0	0	0	0	0	0	0	0	0	0
GNAQ	1	0	1	0	0	0	0	0	0	0	0	0	0	0	0	0	0	0
GNAS	1	1	1	1	1	1	0	1	0	0	0	0	1	1	1	0	0	0
GPC3	1	1	1	1	0	0	0	0	0	0	0	0	0	0	0	0	0	0
GPRC5A	1	1	1	1	0	0	0	0	0	0	0	0	0	0	0	0	0	0
GRM1	0	0	0	0	1	1	0	1	0	0	0	0	1	1	1	0	0	0
GSTM1	1	1	1	1	0	0	0	0	0	0	0	0	0	0	0	0	0	0
GSTT1	1	1	1	1	0	0	0	0	0	0	0	0	0	0	0	0	0	0
H3F3A	1	1	0	0	0	0	0	0	0	0	0	0	0	0	0	0	0	0
HAVCR2	0	0	0	0	0	0	0	1	0	0	0	0	0	0	1	0	0	0
HDAC2	1	1	1	1	0	0	0	0	1	1	0	1	1	1	0	1	0	0
HEY1	0	0	0	0	0	0	0	0	0	0	0	0	1	1	0	0	0	0
HGF	1	1	1	1	1	1	0	1	0	0	0	0	1	1	1	0	0	0
HIF2A	1	1	1	1	0	0	0	0	0	0	0	0	0	0	0	0	0	0
HLA-A	0	0	0	0	0	0	0	0	0	1	0	1	1	1	0	1	0	0
HNF1A	1	1	1	1	0	0	0	0	0	0	0	0	0	0	0	0	0	0
HORMAD1	1	1	1	1	0	0	0	0	0	0	0	0	0	0	0	0	0	0
HORMAD2	1	1	1	1	0	0	0	0	0	0	0	0	0	0	0	0	0	0
HPC10	1	1	1	1	0	0	0	0	0	0	0	0	0	0	0	0	0	0
HPC11	1	1	1	1	0	0	0	0	0	0	0	0	0	0	0	0	0	0
HPC12	1	1	1	1	0	0	0	0	0	0	0	0	0	0	0	0	0	0
HPC13	1	1	1	1	0	0	0	0	0	0	0	0	0	0	0	0	0	0
HPC14	1	1	1	1	0	0	0	0	0	0	0	0	0	0	0	0	0	0
HPC15	1	1	1	1	0	0	0	0	0	0	0	0	0	0	0	0	0	0
HPC2	1	1	1	1	0	0	0	0	0	0	0	0	0	0	0	0	0	0
HPC3	1	1	1	1	0	0	0	0	0	0	0	0	0	0	0	0	0	0
HPC4	1	1	1	1	0	0	0	0	0	0	0	0	0	0	0	0	0	0
HPC5	1	1	1	1	0	0	0	0	0	0	0	0	0	0	0	0	0	0
HPC6	1	1	1	1	0	0	0	0	0	0	0	0	0	0	0	0	0	0
HPC7	1	1	1	1	0	0	0	0	0	0	0	0	0	0	0	0	0	0
HPC8	1	1	1	1	0	0	0	0	0	0	0	0	0	0	0	0	0	0
HPC9	1	1	1	1	0	0	0	0	0	0	0	0	0	0	0	0	0	0
HPCX2	1	1	1	1	0	0	0	0	0	0	0	0	0	0	0	0	0	0
HPS1	1	1	1	1	0	0	0	0	0	0	0	0	0	0	0	0	0	0
HPT1	1	1	1	1	0	0	0	0	0	0	0	0	0	0	0	0	0	0
HRAS	1	1	1	1	1	1	0	1	0	0	0	0	1	1	1	0	0	0
HSP90AA1	1	1	1	1	1	1	0	1	0	0	0	0	1	1	1	0	0	0
HSP90AA2	1	1	1	1	1	1	0	1	0	0	0	0	1	1	1	0	0	0
HSP90AB1	1	1	1	1	1	1	0	1	0	0	0	0	1	1	1	0	0	0
HSP90B1	1	1	1	1	1	1	0	1	0	0	0	0	1	1	1	0	0	0
ICOS	0	0	0	0	0	0	0	0	0	0	0	1	0	0	0	1	0	0
ID2	1	1	1	1	0	0	0	0	0	0	0	0	1	1	0	0	0	0
ID3	1	1	1	1	0	0	0	0	0	0	0	0	1	1	0	0	0	0
IDH1	1	0	1	0	0	0	0	0	0	0	0	0	0	0	0	0	0	0
IDH2	1	0	1	0	0	0	0	0	0	0	0	0	0	0	0	0	0	0
IDO1	0	0	0	0	0	0	0	1	0	0	0	0	0	0	1	0	0	0
IDO2	0	0	0	0	0	0	0	1	0	0	0	0	0	0	1	0	0	0
IGF1R	1	1	1	1	1	1	0	1	0	0	0	0	1	1	1	0	0	0
IGFBPS	0	0	0	0	1	0	0	1	0	0	0	0	0	0	1	0	0	0
IGH	0	0	0	0	0	0	0	0	0	0	0	0	1	1	0	0	0	0
IGK	0	0	0	0	0	0	0	0	0	0	0	0	1	1	0	0	0	0
IKZF1	1	1	1	1	0	0	0	0	0	1	0	1	1	1	0	1	0	0
IL21R	1	1	1	1	1	1	0	1	0	0	0	0	1	1	1	0	0	0
IL6	0	0	0	0	0	0	0	1	0	0	0	0	0	0	1	0	0	0
IL6R	0	0	0	0	0	0	0	1	0	0	0	0	0	0	1	0	0	0
IL6ST	1	1	1	1	1	1	0	1	0	0	0	0	1	1	1	0	0	0
IL7R	1	1	1	1	1	1	0	1	0	0	0	0	1	1	1	0	0	0
IRF4	0	0	0	0	0	0	0	1	0	0	0	0	0	0	1	0	0	0
IRS2	0	0	0	0	1	0	0	1	0	0	0	0	0	0	1	0	0	0
JAK1	1	1	1	1	1	1	0	1	0	0	0	0	1	1	1	0	0	0
JAK2	1	1	1	1	1	1	0	1	0	0	0	0	1	1	1	0	0	0
JAK3	1	1	1	1	1	1	0	1	0	0	0	0	1	1	1	0	0	0
JAZF1	0	0	0	0	0	0	0	0	0	0	0	0	1	1	0	0	0	0
JUN	1	1	1	1	1	1	0	1	0	0	0	0	1	1	1	0	0	0
KDM5A	1	1	1	1	1	0	0	0	0	0	0	0	0	0	1	0	0	0
KDM5C	1	1	1	1	0	0	0	0	0	0	0	0	0	0	0	0	0	0
KDM6A	1	1	1	1	0	0	0	0	0	0	0	0	0	0	0	0	0	0
KDR	1	1	1	1	1	1	0	1	0	0	0	0	1	1	1	0	0	0
KIAA0125	0	0	0	0	0	0	0	0	0	0	0	0	1	1	0	0	0	0
KIF1B	1	1	1	1	0	0	0	0	1	1	0	1	1	1	0	1	0	0
KIR2DL1	0	0	0	0	0	0	0	1	0	0	0	0	0	0	1	0	0	0
KIR2DL2	0	0	0	0	0	0	0	1	0	0	0	0	0	0	1	0	0	0
KIR2DL3	0	0	0	0	0	0	0	1	0	0	0	0	0	0	1	0	0	0
KIT	1	1	1	1	1	1	0	1	0	0	0	0	1	1	1	0	0	0
KITLG	1	1	1	1	0	0	0	0	0	0	0	0	0	0	0	0	0	0
KLB	1	1	1	1	1	1	0	1	0	0	0	0	1	1	1	0	0	0
KMT2A	1	1	1	1	0	0	0	0	0	0	0	0	1	1	0	0	0	0
KMT2B	1	1	1	1	0	0	0	0	0	1	0	1	1	1	0	1	0	0
KMT2C	1	1	1	1	0	0	0	0	0	1	0	1	1	1	0	1	0	0
KMT2D	1	1	1	1	0	0	0	0	0	1	0	1	1	1	0	1	0	0
KRAS	1	1	1	1	1	1	0	1	0	0	0	0	1	1	1	0	0	0
KSR2	1	1	0	0	0	0	0	0	0	0	0	0	0	0	0	0	0	0
LAG3	0	0	0	0	0	0	0	0	0	0	0	0	0	0	0	0	1	1
LATS1	1	1	1	1	1	1	0	1	0	0	0	0	1	1	1	0	0	0
LCK	1	1	1	1	1	1	0	1	0	0	0	0	1	1	1	0	0	0
LIG1	1	1	1	1	0	0	0	0	1	1	0	1	1	1	0	1	0	0
LMTK3	1	1	1	1	1	1	0	1	0	0	0	0	1	1	1	0	0	0
LPP	0	0	0	0	0	0	0	0	0	0	0	0	1	1	0	0	0	0
LRG5	0	0	0	0	0	0	0	1	0	0	0	0	0	0	1	0	0	0
LZTR1	0	0	0	0	0	0	0	0	0	1	0	1	1	1	0	0	0	0
MAGEA3	0	0	0	0	0	0	0	1	0	0	0	0	0	0	1	0	0	0
MALAT1	0	0	0	0	0	0	0	0	0	0	0	0	0	0	1	0	0	0
MAML2	0	0	0	0	0	0	0	0	0	0	0	0	1	1	0	0	0	0
MAP2K1	1	1	1	1	1	1	0	1	0	0	0	0	1	1	1	0	0	0
MAP2K2	1	1	1	1	1	1	0	1	0	0	0	0	1	1	1	0	0	0
MAP3K1	1	1	1	1	0	0	0	0	1	1	0	1	1	1	0	1	0	0
MAP3K6	1	1	1	1	0	0	0	0	0	0	0	0	0	0	0	0	0	0
MAX	1	1	1	1	1	1	0	1	0	0	0	0	1	1	1	0	0	0
MCL1	0	0	0	0	1	0	0	0	0	0	0	0	0	0	1	0	0	0
MDH2	1	1	1	1	0	0	0	0	0	0	0	0	0	0	0	0	0	0
MDM2	1	1	1	1	1	1	0	1	0	0	0	0	1	1	1	0	0	0
MDM4	1	1	1	1	1	1	0	1	0	0	0	0	1	1	1	0	0	0
MED12	1	1	1	1	0	0	0	0	0	0	0	0	0	0	0	0	0	0
MEN1	1	1	1	1	0	0	0	0	0	1	0	1	1	1	0	1	0	0
MERTK	1	1	1	1	1	1	0	1	0	0	0	0	1	1	1	0	0	0
MET	1	1	1	1	1	1	0	1	0	0	0	0	1	1	1	0	0	0
MITF	0	0	0	0	0	0	0	0	0	0	0	0	0	0	1	0	0	0
MLH1	1	1	1	1	0	0	0	0	1	1	0	1	1	1	0	1	0	0
MLH3	1	1	1	1	0	0	0	0	1	1	0	1	1	1	0	1	0	0
MLL	0	0	0	0	0	0	0	0	0	0	0	0	1	1	0	0	0	0
MLL2	1	1	1	1	0	0	0	0	0	1	0	1	1	1	0	1	0	0
MLL3	1	1	1	1	0	0	0	0	1	1	0	1	1	1	0	1	0	0
MLL4	1	1	1	1	0	0	0	0	0	1	0	1	1	1	0	1	0	0
MLLT1	0	0	0	0	0	0	0	0	0	0	0	0	1	1	0	0	0	0
MMS19	1	1	1	1	0	0	0	0	0	0	0	0	0	0	0	0	0	0
MN1	1	1	1	1	0	0	0	0	0	0	0	0	0	0	0	0	0	0
MPL	1	1	1	1	0	0	0	0	0	0	0	0	0	0	0	0	0	0
MRE11A	1	1	1	1	0	0	0	0	1	1	0	1	1	1	0	1	0	0
MS4A1	0	0	0	0	0	0	0	0	0	0	0	0	0	0	1	0	0	0
MSH2	1	1	1	1	0	0	0	0	1	1	0	1	1	1	0	1	0	0
MSH6	1	1	1	1	0	0	0	0	1	1	0	1	1	1	0	1	0	0
MSLN	0	0	0	0	0	0	0	1	0	0	0	0	0	0	1	0	0	0
MST1R	1	1	1	1	1	1	0	1	0	0	0	0	1	1	1	0	0	0
MTH1	0	0	0	0	0	0	0	0	0	0	0	0	0	0	1	0	0	0
MTOR	1	1	1	1	1	1	0	1	0	0	0	0	1	1	1	0	0	0
MUTYH	1	1	1	1	0	0	0	0	1	1	0	1	1	1	0	1	0	0
MYB	1	0	0	0	1	0	0	1	0	0	0	0	1	1	1	0	0	0
MYC	1	1	1	1	1	1	0	1	0	0	0	0	1	1	1	0	0	0
MYCL	1	1	1	1	1	1	0	1	0	0	0	0	1	1	1	0	0	0
MYCN	1	1	1	1	1	1	0	1	0	0	0	0	1	1	1	0	0	0
MYCT1	1	1	0	1	0	0	0	0	0	0	0	0	0	0	0	0	0	0
MYD88	1	1	1	1	1	1	0	1	0	0	0	0	1	1	1	0	0	0
MYEOV	0	0	0	0	0	0	0	0	0	0	0	0	1	1	0	0	0	0
MYOD1	1	0	0	0	0	0	0	0	0	0	0	0	0	0	1	0	0	0
NAB2	0	0	0	0	0	0	0	0	0	0	0	0	1	1	0	0	0	0
NAMPT	1	1	1	1	0	0	0	0	0	0	0	0	0	0	0	0	0	0
NBN	1	1	1	1	0	0	0	0	1	1	0	1	1	1	0	1	0	0
NCOA2	0	0	0	0	0	0	0	0	0	0	0	0	1	1	0	0	0	0
NDRG1	1	1	1	1	0	0	0	0	0	1	0	1	1	1	0	1	0	0
NF1	1	1	1	1	0	0	0	0	0	1	0	1	1	1	0	1	0	0
NF2	1	1	1	1	0	0	0	0	0	1	0	1	1	1	0	1	0	0
NFATC1	0	0	0	0	1	0	0	1	0	0	0	0	0	0	1	0	0	0
NFIB	0	0	0	0	1	1	0	0	0	0	0	0	1	1	1	0	0	0
NFKBIA	1	1	1	1	0	0	0	0	0	1	0	1	1	1	0	1	0	0
NFKBIE	1	1	1	1	0	0	0	0	0	1	0	1	1	1	0	1	0	0
NOTCH1	1	1	1	1	1	1	0	1	0	0	0	0	1	1	1	0	0	0
NOTCH2	1	1	1	1	1	1	0	1	0	0	0	0	1	1	1	0	0	0
NR4A3	0	0	0	0	0	0	0	0	0	0	0	0	1	1	0	0	0	0
NRAS	1	1	1	1	1	1	0	1	0	0	0	0	1	1	1	0	0	0
NRG1	1	1	1	1	1	1	0	1	0	0	0	0	1	1	1	0	0	0
NRG2	1	1	1	1	1	1	0	1	0	0	0	0	1	1	1	0	0	0
NRG3	1	1	1	1	1	1	0	1	0	0	0	0	1	1	1	0	0	0
NRG4	1	1	1	1	1	1	0	1	0	0	0	0	1	1	1	0	0	0
NSD1	1	1	1	1	0	0	0	0	0	0	0	0	1	1	0	0	0	0
NT5E	0	0	0	0	0	0	0	1	0	0	0	0	0	0	1	0	0	0
NTRK1	1	1	1	1	1	1	1	1	0	0	1	0	1	1	1	0	0	0
NTRK2	1	1	1	1	1	1	1	1	0	0	1	0	1	1	1	0	0	0
NTRK3	1	1	1	1	1	1	1	1	0	0	1	0	1	1	1	0	0	0
NUDT1	0	0	0	0	0	0	0	0	0	0	0	0	0	0	1	0	0	0
NUTM1	0	0	0	0	0	0	0	0	0	0	0	0	1	1	0	0	1	0
OSM	1	1	1	1	1	1	0	1	0	0	0	0	1	1	1	0	0	0
OSMR	1	1	1	1	1	1	0	0	0	0	0	0	1	1	0	0	0	0
PAK4	0	0	0	0	1	0	0	1	0	0	0	0	0	0	1	0	0	0
PALB2	1	1	1	1	0	0	0	0	1	1	0	1	1	1	0	1	0	0
PARP1	1	1	1	1	0	1	0	1	0	1	0	1	1	1	1	1	0	0
PARP2	1	1	1	1	0	1	0	1	0	1	0	1	1	1	1	1	0	0
PARP3	1	1	1	1	0	1	0	1	0	1	0	1	1	1	1	1	0	0
PAX3	0	0	0	0	0	0	0	0	0	0	0	0	1	1	0	0	0	0
PAX5	1	1	1	1	0	0	0	0	0	0	0	0	0	0	0	0	0	0
PAX7	0	0	0	0	0	0	0	0	0	0	0	0	1	1	0	0	0	0
PBRM1	1	1	1	1	0	0	0	0	0	0	0	0	0	0	0	0	0	0
PDCD1	0	0	0	0	0	0	0	0	0	0	0	0	0	0	0	0	1	1
PDCD1LG2	0	0	0	0	0	0	0	0	0	0	0	0	0	0	0	0	1	1
PDGFA	1	1	1	1	1	1	0	1	0	0	0	0	1	1	1	0	0	0
PDGFB	1	1	1	1	1	1	0	1	0	0	0	0	1	1	1	0	0	0
PDGFRA	1	1	1	1	1	1	0	1	0	0	0	0	1	1	1	0	0	0
PDGFRB	1	1	1	1	1	1	0	1	0	0	0	0	1	1	1	0	0	0
PELP1	0	0	0	0	1	1	0	1	0	0	0	0	0	0	1	0	0	0
PHD1	1	1	1	1	0	0	0	0	0	0	0	0	0	0	0	0	0	0
PHD2	1	1	1	1	0	0	0	0	0	0	0	0	0	0	0	0	0	0
PHF1	0	0	0	0	0	0	0	0	0	0	0	0	1	1	0	0	0	0
PHF6	1	1	1	1	0	0	0	0	0	0	0	0	0	0	0	0	0	0
PHLPP1	1	1	1	1	0	0	0	0	0	1	0	0	1	1	0	0	0	1
PHOX2B	1	1	1	1	0	0	0	0	0	0	0	0	0	0	0	0	0	0
PIK3C2G	1	1	1	1	0	0	0	0	0	0	0	0	0	0	0	0	0	0
PIK3CA	1	1	1	1	1	1	0	1	0	0	0	0	1	1	1	0	0	0
PIK3CD	1	1	1	1	1	1	0	1	0	0	0	0	1	1	1	0	0	0
PIK3R1	1	1	1	1	1	1	0	1	0	0	0	0	1	1	1	0	0	0
PIK3R2	1	1	1	1	0	0	0	0	0	0	0	0	0	0	0	0	0	0
PIK3R5	1	1	1	1	1	1	0	1	0	0	0	0	1	1	1	0	0	0
PIM1	1	1	1	1	0	0	0	0	0	0	0	0	0	0	0	0	0	0
PIM2	1	1	1	1	1	1	0	1	0	0	0	0	1	1	1	0	0	0
PLAG1	0	0	0	0	0	0	0	0	0	0	0	0	1	1	0	0	0	0
PLK1	1	1	1	1	1	1	0	1	0	0	0	0	1	1	1	0	0	0
PLK2	1	1	1	1	1	1	0	1	0	0	0	0	1	1	1	0	0	0
PLK3	1	1	1	1	1	1	0	1	0	0	0	0	1	1	1	0	0	0
PMEL	0	0	0	0	0	0	0	1	0	0	0	0	0	0	1	0	0	0
PMS1	1	1	1	1	0	0	0	0	0	1	0	1	1	1	0	1	0	0
PMS2	1	1	1	1	0	0	0	0	0	1	0	1	1	1	0	1	0	0
PNKP	1	1	1	1	0	0	0	0	1	1	0	1	1	1	0	1	0	0
POLD1	1	1	1	1	0	0	0	0	0	0	0	0	0	0	0	0	0	0
POLE	1	1	1	1	0	0	0	0	0	0	0	0	0	0	0	0	0	0
PPM1D	1	1	1	1	1	1	0	0	0	0	0	0	1	1	0	0	0	0
PRAME	0	0	0	0	0	0	0	1	0	0	0	0	0	0	1	0	0	0
PRF1	1	1	1	1	0	0	0	0	0	0	0	0	0	0	0	0	0	0
PRKACA	1	1	0	0	1	1	0	1	0	0	0	0	1	1	1	0	0	0
PRKAR1A	1	1	1	1	0	0	0	0	0	1	0	1	1	1	0	1	0	0
PTCH1	1	1	1	1	0	0	0	0	1	1	0	1	1	1	0	1	0	0
PTCH2	1	1	1	1	0	0	0	0	1	1	0	1	1	1	0	1	0	0
PTEN	1	1	1	1	0	0	0	0	0	1	0	1	1	1	0	1	0	0
PTGFR	1	1	1	1	0	0	0	0	0	0	0	0	0	0	0	0	0	0
PTPN1	1	1	1	1	0	0	0	0	0	1	0	1	1	1	0	1	0	0
PTPN11	1	1	1	1	0	0	0	0	0	1	0	1	1	1	0	1	0	0
PTPN12	1	1	1	1	0	0	0	0	0	1	0	1	1	1	0	1	0	0
PTPN2	1	1	1	1	0	0	0	0	0	1	0	1	1	1	0	1	0	0
PTPRF	1	1	1	1	0	0	0	0	0	1	0	1	1	1	0	1	0	0
PTPRJ	1	1	1	1	0	0	0	0	0	1	0	1	1	1	0	1	0	0
PTPRK	0	0	0	0	0	0	0	0	0	0	0	0	1	1	0	0	0	0
RAB35	1	1	1	1	1	1	0	1	0	0	0	0	1	1	1	0	0	0
RAD18	1	1	1	1	0	0	0	0	1	1	0	1	1	1	0	1	0	0
RAD50	1	1	1	1	0	0	0	0	0	1	0	1	1	1	0	1	0	0
RAD51	1	1	1	1	0	0	0	0	0	1	0	1	1	1	0	1	0	0
RAD51AP1	1	1	1	1	0	0	0	0	1	1	0	1	1	1	0	1	0	0
RAD51B	1	1	1	1	0	0	0	0	1	1	0	1	1	1	0	1	0	0
RAD51C	1	1	1	1	0	0	0	0	1	1	0	1	1	1	0	1	0	0
RAD51D	1	1	1	1	0	0	0	0	1	1	0	1	1	1	0	1	0	0
RAD54B	1	1	1	1	0	0	0	0	1	1	0	1	1	1	0	1	0	0
RAD54L	1	1	1	1	0	0	0	0	1	1	0	1	1	1	0	1	0	0
RAF1	1	1	1	1	1	1	0	1	0	0	0	0	1	1	1	0	0	0
RAP1B	0	0	0	0	0	0	0	1	0	0	0	0	0	0	1	0	0	0
RARA	1	1	1	1	0	0	0	0	0	1	0	1	1	1	0	1	0	0
RASA1	1	1	1	1	0	0	0	0	0	1	0	1	1	1	0	1	0	0
RASA2	1	1	1	1	0	0	0	0	0	1	0	1	1	1	0	1	0	0
RB1	1	1	1	1	0	0	0	0	1	1	0	1	1	1	0	1	0	0
RECQL	1	1	1	1	0	0	0	0	1	1	0	1	1	1	0	1	0	0
RECQL2	1	1	1	1	0	0	0	0	1	1	0	1	1	1	0	1	0	0
RECQL4	1	1	1	1	0	0	0	0	1	1	0	1	1	1	0	1	0	0
RET	1	1	1	1	1	1	0	1	0	0	0	0	1	1	1	0	0	0
RHBDF2	1	1	1	1	0	0	0	0	1	1	0	1	1	1	0	1	0	0
RHEB	1	1	1	1	1	1	0	1	0	0	0	0	1	1	1	0	0	0
RHOA	1	1	1	1	1	1	0	1	0	0	0	0	1	1	1	0	0	0
RICTOR	1	1	1	1	1	1	0	1	0	0	0	0	1	1	1	0	0	0
RINT1	1	1	1	1	0	0	0	0	0	0	0	0	0	0	0	0	0	0
RIT1	1	1	1	1	1	1	0	1	0	0	0	0	1	1	1	0	0	0
RME1	1	1	1	1	1	1	0	1	0	0	0	0	1	1	1	0	0	0
RME12	1	1	1	1	0	0	0	0	0	1	0	1	1	1	0	1	0	0
RME3	1	1	1	1	1	1	0	1	0	0	0	0	1	1	1	0	0	0
RNF2	1	1	0	0	0	0	0	0	1	1	0	1	1	1	0	1	0	0
RNF43	1	1	1	1	0	0	0	0	0	1	0	1	1	1	0	1	0	0
ROR1	1	1	1	1	1	1	0	1	0	0	0	0	1	1	1	0	0	0
ROS1	1	1	1	1	1	1	0	1	0	0	0	0	1	1	1	0	0	0
RPA1	1	1	1	1	0	0	0	0	1	1	0	1	1	1	0	1	0	0
RPTOR	1	1	1	1	1	1	0	1	0	0	0	0	1	1	1	0	0	0
RRAS2	1	1	1	1	1	1	0	1	0	0	0	0	0	0	1	0	0	0
RSPO2	0	0	0	0	0	0	0	0	0	0	0	0	1	1	0	0	0	0
RSPO3	0	0	0	0	0	0	0	0	0	0	0	0	1	1	0	0	0	0
RUNX1	1	1	1	1	0	0	0	0	0	1	0	1	1	1	0	1	0	0
SBDS	1	1	1	1	0	0	0	0	0	0	0	0	0	0	0	0	0	0
SDH5	1	1	1	1	0	0	0	0	0	0	0	0	0	0	0	0	0	0
SDHA	1	1	1	1	0	0	0	0	1	1	0	1	1	1	0	1	0	0
SDHAF2	1	1	1	1	0	0	0	0	0	0	0	0	0	0	0	0	0	0
SDHB	1	1	1	1	0	0	0	0	1	1	0	1	1	1	0	1	0	0
SDHC	1	1	1	1	0	0	0	0	1	1	0	1	1	1	0	1	0	0
SDHD	1	1	1	1	0	0	0	0	1	1	0	1	1	1	0	1	0	0
SEM1	1	1	1	1	0	0	0	0	0	1	0	1	1	1	0	1	0	0
SETD2	1	1	1	1	0	0	0	0	1	1	0	1	1	1	0	1	0	0
SF3B1	1	1	0	0	0	0	0	0	0	0	0	0	0	0	0	0	0	0
SHFM1	1	1	1	1	0	0	0	0	0	1	0	1	1	1	0	1	0	0
SHH	1	1	1	1	1	1	0	1	0	0	0	0	1	1	1	0	0	0
SLC39A6	0	0	0	0	1	0	0	1	0	0	0	0	0	0	0	0	1	0
SLFN11	1	1	1	1	0	0	0	1	0	1	0	1	1	1	1	1	0	0
SLX4	1	1	1	1	0	0	0	0	0	0	0	0	0	0	0	0	0	0
SMAD4	1	1	1	1	0	0	0	0	1	1	0	1	1	1	0	1	0	0
SMARCA4	1	1	1	1	0	0	0	0	1	1	0	1	1	1	0	1	0	0
SMARCAL1	1	1	0	0	0	0	0	0	1	1	0	1	1	1	0	1	0	0
SMARCB1	1	1	1	1	0	0	0	0	1	1	0	1	1	1	0	1	0	0
SMARCE1	1	1	1	1	0	0	0	0	1	1	0	1	1	1	0	1	0	0
SMO	1	1	1	1	1	1	0	1	0	0	0	0	1	1	1	0	0	0
SOCS1	0	0	0	0	0	0	0	1	0	0	0	0	0	0	1	0	0	0
SOX10	1	1	1	1	1	1	0	1	0	0	0	0	1	1	1	0	0	0
SPTA1	1	1	1	1	0	0	0	0	0	1	0	0	0	0	0	0	0	0
SRC	1	1	1	1	1	1	0	1	0	0	0	0	1	1	1	0	0	0
SRSF2	1	1	0	0	0	0	0	0	0	0	0	0	0	0	0	0	0	0
SS18	0	0	0	0	0	0	0	0	0	0	0	0	1	1	0	0	0	0
SSRP1	1	1	1	1	0	0	0	0	0	1	0	1	1	1	0	1	0	0
SSTR1	0	0	0	0	0	0	0	1	0	0	0	0	0	0	1	0	0	0
SSTR2	0	0	0	0	0	0	0	1	0	0	0	0	0	0	1	0	0	0
SSTR3	0	0	0	0	0	0	0	1	0	0	0	0	0	0	1	0	0	0
SSTR4	0	0	0	0	0	0	0	1	0	0	0	0	0	0	1	0	0	0
SSTR5	0	0	0	0	0	0	0	1	0	0	0	0	0	0	1	0	0	0
SSX1	0	0	0	0	0	0	0	0	0	0	0	0	1	1	0	0	0	0
SSX2	0	0	0	0	0	0	0	0	0	0	0	0	1	1	0	0	0	0
STAT3	0	0	0	0	0	0	0	1	0	0	0	0	0	0	1	0	0	0
STAT5B	1	0	1	0	0	0	0	0	0	0	0	0	0	0	0	0	0	0
STAT6	0	0	0	0	0	0	0	0	0	0	0	0	1	1	0	0	0	0
STK11	1	1	1	1	0	0	0	0	0	1	0	1	1	1	0	1	0	0
STK36	1	1	1	1	0	0	0	0	0	0	0	0	0	0	0	0	0	0
SUFU	1	1	1	1	0	0	0	0	0	1	0	1	1	1	0	1	0	0
SUZ12	1	1	1	1	0	0	0	0	1	1	0	1	1	1	0	1	0	0
SYK	1	1	1	1	1	1	0	1	0	0	0	0	1	1	1	0	0	0
TACSTD1	1	1	1	1	0	0	0	0	0	0	0	0	0	0	0	0	0	0
TACSTD2	0	0	0	0	1	0	0	1	0	0	0	0	0	0	1	0	0	0
TEAD1	1	1	1	1	1	1	0	1	0	0	0	0	1	1	1	0	0	0
TEK	1	1	1	1	1	1	0	1	0	0	0	0	1	1	1	0	0	0
TERT	1	1	1	1	1	1	0	1	0	0	0	0	1	1	1	0	0	0
TET1	1	1	1	1	0	0	0	0	0	0	0	0	0	0	0	0	0	0
TET2	1	1	1	1	0	0	0	0	0	0	0	0	0	0	0	0	0	0
TFE3	0	0	0	0	0	0	0	0	0	0	0	0	1	1	1	0	0	0
TGFB1	1	1	0	0	1	0	0	1	0	0	0	0	0	0	1	0	0	0
TIE2	1	1	1	1	1	1	0	1	0	0	0	0	1	1	1	0	0	0
TMEM127	1	1	1	1	0	0	0	0	0	0	0	0	0	0	0	0	0	0
TMPRSS2	0	0	0	0	0	0	0	0	0	0	0	0	1	1	0	0	0	0
TMSB4X	1	1	1	1	0	0	0	0	0	0	0	0	0	0	0	0	0	0
TNFAIP3	1	1	1	1	0	0	0	0	0	0	0	0	0	0	0	0	0	0
TNFRSF18	0	0	0	0	0	0	0	0	0	0	0	1	0	0	0	1	0	0
TNFRSF4	0	0	0	0	0	0	0	0	0	0	0	1	0	0	0	1	0	0
TNFRSF9	0	0	0	0	0	0	0	0	0	0	0	1	0	0	0	1	0	0
TP53	1	1	1	1	0	0	0	0	1	1	0	1	1	1	0	1	0	0
TPTE	0	0	0	0	0	0	0	1	0	0	0	0	0	0	1	0	0	0
TRAP1	1	1	1	1	1	1	0	1	0	0	0	0	1	1	1	0	0	0
TRIM37	0	0	0	0	1	1	0	1	0	0	0	0	0	0	1	0	0	0
TSC1	1	1	1	1	0	0	0	0	0	1	0	1	1	1	0	1	0	0
TSC2	1	1	1	1	0	0	0	0	0	1	0	1	1	1	0	1	0	0
TSHR	0	0	0	0	0	0	0	1	0	0	0	0	0	0	1	0	0	0
TSSK3	1	1	1	1	0	0	0	0	0	0	0	0	0	0	0	0	0	0
TYR	0	0	0	0	0	0	0	1	0	0	0	0	0	0	1	0	0	0
UBE2N	1	1	1	1	0	0	0	0	1	1	0	1	1	1	0	1	0	0
USP11	1	1	1	1	0	0	0	0	0	0	0	0	0	0	0	0	0	0
USP6	0	0	0	0	0	0	0	0	0	0	0	0	1	1	0	0	0	0
VEGFA	1	1	1	1	1	1	0	1	0	0	0	0	1	1	1	0	0	0
VEGFB	1	1	1	1	1	1	0	1	0	0	0	0	1	1	1	0	0	0
VHL	1	1	1	1	0	0	0	0	1	1	0	1	1	1	0	1	0	0
VSIR	0	0	0	0	0	0	0	0	0	0	0	0	0	0	0	0	1	0
WIF1	0	0	0	0	0	0	0	0	0	1	0	1	0	0	1	1	0	0
WNK2	1	1	1	1	0	0	0	0	0	1	0	1	1	1	0	1	0	0
WRN	1	1	1	1	0	0	0	0	0	0	0	0	0	0	0	0	0	0
WT1	0	0	1	1	0	0	0	0	0	1	0	1	0	0	1	1	0	0
WWTR1	0	0	0	0	0	0	0	0	0	0	0	0	1	1	0	0	0	0
XAB2	1	1	1	1	0	0	0	0	1	1	0	1	1	1	0	1	0	0
XPA	1	1	1	1	0	0	0	0	0	0	0	0	0	0	0	0	0	0
XPC	1	1	1	1	0	0	0	0	0	0	0	0	0	0	0	0	0	0
XPO1	1	1	1	1	1	0	0	1	0	0	0	0	0	0	1	0	0	0
XRCC1	1	1	1	1	0	0	0	0	1	1	0	1	1	1	0	1	0	0
XRCC2	1	1	1	1	0	0	0	0	1	1	0	1	1	1	0	1	0	0
XRCC3	1	1	1	1	0	0	0	0	1	1	0	1	1	1	0	1	0	0
XRCC9	1	1	1	1	0	0	0	0	1	1	0	1	1	1	0	1	0	0
YAP1	1	1	1	1	1	1	0	1	0	0	0	0	1	1	1	0	0	0
YWHAE	0	0	0	0	0	0	0	0	0	0	0	0	1	1	0	0	0	0
ZNF217	0	0	0	0	1	1	0	1	0	0	0	0	0	0	1	0	0	0
Abbreviations
SNV, single-nucleotide variant
Indel, small insertion and deletion
"1" indicates that this mutation type was taken into account.
"0" indicates that this alteration type was not taken into account.

## Sheet: Supplementary Table S3
Supplementary Table S3. Diagnostic reevaluation
Patient	Original diagnosis	Molecular alteration(s)	Differential diagnosis
P0035	Spindle cell rhabdomyosarcoma	FUS-TFCP2	Spindle cell rhabdomyosarcoma with FUS-TFCP2 fusion
P0112	Carcinoma of unknown primary site	PTCH1 mutation	Basal cell carcinoma
P0127	Epitheloid malignant peripheral nerve sheath tumor	SMARCB1 mutation	Epithelioid sarcoma/rhabdoid tumor
P0128	Carcinoma of unknown primary site	FGFR2-WAC	Cholangiocellular carcinoma
P0153	Fibrosarcoma	NAB2-STAT6	Solitary fibrous tumor
P0238	Carcinoma of unknown primary site	MYB-NFIB	Adenoid cystic carcinoma
P0241	Carcinoma of unknown primary site	FGFR2-BICC1	Cholangiocellular carcinoma
P0246	Malignant mesenchymal tumor	KDR mutation	Angiosarcoma
P0248	Fibrosarcoma	COL1A1-PDGFB	Dermatofibrosarcoma protuberans
P0257	Undifferentited pleomorphic sarcoma	CDK4/MDM2 amplification	Liposarcoma
P0264	Sarcoma not otherwise specified	EWSR1-CREB3L1	Sclerosing epithelioid fibrosarcoma
P0267	Sarcoma not otherwise specified	MYOD1 mutation	Embryonal rhabdomyosarcoma
P0270	Epithelioid hemangioendothelioma	NAB2-STAT6	Solitary fibrous tumor
P0275	Salivary gland carcinoma	High tumor mutational burden, single-base substitution signature 7, high MITF expression	Melanoma
P0291	Carcinoma of unknown primary site	FGFR2-BICC1, IDH2 mutation	Cholangiocellular carcinoma
P0333	Angiomatoid fibrous histiocytoma	EWSR1-WT1	Desmoplastic small round cell tumor
P0342	Urothelial carcinoma	BRD4-NUTM1	NUT midline carcinoma
P0365	Sarcoma not otherwise specified	SDHB mutation (germline)	Gastrointestinal stromal tumor
P0375	Neuroendocrine neoplasm	CTNNB1 mutation	Desmoid fibromatosis
P0376	High-grade undifferentiated small round cell sarcoma	CIC-DUX4	High-grade undifferentiated small round cell sarcoma with CIC-DUX4 fusion
P0381	Malignant peripheral nerve sheath tumor	EWSR1-CREB3L1	Sclerosing epithelioid fibrosarcoma/low-grade myxofibrosarcoma
P0391	Carcinoma of unknown primary site	EML4-ALK	Lung adenocarcinoma
P0408	Epithelioid sarcoma	EWSR1-CREB3L1	Sclerosing epithelioid fibrosarcoma/low-grade myxofibrosarcoma
P0425	Thymoma	STAT5 mutation	T-cell lymphoma
P0440	Carcinoma of unknown primary site	IDH1 mutation	Cholangiocellular carcinoma
P0442	Malignant peripheral nerve sheath tumor	KRAS mutation	Rhabdomyosarcoma
P0459	Sarcoma not otherwise specified	High tumor mutational burden, CD274 amplification	Triple-negative breast cancer
P0470	Epithelioid hemangioendothelioma	SMARCB1 deletion	Epithelioid sarcoma
P0510	Spindle cell sarcoma	SS18-SSX1	Synovial sarcoma
P0542	Thymic carcinoma	BRD3-NUTM1	NUT midline carcinoma
P0550	Carcinoma of unknown primary site	EWSR1-WT1	Desmoplastic small round cell tumor
P0565	Carcinoma of unknown primary site	IDH1 mutation	Cholangiocellular carcinoma
P0691	Myxofibrosarcoma	EWSR1-NR4A3	Extraskeletal myxoid chondrosarcoma
P0693	Carcinoma of unknown primary site	EML4-ALK	Lung adenocarcinoma
P0772	Clear cell renal cell carcinoma	PRCC-TFE3	TFE3 translocation carcinoma
P0794	Carcinoma of unknown primary site	FGFR2-NOL4	Cholangiocellular carcinoma
P0829	Neuroendocrine carcinoma	KIT mutation	Thymic carcinoma
P0865	Spindle cell rhabdomyosarcoma	NF1 deletion, SUZ12 deletion, CDKN2A deletion	Malignant peripheral nerve sheath tumor
P0873	Carcinoma of unknown primary site	EML4-ALK	Lung adenocarcinoma
P0937	Carcinoma of unknown primary site	EWSR1-WT1	Desmoplastic small round cell tumor
P0943	Sarcoma not otherwise specified	KIT mutation	Gastrointestinal stromal tumor
P0953	Carcinoma of unknown primary site	KRAS mutation, APC mutation, FBXW7 mutation	Colorectal adenocarcinoma
P0958	Undifferentiated sarcoma	EWSR1-WT1	Desmoplastic small round cell tumor
P0960	Undifferentiated anaplastic carcinoma	EWSR1-WT1	Desmoplastic small round cell tumor
P0963	Undifferentiated sarcoma	FUS-TFCP2	Rhabdomyosarcoma
P1034	Carcinoma of unknown primary site	NSD3-NUTM1	NUT midline carcinoma
P1058	Sarcoma not otherwise specified	TPM3-ALK	Inflammatory myofibroblastic tumor
P1069	Carcinoma of unknown primary site	EWSR1-WT1	Desmoplastic small round cell tumor
P1089	Sarcoma not otherwise specified	EWSR1-WT1	Desmoplastic small round cell tumor
P1091	Hidradenocarcinoma	SS18-SSX2	Synovial sarcoma
P1093	Synovial sarcoma	FUS-CREB3L2	Low-grade myxofibrosarcoma
P1143	Sarcoma not otherwise specified	PDGFRA mutation	Gastrointestinal stromal tumor
P1146	Thymic carcinoma	High ASCL1 expression	Thymic neuroendocrine carcinoma
P1162	Carcinoma of unknown primary site	EML4-ALK	Lung adenocarcinoma
P1171	Carcinoma of unknown primary site	KIT mutation	Thymic carcinoma
P1237	T-cell lymphoma	FIP1L1-PDGFRA	Idiopathic hypereosinophilic syndrome
P1281	Carcinoma of unknown primary site	EGFR mutation	Lung adenocarcinoma
P1285	Carcinoma of unknown primary site	MXI1-NUTM1	NUT midline carcinoma

## Sheet: Supplementary Table S4
Supplementary Table S4. Rationale for genetic counseling
Patient	Cancer predisposition gene(s) affected by pathogenic germline variants	Other reasons	Inheritance
P0009	FANCL		Autosomal recessive
P0051	SDHA		Autosomal dominant
P0057	RECQL4		Autosomal recessive
P0066	ATM		Autosomal dominant
P0108	ATM		Autosomal dominant
P0118	TP53		Autosomal dominant
P0121	ERCC2		Autosomal recessive
P0121	BRCA2		Autosomal dominant
P0123	FANCC		Autosomal recessive
P0126	RAD51D		Autosomal dominant
P0132	CHEK2		Autosomal dominant
P0139	CHEK2		Autosomal dominant
P0142	MEN1		Autosomal dominant
P0142	MSH2		Autosomal dominant
P0149	FANCG		Autosomal recessive
P0151	BARD1		Autosomal dominant
P0152	BRCA2		Autosomal dominant
P0155	PALB2		Autosomal dominant
P0163	WRN		Autosomal recessive
P0169	WRN		Autosomal recessive
P0172	MSH6		Autosomal dominant
P0175	MSH6		Autosomal dominant
P0175	BRCA1		Autosomal dominant
P0183	ERCC2		Autosomal recessive
P0185	RB1		Autosomal dominant
P0197	NBN		Autosomal recessive
P0222	MLH1		Autosomal dominant
P0225	WT1		Autosomal dominant
P0242	XPA		Autosomal recessive
P0249	XPA		Autosomal recessive
P0251	PALB2		Autosomal dominant
P0252	BRCA1		Autosomal dominant
P0255	ATM		Autosomal dominant
P0268	PTEN		Autosomal dominant
P0294	BRCA1		Autosomal dominant
P0297	APC		Autosomal dominant
P0303	TSC1		Autosomal dominant
P0311	CHEK2		Autosomal dominant
P0312	BAP1		Autosomal dominant
P0343	EXT2		Autosomal dominant
P0343	CHEK2		Autosomal dominant
P0344	ATM		Autosomal dominant
P0357	FANCA		Autosomal recessive
P0365	ERCC2		Autosomal recessive
P0365	SDHB		Autosomal dominant
P0380	FLCN		Autosomal dominant
P0388	BRCA2		Autosomal dominant
P0401	BRCA1		Autosomal dominant
P0409	ERCC3		Autosomal recessive
P0428	XPA		Autosomal recessive
P0431	BRIP1		Autosomal dominant
P0433	BRCA2		Autosomal dominant
P0435	MUTYH		Autosomal recessive
P0466	FANCA		Autosomal recessive
P0471	BRCA1		Autosomal dominant
P0476	BRCA2		Autosomal dominant
P0477	BRCA2		Autosomal dominant
P0491	NBN		Autosomal recessive
P0501	BRCA1		Autosomal dominant
P0520	MSH6		Autosomal dominant
P0525	XPA		Autosomal recessive
P0536	BRCA2		Autosomal dominant
P0541	STK11		Autosomal dominant
P0544	PMS2		Autosomal dominant
P0549	BRIP1		Autosomal dominant
P0555	ERCC3		Autosomal recessive
P0560	BRCA2		Autosomal dominant
P0565	NBN		Autosomal recessive
P0577	BLM		Autosomal recessive
P0579	SDHB		Autosomal dominant
P0582	XPC		Autosomal recessive
P0589	NF1		Autosomal dominant
P0592	PALB2		Autosomal dominant
P0595	BRCA1		Autosomal dominant
P0599	TP53		Autosomal dominant
P0600	PALB2		Autosomal dominant
P0603	SDHB		Autosomal dominant
P0607	NBN		Autosomal recessive
P0612	BRCA2		Autosomal dominant
P0614	RECQL4		Autosomal recessive
P0630	CHEK2		Autosomal dominant
P0634	BRCA2		Autosomal dominant
P0641	SDHB		Autosomal dominant
P0648	ATM		Autosomal dominant
P0652	FLCN		Autosomal dominant
P0654	NBN		Autosomal recessive
P0665	TP53		Autosomal dominant
P0678	ERCC5		Autosomal recessive
P0679	ERCC3		Autosomal recessive
P0683	TP53		Autosomal dominant
P0684	CHEK2		Autosomal dominant
P0691	RET		Autosomal dominant
P0697	TP53		Autosomal dominant
P0702	BRCA2		Autosomal dominant
P0745	MEN1		Autosomal dominant
P0747	FANCA		Autosomal recessive
P0751	SDHD		Autosomal dominant
P0770	BRCA2		Autosomal dominant
P0784	WRN		Autosomal recessive
P0799	NF1		Autosomal dominant
P0804	NBN		Autosomal recessive
P0816	CHEK2		Autosomal dominant
P0638	NBN		Autosomal recessive
P0828	FANCA		Autosomal recessive
P0836	ATM		Autosomal dominant
P0836	CHEK2		Autosomal dominant
P0848	ERCC3		Autosomal recessive
P0862	TP53		Autosomal dominant
P0865	EXT2		Autosomal dominant
P0886	MEN1		Autosomal dominant
P0901	KIT		Autosomal dominant
P0908	NF1		Autosomal dominant
P0911	RECQL4		Autosomal recessive
P0917	APC		Autosomal dominant
P0925	NBN		Autosomal recessive
P0933	NF1		Autosomal dominant
P0934	ATM		Autosomal dominant
P0939	CDH1		Autosomal dominant
P0941	SDHB		Autosomal dominant
P0949	NF1		Autosomal dominant
P0953	BRCA1		Autosomal dominant
P0959	BRIP1		Autosomal dominant
P0966	PALB2		Autosomal dominant
P0968	RAD51C		Autosomal dominant
P0983	XRCC2		Autosomal recessive
P0985	MUTYH		Autosomal recessive
P0990	ERCC3		Autosomal recessive
P1000	CHEK2		Autosomal dominant
P1006	CHEK2		Autosomal dominant
P1022	BRIP1		Autosomal dominant
P1028	MUTYH		Autosomal recessive
P1030	SDHB		Autosomal dominant
P1030	CHEK2		Autosomal dominant
P1041	BRCA2		Autosomal dominant
P1043	SDHB		Autosomal dominant
P1048	ATM		Autosomal dominant
P1057	BRCA2		Autosomal dominant
P1057	XPA		Autosomal recessive
P1062	TP53		Autosomal dominant
P1067	MLH1		Autosomal dominant
P1087	BRCA1		Autosomal dominant
P1092	NBN		Autosomal recessive
P1095	XPC		Autosomal recessive
P1103	SMAD4		Autosomal dominant
P1106	MUTYH		Autosomal recessive
P1113	TP53		Autosomal dominant
P1114	ERCC4		Autosomal recessive
P1141	ATM		Autosomal dominant
P1142	RB1		Autosomal dominant
P1148	BRCA2		Autosomal dominant
P1177	TP53		Autosomal dominant
P1182	BRCA1		Autosomal dominant
P1188	TP53		Autosomal dominant
P1188	BAP1		Autosomal dominant
P1188	NBN		Autosomal recessive
P1226	CDH1		Autosomal dominant
P1228	MUTYH		Autosomal recessive
P1232	APC		Autosomal dominant
P1233	ATM		Autosomal dominant
P1243	WRN		Autosomal recessive
P1263	PALB2		Autosomal dominant
P1277	CDKN2A		Autosomal dominant
P1278	RECQL4		Autosomal recessive
P1279	FANCI		Autosomal recessive
P1279	ERCC2		Autosomal recessive
P1293	TP53		Autosomal dominant
P1310	CHEK2		Autosomal dominant
P0049		Age
P0488		Age
P0505		Age
P0567		Age
P0824		Entity
P1127		Entity
P1266		Age

## Sheet: Supplementary Table S5
Supplementary Table S5. Patient characteristics, biomarkers, and molecular tumor board recommendations
Patient	Sex	Age	Subcohort	ICD-10	ICD-O-3	Date of molecular tumor board	Tumor mutational burden	Treatment basket	NCT/DKTK evidence level	ESCAT tier	Priority	Single-agent or combination therapy	Biomarker	Function	Somatic or Germlineermline alteration	Alteration	Biomarker basket	RNA data available
P001	F	40	Breast	C50	8500	2014-10-24	38	PAM	m2B	III-B	1	Single-agent	NF1	Loss-of-function	Somatic	SNV/indel	RME	No
P001	F	40	Breast	C50	8500	2014-10-24	38	PAM	m2B	III-B	1	Single-agent	TSC2	Loss-of-function	Somatic	Deletion	PAM	No
P002	M	70	Leiomyosarcoma	C48	8890	2013-11-08	39	RME	m4	III-B	1	Single-agent	WNK2	Loss-of-function	Somatic	SNV/indel	RME	No
P003	F	60	Other	C45	9052	2014-09-19	88	OTH	m3	IV-A	1	Single-agent	ERCC4	Loss-of-function	Somatic	SNV/indel	DDR	No
P004	M	42	NSCLC	C34	8980	2013-08-02	142	PAM	m3	IV-A	1	Single-agent	PTEN	Loss-of-function	Somatic	SNV/indel	PAM	No
P005	M	49	Colorectal	C19	8140	2014-09-19	153	NA	NA	NA	NA	NA	NA	NA	NA	NA	NA	Yes
P006	F	22	Neuroendocrine and Adrenal	C25	8151	2015-07-03	4	NA	NA	NA	NA	NA	NA	NA	NA	NA	NA	Yes
P007	F	36	Ewing/PNET	C49	9364	2015-05-15	57	DDR,OTH	m3	IV-A	1	Combination	BRCA1	Loss-of-function	Somatic	Deletion	DDR	Yes
P007	F	36	Ewing/PNET	C49	9364	2015-05-15	57	DDR,OTH	m3	IV-A	1	Combination	CDK12	Loss-of-function	Somatic	Deletion	DDR	Yes
P007	F	36	Ewing/PNET	C49	9364	2015-05-15	57	DDR,OTH	m3	IV-A	1	Combination	RAD51	Loss-of-function	Somatic	Deletion	DDR	Yes
P007	F	36	Ewing/PNET	C49	9364	2015-05-15	57	TK	m3	IV-A	2	Single-agent	ABL1	Gain-of-function	Somatic	Overexpression	RME	Yes
P007	F	36	Ewing/PNET	C49	9364	2015-05-15	57	TK	m3	IV-A	2	Single-agent	FGFR4	Gain-of-function	Somatic	Gain	TK	Yes
P007	F	36	Ewing/PNET	C49	9364	2015-05-15	57	TK	m3	IV-A	2	Single-agent	KIT	Gain-of-function	Somatic	Overexpression	TK	Yes
P007	F	36	Ewing/PNET	C49	9364	2015-05-15	57	RME	m3	IV-A	2	Single-agent	NF1	Loss-of-function	Somatic	Deletion	RME	Yes
P007	F	36	Ewing/PNET	C49	9364	2015-05-15	57	PAM	m3	IV-A	3	Single-agent	NF1	Loss-of-function	Somatic	Deletion	RME	Yes
P008	F	23	Colorectal	C18	8490	2015-03-13	96	NA	NA	NA	NA	NA	NA	NA	NA	NA	NA	No
P009	F	26	Bone	C41	9220	2015-11-27	25	DDR,OTH	m3	IV-A	1	Combination	RECQL	Loss-of-function	Somatic	SNV/indel	DDR	No
P009	F	26	Bone	C41	9220	2015-11-27	25	CC	m2C	NA	2	Single-agent	CDKN2A	Loss-of-function	Somatic	Deletion	CC	No
P009	F	26	Bone	C41	9220	2015-11-27	25	CC	m2C	NA	2	Single-agent	CDKN2B	Loss-of-function	Somatic	Deletion	CC	No
P009	F	26	Bone	C41	9220	2015-11-27	25	NA	NA	NA	NA	NA	FANCL	Loss-of-function	Germline	NA	DDR	No
P010	F	20	Soft Tissue Other	C49	9758	2014-07-18	8	TK	m4	X	1	Single-agent	JAK1	Gain-of-function	Somatic	Overexpression	TK	Yes
P010	F	20	Soft Tissue Other	C49	9758	2014-07-18	8	TK	m4	X	1	Single-agent	JAK2	Gain-of-function	Somatic	Overexpression	TK	Yes
P010	F	20	Soft Tissue Other	C49	9758	2014-07-18	8	TK	m4	X	1	Single-agent	OSM	Gain-of-function	Somatic	SNV/indel	OTH	Yes
P011	F	42	Breast	C50	8500	2015-01-09	61	TK	m4	X	1	Single-agent	RET	Gain-of-function	Somatic	Gain	TK	Yes
P011	F	42	Breast	C50	8500	2015-01-09	61	TK	m4	X	1	Single-agent	RET	Gain-of-function	Somatic	Overexpression	TK	Yes
P011	F	42	Breast	C50	8500	2015-01-09	61	DDR	m3	X	2	Single-agent	BRCA2	Loss-of-function	Somatic	Deletion	DDR	Yes
P012	M	34	Urologic	C62	9065	2016-03-18	107	IE	m2B	III-A	1	Single-agent	TMB	Composite biomarker	Somatic	Positive	IE	Yes
P012	M	34	Urologic	C62	9065	2016-03-18	107	TK	m4	X	2	Single-agent	FGFR2	Gain-of-function	Somatic	SNV/indel	TK	Yes
P012	M	34	Urologic	C62	9065	2016-03-18	107	TK	m4	X	2	Single-agent	FGFR3	Gain-of-function	Somatic	Overexpression	TK	Yes
P012	M	34	Urologic	C62	9065	2016-03-18	107	TK	m4	X	2	Single-agent	FGFR4	Gain-of-function	Somatic	Overexpression	TK	Yes
P013	M	44	Colorectal	C18	8140	2014-05-09	73	NA	NA	NA	NA	NA	NA	NA	NA	NA	NA	No
P014	M	42	GIST	C17	8936	2015-07-10	9	TK	m3	III-B	1	Single-agent	NF1	Loss-of-function	Somatic	SNV/indel	RME	Yes
P014	M	42	GIST	C17	8936	2015-07-10	9	TK	m3	III-B	1	Single-agent	NF1	Loss-of-function	Germline	SNV/indel	RME	Yes
P014	M	42	GIST	C17	8936	2015-07-10	9	PAM	m3	III-B	1	Single-agent	NF1	Loss-of-function	Germline	SNV/indel	RME	Yes
P014	M	42	GIST	C17	8936	2015-07-10	9	PAM	m3	III-B	1	Single-agent	NF1	Loss-of-function	Somatic	SNV/indel	RME	Yes
P014	M	42	GIST	C17	8936	2015-07-10	9	DDR	m4	IV-B	2	Single-agent	BRCA1	Loss-of-function	Somatic	Underexpression	DDR	Yes
P014	M	42	GIST	C17	8936	2015-07-10	9	DDR	m4	IV-B	2	Single-agent	RAD51	Loss-of-function	Somatic	Deletion	DDR	Yes
P014	M	42	GIST	C17	8936	2015-07-10	9	CC	m3	IV-A	3	Single-agent	CDKN2A	Loss-of-function	Somatic	Deletion	CC	Yes
P015	F	18	Soft Tissue Other	C48	9581	2015-03-13	4	TK	m4	X	1	Single-agent	FLT1	Gain-of-function	Somatic	Overexpression	TK	Yes
P015	F	18	Soft Tissue Other	C48	9581	2015-03-13	4	TK	m4	X	1	Single-agent	VEGFA	Gain-of-function	Somatic	Overexpression	TK	Yes
P015	F	18	Soft Tissue Other	C48	9581	2015-03-13	4	TK	m4	X	1	Single-agent	VEGFB	Gain-of-function	Somatic	Overexpression	TK	Yes
P015	F	18	Soft Tissue Other	C48	9581	2015-03-13	4	TK	m4	X	1	Single-agent	MET	Gain-of-function	Somatic	Overexpression	TK	Yes
P016	F	57	Hematopoietic	C91	9834	2014-10-24	35	TK	m3	IV-A	1	Single-agent	FGFR1	Gain-of-function	Somatic	Gain	TK	No
P017	M	50	Urologic	C64	8312	2018-07-20	9	IE	m2B	III-A	1	Single-agent	CSF1R	Gain-of-function	Somatic	Overexpression	TK	Yes
P017	M	50	Urologic	C64	8312	2018-07-20	9	IE	m2B	III-A	1	Single-agent	CTLA4	Gain-of-function	Somatic	Overexpression	IE	Yes
P017	M	50	Urologic	C64	8312	2018-07-20	9	IE	m2B	III-A	1	Single-agent	PDCD1	Gain-of-function	Somatic	Overexpression	IE	Yes
P017	M	50	Urologic	C64	8312	2018-07-20	9	IE	m2B	III-A	1	Single-agent	PDCD1LG2	Gain-of-function	Somatic	Overexpression	IE	Yes
P018	F	37	Ewing/PNET	C80	8041	2017-09-01	50	RME,RME	m2B	III-A	1	Combination	BRAF	Gain-of-function	Somatic	SNV/indel	RME	Yes
P018	F	37	Ewing/PNET	C80	8041	2017-09-01	50	CC	m3	IV-A	2	Single-agent	CCNE1	Gain-of-function	Somatic	Overexpression	CC	Yes
P018	F	37	Ewing/PNET	C80	8041	2017-09-01	50	CC	m3	IV-A	2	Single-agent	CCNE1	Gain-of-function	Somatic	Gain	CC	Yes
P018	F	37	Ewing/PNET	C80	8041	2017-09-01	50	CC	m3	IV-A	2	Single-agent	CCNE1	Gain-of-function	Somatic	Overexpression	CC	Yes
P018	F	37	Ewing/PNET	C80	8041	2017-09-01	50	CC	m3	IV-A	2	Single-agent	CCNE1	Gain-of-function	Somatic	Gain	CC	Yes
P019	M	23	Hematopoietic	C77	9930	2017-06-16	48	TK	m2C	NA	1	Single-agent	JAK1	Gain-of-function	Somatic	SNV/indel	TK	Yes
P019	M	23	Hematopoietic	C77	9930	2017-06-16	48	OTH	m2C	NA	1	Single-agent	STAT5B	Gain-of-function	Somatic	SNV/indel	OTH	Yes
P019	M	23	Hematopoietic	C77	9930	2017-06-16	48	PAM	m3	IV-A	2	Single-agent	JAK1	Gain-of-function	Somatic	SNV/indel	TK	Yes
P019	M	23	Hematopoietic	C77	9930	2017-06-16	48	PAM	m3	IV-A	2	Single-agent	STAT5B	Gain-of-function	Somatic	SNV/indel	OTH	Yes
P020	F	50	Unknown Primary	C79	8140	2018-03-02	34	OTH	m2C	NA	1	Single-agent	IDH1	Gain-of-function	Somatic	SNV/indel	OTH	Yes
P020	F	50	Unknown Primary	C79	8140	2018-03-02	34	OTH	m2C	NA	1	Single-agent	KRAS	Gain-of-function	Somatic	SNV/indel	RME	Yes
P020	F	50	Unknown Primary	C79	8140	2018-03-02	34	RME	m3	IV-A	2	Single-agent	KRAS	Gain-of-function	Somatic	SNV/indel	RME	Yes
P020	F	50	Unknown Primary	C79	8140	2018-03-02	34	DDR	m2B	III-B	3	Single-agent	ATM	Loss-of-function	Somatic	Deletion	DDR	Yes
P020	F	50	Unknown Primary	C79	8140	2018-03-02	34	DDR	m2B	III-B	3	Single-agent	CHEK1	Loss-of-function	Somatic	Deletion	DDR	Yes
P020	F	50	Unknown Primary	C79	8140	2018-03-02	34	DDR	m2B	III-B	3	Single-agent	CHEK2	Loss-of-function	Somatic	Deletion	DDR	Yes
P020	F	50	Unknown Primary	C79	8140	2018-03-02	34	DDR	m2B	III-B	3	Single-agent	FANCA	Loss-of-function	Somatic	Deletion	DDR	Yes
P020	F	50	Unknown Primary	C79	8140	2018-03-02	34	DDR	m2B	III-B	3	Single-agent	FANCD2	Loss-of-function	Somatic	Deletion	DDR	Yes
P020	F	50	Unknown Primary	C79	8140	2018-03-02	34	DDR	m2B	III-B	3	Single-agent	IDH1	Gain-of-function	Somatic	SNV/indel	OTH	Yes
P020	F	50	Unknown Primary	C79	8140	2018-03-02	34	DDR	m2B	III-B	3	Single-agent	MRE11	Loss-of-function	Somatic	Deletion	DDR	Yes
P020	F	50	Unknown Primary	C79	8140	2018-03-02	34	DDR	m2B	III-B	3	Single-agent	RAD51	Loss-of-function	Somatic	Deletion	DDR	Yes
P020	F	50	Unknown Primary	C79	8140	2018-03-02	34	DDR	m2B	III-B	3	Single-agent	RAD51B	Loss-of-function	Somatic	Deletion	DDR	Yes
P020	F	50	Unknown Primary	C79	8140	2018-03-02	34	DDR	m2B	III-B	3	Single-agent	SBS8	Composite biomarker	Somatic	Mutational signature	DDR	Yes
P020	F	50	Unknown Primary	C79	8140	2018-03-02	34	TK	m2B	IV-A	4	Single-agent	FGFR2	Gain-of-function	Somatic	Overexpression	TK	Yes
P020	F	50	Unknown Primary	C79	8140	2018-03-02	34	TK	m2B	IV-A	4	Single-agent	FGFR3	Gain-of-function	Somatic	Overexpression	TK	Yes
P020	F	50	Unknown Primary	C79	8140	2018-03-02	34	TK	m2B	IV-A	4	Single-agent	FGFR4	Gain-of-function	Somatic	Overexpression	TK	Yes
P020	F	50	Unknown Primary	C79	8140	2018-03-02	34	RME,CC	m2C	NA	5	Combination	CDKN2A	Loss-of-function	Somatic	Deletion	CC	Yes
P020	F	50	Unknown Primary	C79	8140	2018-03-02	34	RME,CC	m2C	NA	5	Combination	CDKN2A	Loss-of-function	Somatic	Underexpression	CC	Yes
P020	F	50	Unknown Primary	C79	8140	2018-03-02	34	RME,CC	m2C	NA	5	Combination	CDKN2B	Loss-of-function	Somatic	Deletion	CC	Yes
P020	F	50	Unknown Primary	C79	8140	2018-03-02	34	RME,CC	m2C	NA	5	Combination	CDKN2B	Loss-of-function	Somatic	Underexpression	CC	Yes
P021	M	19	Hematopoietic	C83	9680	2017-03-03	254	IE	m2B	III-A	1	Single-agent	CD274	Gain-of-function	Somatic	Gain	IE	Yes
P021	M	19	Hematopoietic	C83	9680	2017-03-03	254	IE	m2B	III-A	1	Single-agent	PDCD1LG2	Gain-of-function	Somatic	Gain	IE	Yes
P021	M	19	Hematopoietic	C83	9680	2017-03-03	254	IE	m2B	III-A	1	Single-agent	TMB	Composite biomarker	Somatic	Positive	IE	Yes
P021	M	19	Hematopoietic	C83	9680	2017-03-03	254	TK	m3	IV-A	3	Single-agent	NA	NA	NA	NA	NA	Yes
P021	M	19	Hematopoietic	C83	9680	2017-03-03	254	OTH	m3	IV-A	2	Single-agent	ARID1A	Loss-of-function	Somatic	SNV/indel	OTH	Yes
P022	F	37	Breast	C50	8500	2015-06-18	83	NA	NA	NA	NA	NA	NA	NA	NA	NA	NA	Yes
P023	M	25	Soft Tissue Other	C49	8840	2017-12-08	25	DDR,OTH	m2B	III-A	1	Combination	BRCA2	Loss-of-function	Somatic	Underexpression	DDR	Yes
P023	M	25	Soft Tissue Other	C49	8840	2017-12-08	25	DDR,OTH	m2B	III-A	1	Combination	BRCA2	Loss-of-function	Somatic	Deletion	DDR	Yes
P023	M	25	Soft Tissue Other	C49	8840	2017-12-08	25	DDR,OTH	m2B	III-A	1	Combination	BRIP1	Loss-of-function	Somatic	Underexpression	DDR	Yes
P023	M	25	Soft Tissue Other	C49	8840	2017-12-08	25	DDR,OTH	m2B	III-A	1	Combination	CHEK2	Loss-of-function	Somatic	Deletion	DDR	Yes
P023	M	25	Soft Tissue Other	C49	8840	2017-12-08	25	DDR,OTH	m2B	III-A	1	Combination	CHEK2	Loss-of-function	Somatic	Underexpression	DDR	Yes
P023	M	25	Soft Tissue Other	C49	8840	2017-12-08	25	DDR,OTH	m2B	III-A	1	Combination	FANCA	Loss-of-function	Somatic	Underexpression	DDR	Yes
P023	M	25	Soft Tissue Other	C49	8840	2017-12-08	25	DDR,OTH	m2B	III-A	1	Combination	FANCC	Loss-of-function	Somatic	Underexpression	DDR	Yes
P023	M	25	Soft Tissue Other	C49	8840	2017-12-08	25	DDR,OTH	m2B	III-A	1	Combination	FANCC	Loss-of-function	Somatic	Deletion	DDR	Yes
P023	M	25	Soft Tissue Other	C49	8840	2017-12-08	25	DDR,OTH	m2B	III-A	1	Combination	FANCD2	Loss-of-function	Somatic	Underexpression	DDR	Yes
P023	M	25	Soft Tissue Other	C49	8840	2017-12-08	25	DDR,OTH	m2B	III-A	1	Combination	RAD51AP1	Loss-of-function	Somatic	Underexpression	DDR	Yes
P023	M	25	Soft Tissue Other	C49	8840	2017-12-08	25	DDR,OTH	m2B	III-A	1	Combination	SBS3	Composite biomarker	Somatic	Mutational signature	DDR	Yes
P023	M	25	Soft Tissue Other	C49	8840	2017-12-08	25	DDR,OTH	m2B	III-A	1	Combination	STK36	Loss-of-function	Somatic	SNV/indel	DEV	Yes
P023	M	25	Soft Tissue Other	C49	8840	2017-12-08	25	PAM,TK	m2B	III-A	2	Combination	NA	NA	NA	NA	NA	Yes
P023	M	25	Soft Tissue Other	C49	8840	2017-12-08	25	TK	m1A	I-A	3	Single-agent	FGFR1	Gain-of-function	Somatic	Overexpression	TK	Yes
P023	M	25	Soft Tissue Other	C49	8840	2017-12-08	25	TK	m1A	I-A	3	Single-agent	FYN	Gain-of-function	Somatic	Overexpression	TK	Yes
P023	M	25	Soft Tissue Other	C49	8840	2017-12-08	25	TK	m1A	I-A	3	Single-agent	GAK	Gain-of-function	Somatic	Overexpression	CC	Yes
P023	M	25	Soft Tissue Other	C49	8840	2017-12-08	25	TK	m1A	I-A	3	Single-agent	PDGFA	Gain-of-function	Somatic	Overexpression	TK	Yes
P023	M	25	Soft Tissue Other	C49	8840	2017-12-08	25	TK	m1A	I-A	3	Single-agent	PDGFRA	Gain-of-function	Somatic	Overexpression	TK	Yes
P023	M	25	Soft Tissue Other	C49	8840	2017-12-08	25	TK	m1A	I-A	3	Single-agent	ROR1	Gain-of-function	Somatic	Overexpression	TK	Yes
P023	M	25	Soft Tissue Other	C49	8840	2017-12-08	25	CC	m2B	III-A	4	Single-agent	CDKN2A	Loss-of-function	Somatic	Deletion	CC	Yes
P023	M	25	Soft Tissue Other	C49	8840	2017-12-08	25	CC	m2B	III-A	4	Single-agent	CDKN2A	Loss-of-function	Somatic	Underexpression	CC	Yes
P023	M	25	Soft Tissue Other	C49	8840	2017-12-08	25	CC	m2B	III-A	4	Single-agent	CDKN2B	Loss-of-function	Somatic	Deletion	CC	Yes
P023	M	25	Soft Tissue Other	C49	8840	2017-12-08	25	CC	m2B	III-A	4	Single-agent	CDKN2B	Loss-of-function	Somatic	Underexpression	CC	Yes
P023	M	25	Soft Tissue Other	C49	8840	2017-12-08	25	CC	m2B	III-A	4	Single-agent	RB1	Loss-of-function	Somatic	Underexpression	CC	Yes
P023	M	25	Soft Tissue Other	C49	8840	2017-12-08	25	CC	m2B	III-A	4	Single-agent	RB1	Loss-of-function	Somatic	Deletion	CC	Yes
P023	M	25	Soft Tissue Other	C49	8840	2017-12-08	25	PAM	m2B	III-A	5	Single-agent	MTOR	Gain-of-function	Somatic	Underexpression	PAM	Yes
P023	M	25	Soft Tissue Other	C49	8840	2017-12-08	25	PAM	m2B	III-A	5	Single-agent	MTOR	Gain-of-function	Somatic	SNV/indel	PAM	Yes
P023	M	25	Soft Tissue Other	C49	8840	2017-12-08	25	PAM	m2B	III-A	5	Single-agent	NF2	Loss-of-function	Somatic	Deletion	PAM	Yes
P023	M	25	Soft Tissue Other	C49	8840	2017-12-08	25	PAM	m2B	III-A	5	Single-agent	RPTOR	Gain-of-function	Somatic	Overexpression	PAM	Yes
P023	M	25	Soft Tissue Other	C49	8840	2017-12-08	25	PAM	m2B	III-A	5	Single-agent	TSC1	Loss-of-function	Somatic	Deletion	PAM	Yes
P024	M	55	Soft Tissue Other	C08	8980	2016-12-02	155	IE	m2B	III-A	1	Single-agent	TMB	Composite biomarker	Somatic	Positive	IE	Yes
P024	M	55	Soft Tissue Other	C08	8980	2016-12-02	155	TK	m2B	III-A	2	Single-agent	FGFR1	Gain-of-function	Somatic	Overexpression	TK	Yes
P024	M	55	Soft Tissue Other	C08	8980	2016-12-02	155	TK	m2B	III-A	2	Single-agent	KDR	Gain-of-function	Somatic	Gain	TK	Yes
P024	M	55	Soft Tissue Other	C08	8980	2016-12-02	155	TK	m2B	III-A	2	Single-agent	KIT	Gain-of-function	Somatic	Gain	TK	Yes
P024	M	55	Soft Tissue Other	C08	8980	2016-12-02	155	TK	m2B	III-A	2	Single-agent	PDGFA	Gain-of-function	Somatic	Overexpression	TK	Yes
P024	M	55	Soft Tissue Other	C08	8980	2016-12-02	155	TK	m2B	III-A	2	Single-agent	PDGFRA	Gain-of-function	Somatic	Overexpression	TK	Yes
P024	M	55	Soft Tissue Other	C08	8980	2016-12-02	155	TK	m2B	III-A	2	Single-agent	PDGFRA	Gain-of-function	Somatic	Gain	TK	Yes
P024	M	55	Soft Tissue Other	C08	8980	2016-12-02	155	DDR	m3	IV-A	3	Single-agent	ERCC5	Loss-of-function	Somatic	Deletion	DDR	Yes
P024	M	55	Soft Tissue Other	C08	8980	2016-12-02	155	DDR	m3	IV-A	3	Single-agent	FANCB	Loss-of-function	Somatic	Deletion	DDR	Yes
P024	M	55	Soft Tissue Other	C08	8980	2016-12-02	155	DDR	m3	IV-A	3	Single-agent	SBS3	Composite biomarker	Somatic	Mutational signature	DDR	Yes
P024	M	55	Soft Tissue Other	C08	8980	2016-12-02	155	DDR	m3	IV-A	3	Single-agent	XRCC5	Gain-of-function	Somatic	Deletion	NA	Yes
P024	M	55	Soft Tissue Other	C08	8980	2016-12-02	155	PAM	m2B	III-A	4	Single-agent	PTEN	Loss-of-function	Somatic	SNV/indel	PAM	Yes
P025	F	48	Soft Tissue Other	C49	9133	2015-04-10	33	TK	m3	IV-A	1	Single-agent	ERG	Gain-of-function	Somatic	Overexpression	OTH	Yes
P025	F	48	Soft Tissue Other	C49	9133	2015-04-10	33	TK	m3	IV-A	1	Single-agent	FGF4	Gain-of-function	Somatic	Overexpression	TK	Yes
P025	F	48	Soft Tissue Other	C49	9133	2015-04-10	33	TK	m3	IV-A	1	Single-agent	FLT1	Gain-of-function	Somatic	Overexpression	TK	Yes
P025	F	48	Soft Tissue Other	C49	9133	2015-04-10	33	TK	m3	IV-A	1	Single-agent	KIT	Gain-of-function	Somatic	Gain	TK	Yes
P025	F	48	Soft Tissue Other	C49	9133	2015-04-10	33	TK	m3	IV-A	1	Single-agent	PDGFA	Gain-of-function	Somatic	Overexpression	TK	Yes
P025	F	48	Soft Tissue Other	C49	9133	2015-04-10	33	TK	m3	IV-A	1	Single-agent	PDGFRA	Gain-of-function	Somatic	Gain	TK	Yes
P025	F	48	Soft Tissue Other	C49	9133	2015-04-10	33	TK	m3	IV-A	1	Single-agent	PDGFRA	Gain-of-function	Somatic	Overexpression	TK	Yes
P025	F	48	Soft Tissue Other	C49	9133	2015-04-10	33	TK	m3	IV-A	1	Single-agent	PDGFRB	Gain-of-function	Somatic	Overexpression	TK	Yes
P026	M	26	Hepatopancreaticobiliary	C22	8140	2017-05-26	191	IE	m2B	III-A	1	Single-agent	CD274	Gain-of-function	Somatic	Overexpression	IE	Yes
P026	M	26	Hepatopancreaticobiliary	C22	8140	2017-05-26	191	IE	m2B	III-A	1	Single-agent	TMB	Composite biomarker	NA	Positive	IE	Yes
P026	M	26	Hepatopancreaticobiliary	C22	8140	2017-05-26	191	DDR	m3	IV-A	2	Single-agent	ATM	Loss-of-function	Somatic	SNV/indel	DDR	Yes
P026	M	26	Hepatopancreaticobiliary	C22	8140	2017-05-26	191	DDR	m3	IV-A	2	Single-agent	BRCA2	Loss-of-function	Somatic	Deletion	DDR	Yes
P026	M	26	Hepatopancreaticobiliary	C22	8140	2017-05-26	191	DDR	m3	IV-A	2	Single-agent	SBS3	Composite biomarker	NA	Mutational signature	DDR	Yes
P027	M	67	Head and Neck	C07	8500	2018-07-03	76	TK	m2B	I-C	1	Single-agent	ERBB2	Gain-of-function	Somatic	Overexpression	TK	Yes
P027	M	67	Head and Neck	C07	8500	2018-07-03	76	TK	m2B	I-C	1	Single-agent	ERBB3	Gain-of-function	Somatic	SNV/indel	TK	Yes
P027	M	67	Head and Neck	C07	8500	2018-07-03	76	TK	m2B	I-C	1	Single-agent	ERBB3	Gain-of-function	Somatic	Overexpression	TK	Yes
P027	M	67	Head and Neck	C07	8500	2018-07-03	76	TK	m2B	I-C	1	Single-agent	ERBB4	Gain-of-function	Somatic	Overexpression	TK	Yes
P027	M	67	Head and Neck	C07	8500	2018-07-03	76	PAM	m2B	I-C	2	Single-agent	AKT1	Gain-of-function	Somatic	Overexpression	PAM	Yes
P027	M	67	Head and Neck	C07	8500	2018-07-03	76	PAM	m2B	I-C	2	Single-agent	NF1	Loss-of-function	Somatic	SNV/indel	RME	Yes
P027	M	67	Head and Neck	C07	8500	2018-07-03	76	PAM	m2B	I-C	2	Single-agent	PIK3R1	Loss-of-function	Somatic	Overexpression	PAM	Yes
P027	M	67	Head and Neck	C07	8500	2018-07-03	76	RME	m3	IV-A	2	Single-agent	NF1	Loss-of-function	Somatic	SNV/indel	RME	Yes
P027	M	67	Head and Neck	C07	8500	2018-07-03	76	RME	m3	IV-A	2	Single-agent	WNK2	Loss-of-function	Somatic	SNV/indel	RME	Yes
P027	M	67	Head and Neck	C07	8500	2018-07-03	76	DEV	m3	IV-A	3	Single-agent	SHH	Gain-of-function	Somatic	Overexpression	DEV	Yes
P027	M	67	Head and Neck	C07	8500	2018-07-03	76	DEV	m3	IV-A	3	Single-agent	SHH	Gain-of-function	Somatic	Gain	DEV	Yes
P028	F	41	Breast	C50	8500	2018-02-02	74	OTH	m1B	III-B	4	Single-agent	NA	NA	NA	NA	NA	No
P028	F	41	Breast	C50	8500	2018-02-02	74	IE,DDR	m2B	III-A	1	Combination	HRD	Composite biomarker	Somatic	Positive	DDR	No
P028	F	41	Breast	C50	8500	2018-02-02	74	IE,DDR	m2B	III-A	1	Combination	SBS3	Composite biomarker	Somatic	Mutational signature	DDR	No
P028	F	41	Breast	C50	8500	2018-02-02	74	IE,DDR	m2B	III-A	1	Combination	TMB	Composite biomarker	Somatic	Positive	IE	No
P028	F	41	Breast	C50	8500	2018-02-02	74	DDR,OTH	m2A	III-B	2	Combination	HRD	Composite biomarker	Somatic	Positive	DDR	No
P028	F	41	Breast	C50	8500	2018-02-02	74	DDR,OTH	m2A	III-B	2	Combination	SBS3	Composite biomarker	Somatic	Mutational signature	DDR	No
P028	F	41	Breast	C50	8500	2018-02-02	74	DDR	m2A	III-B	3	Single-agent	HRD	Composite biomarker	Somatic	Positive	DDR	No
P028	F	41	Breast	C50	8500	2018-02-02	74	DDR	m2A	III-B	3	Single-agent	SBS3	Composite biomarker	Somatic	Mutational signature	DDR	No
P029	F	38	Soft Tissue Other	C50	9120	2016-08-26	19	TK	m4	X	1	Single-agent	RAF1	Gain-of-function	Somatic	Overexpression	RME	Yes
P029	F	38	Soft Tissue Other	C50	9120	2016-08-26	19	TK	m4	X	2	Single-agent	FLT1	Gain-of-function	Somatic	Overexpression	TK	Yes
P029	F	38	Soft Tissue Other	C50	9120	2016-08-26	19	TK	m4	X	2	Single-agent	KDR	Gain-of-function	Somatic	Overexpression	TK	Yes
P029	F	38	Soft Tissue Other	C50	9120	2016-08-26	19	TK	m4	X	2	Single-agent	PTPN12	Loss-of-function	Somatic	Overexpression	TK	Yes
P030	F	47	Hepatopancreaticobiliary	C22	8160	2018-10-12	60	NA	NA	NA	NA	NA	NA	NA	NA	NA	NA	Yes
P031	M	65	Breast	C50	8500	2014-08-15	115	DDR	m2B	III-B	1	Single-agent	BRCA1	Loss-of-function	Somatic	Deletion	DDR	No
P031	M	65	Breast	C50	8500	2014-08-15	115	RME	m3	IV-A	2	Single-agent	PDGFRA	Gain-of-function	Somatic	Gain	TK	No
P031	M	65	Breast	C50	8500	2014-08-15	115	RME	m3	IV-A	2	Single-agent	RAF1	Gain-of-function	Somatic	Gain	RME	No
P031	M	65	Breast	C50	8500	2014-08-15	115	TK	m4	X	3	Single-agent	FGF1	Gain-of-function	Somatic	SNV/indel	TK	No
P032	F	38	Neuroendocrine and Adrenal	C11	8246	2015-03-13	178	IE	m2B	I-C	2	Single-agent	TMB	Composite biomarker	NA	Positive	IE	Yes
P032	F	38	Neuroendocrine and Adrenal	C11	8246	2015-03-13	178	PAM	m2B	III-A	1	Single-agent	MTOR	Gain-of-function	Somatic	Gain	PAM	Yes
P032	F	38	Neuroendocrine and Adrenal	C11	8246	2015-03-13	178	PAM	m2B	III-A	1	Single-agent	TSC1	Loss-of-function	Somatic	Deletion	PAM	Yes
P033	M	76	Upper Gastrointestinal	C16	8490	2018-09-21	83	TK	m3	IV-A	1	Single-agent	ERBB2	Gain-of-function	Somatic	SNV/indel	TK	No
P033	M	76	Upper Gastrointestinal	C16	8490	2018-09-21	83	TK	m2B	III-A	2	Single-agent	CCND1	Gain-of-function	Somatic	Gain	CC	No
P033	M	76	Upper Gastrointestinal	C16	8490	2018-09-21	83	TK	m2B	III-A	2	Single-agent	FGF3	Gain-of-function	Somatic	Gain	TK	No
P033	M	76	Upper Gastrointestinal	C16	8490	2018-09-21	83	TK	m2B	III-A	2	Single-agent	FGF4	Gain-of-function	Somatic	Gain	TK	No
P033	M	76	Upper Gastrointestinal	C16	8490	2018-09-21	83	CC	m2C	NA	3	Single-agent	MDM2	Gain-of-function	Somatic	Gain	CC	No
P034	F	17	Head and Neck	C07	8200	2017-06-30	32	DDR,OTH	m4	X	2	Combination	SBS8	Composite biomarker	Somatic	Mutational signature	DDR	Yes
P034	F	17	Head and Neck	C07	8200	2017-06-30	32	TK	m2C	NA	1	Single-agent	FGFR1	Gain-of-function	Somatic	Overexpression	TK	Yes
P034	F	17	Head and Neck	C07	8200	2017-06-30	32	TK	m2C	NA	1	Single-agent	FGFR2	Gain-of-function	Somatic	Overexpression	TK	Yes
P034	F	17	Head and Neck	C07	8200	2017-06-30	32	TK	m2C	NA	1	Single-agent	PDGFA	Gain-of-function	Somatic	Overexpression	TK	Yes
P034	F	17	Head and Neck	C07	8200	2017-06-30	32	TK	m2C	NA	1	Single-agent	PDGFRA	Gain-of-function	Somatic	Overexpression	TK	Yes
P034	F	17	Head and Neck	C07	8200	2017-06-30	32	TK	m2C	NA	1	Single-agent	ROS1	Gain-of-function	Somatic	Overexpression	TK	Yes
P034	F	17	Head and Neck	C07	8200	2017-06-30	32	OTH	m4	X	3	Single-agent	MYB	Gain-of-function	Somatic	Fusion	OTH	Yes
P034	F	17	Head and Neck	C07	8200	2017-06-30	32	OTH	m4	X	3	Single-agent	NFIB	Gain-of-function	Somatic	Fusion	OTH	Yes
P035	M	48	Soft Tissue Other	C03	8912	2018-11-16	29	TK	m2B	III-B	1	Single-agent	ALK	Gain-of-function	Somatic	Overexpression	TK	Yes
P035	M	48	Soft Tissue Other	C03	8912	2018-11-16	29	TK	m2B	III-B	1	Single-agent	MET	Gain-of-function	Somatic	Overexpression	TK	Yes
P035	M	48	Soft Tissue Other	C03	8912	2018-11-16	29	PAM	m2B	III-B	2	Single-agent	FBXW7	Loss-of-function	Somatic	Deletion	PAM	Yes
P035	M	48	Soft Tissue Other	C03	8912	2018-11-16	29	PAM	m2B	III-B	2	Single-agent	PBRM1	Loss-of-function	Somatic	SNV/indel	OTH	Yes
P035	M	48	Soft Tissue Other	C03	8912	2018-11-16	29	CC	m2C	NA	3	Single-agent	CDKN2A	Loss-of-function	Somatic	Underexpression	CC	Yes
P035	M	48	Soft Tissue Other	C03	8912	2018-11-16	29	CC	m2C	NA	3	Single-agent	CDKN2A	Loss-of-function	Somatic	Deletion	CC	Yes
P035	M	48	Soft Tissue Other	C03	8912	2018-11-16	29	CC	m2C	NA	3	Single-agent	CDKN2B	Loss-of-function	Somatic	Underexpression	CC	Yes
P035	M	48	Soft Tissue Other	C03	8912	2018-11-16	29	CC	m2C	NA	3	Single-agent	CDKN2B	Loss-of-function	Somatic	Deletion	CC	Yes
P035	M	48	Soft Tissue Other	C03	8912	2018-11-16	29	path	NA	NA	NA	NA	NA	NA	NA	NA	NA	Yes
P036	M	26	Soft Tissue Other	C49	8802	2015-10-30	43	DDR,OTH	m3	IV-A	1	Combination	ERCC4	Loss-of-function	Somatic	Deletion	DDR	No
P036	M	26	Soft Tissue Other	C49	8802	2015-10-30	43	DDR,OTH	m3	IV-A	1	Combination	FANCA	Loss-of-function	Somatic	Deletion	DDR	No
P036	M	26	Soft Tissue Other	C49	8802	2015-10-30	43	DDR,OTH	m3	IV-A	1	Combination	FANCF	Loss-of-function	Somatic	Deletion	DDR	No
P036	M	26	Soft Tissue Other	C49	8802	2015-10-30	43	DDR,OTH	m3	IV-A	1	Combination	FANCG	Loss-of-function	Somatic	Deletion	DDR	No
P036	M	26	Soft Tissue Other	C49	8802	2015-10-30	43	DDR,OTH	m3	IV-A	1	Combination	PALB2	Loss-of-function	Somatic	Deletion	DDR	No
P036	M	26	Soft Tissue Other	C49	8802	2015-10-30	43	PAM	m2C	NA	2	Single-agent	PIK3CA	Gain-of-function	Somatic	Gain	PAM	No
P036	M	26	Soft Tissue Other	C49	8802	2015-10-30	43	PAM	m2C	NA	2	Single-agent	TSC2	Loss-of-function	Somatic	Deletion	PAM	No
P036	M	26	Soft Tissue Other	C49	8802	2015-10-30	43	DEV	m4	X	3	Single-agent	PTCH1	Loss-of-function	Somatic	Deletion	DEV	No
P037	M	19	Soft Tissue Other	C49	9581	2015-05-15	5	RME,RME	m4	X	1	Combination	ARAF	Gain-of-function	Somatic	Gain	RME	Yes
P037	M	19	Soft Tissue Other	C49	9581	2015-05-15	5	TK	m4	X	1	Single-agent	FLT1	Gain-of-function	Somatic	Overexpression	TK	Yes
P037	M	19	Soft Tissue Other	C49	9581	2015-05-15	5	TK	m4	X	1	Single-agent	KDR	Gain-of-function	Somatic	Overexpression	TK	Yes
P038	M	33	Neuroendocrine and Adrenal	C25	8246	2017-07-07	266	IE	m2B	I-C	1	Single-agent	MSH2	Loss-of-function	Somatic	SNV/indel	DDR	Yes
P038	M	33	Neuroendocrine and Adrenal	C25	8246	2017-07-07	266	IE	m2B	I-C	1	Single-agent	TMB	Composite biomarker	Somatic	Positive	IE	Yes
P039	M	43	Hepatopancreaticobiliary	C23	8560	2017-07-07	37	CC	m2B	III-A	1	Single-agent	CDK4	Gain-of-function	Somatic	Overexpression	CC	Yes
P039	M	43	Hepatopancreaticobiliary	C23	8560	2017-07-07	37	CC	m2B	III-A	1	Single-agent	CDK4	Gain-of-function	Somatic	Gain	CC	Yes
P039	M	43	Hepatopancreaticobiliary	C23	8560	2017-07-07	37	CC	m2C	NA	2	Single-agent	MDM2	Gain-of-function	Somatic	Overexpression	CC	Yes
P039	M	43	Hepatopancreaticobiliary	C23	8560	2017-07-07	37	CC	m2C	NA	2	Single-agent	MDM2	Gain-of-function	Somatic	Gain	CC	Yes
P040	F	33	Head and Neck	C80	8020	2017-08-04	35	NA	NA	NA	NA	NA	NA	NA	NA	NA	NA	No
P041	M	51	NSCLC	C34	8140	2014-10-24	67	NA	NA	NA	NA	NA	NA	NA	NA	NA	NA	Yes
P042	M	61	Soft Tissue Other	C49	8815	2014-05-09	25	TK	m3	IV-A	1	Single-agent	NAB2	NA	Somatic	Fusion	OTH	Yes
P042	M	61	Soft Tissue Other	C49	8815	2014-05-09	25	TK	m3	IV-A	1	Single-agent	STAT6	Gain-of-function	Somatic	Fusion	OTH	Yes
P043	F	59	Soft Tissue Other	C44	8832	2018-11-16	70	TK	m2C	NA	1	Single-agent	COL1A1	Gain-of-function	Somatic	Overexpression	NA	Yes
P043	F	59	Soft Tissue Other	C44	8832	2018-11-16	70	TK	m2C	NA	1	Single-agent	COL1A1	Gain-of-function	Somatic	Fusion	NA	Yes
P043	F	59	Soft Tissue Other	C44	8832	2018-11-16	70	TK	m2C	NA	1	Single-agent	FLT4	Gain-of-function	Somatic	Gain	TK	Yes
P043	F	59	Soft Tissue Other	C44	8832	2018-11-16	70	TK	m2C	NA	1	Single-agent	PDGFB	Gain-of-function	Somatic	Fusion	TK	Yes
P043	F	59	Soft Tissue Other	C44	8832	2018-11-16	70	TK	m2C	NA	1	Single-agent	PDGFB	Gain-of-function	Somatic	Overexpression	TK	Yes
P043	F	59	Soft Tissue Other	C44	8832	2018-11-16	70	DDR	m2B	III-B	2	Single-agent	ATR	Loss-of-function	Somatic	Deletion	DDR	Yes
P043	F	59	Soft Tissue Other	C44	8832	2018-11-16	70	DDR	m2B	III-B	2	Single-agent	ATR	Loss-of-function	Somatic	Underexpression	DDR	Yes
P043	F	59	Soft Tissue Other	C44	8832	2018-11-16	70	DDR	m2B	III-B	2	Single-agent	HRD	Composite biomarker	Somatic	Positive	DDR	Yes
P043	F	59	Soft Tissue Other	C44	8832	2018-11-16	70	DDR	m2B	III-B	2	Single-agent	SBS3	Composite biomarker	Somatic	Mutational signature	DDR	Yes
P043	F	59	Soft Tissue Other	C44	8832	2018-11-16	70	DDR	m2B	III-B	2	Single-agent	STK36	Loss-of-function	Somatic	SNV/indel	DEV	Yes
P044	F	30	Neuroendocrine and Adrenal	C74	8370	2017-09-08	72	PAM	m3	IV-A	1	Single-agent	NF2	Loss-of-function	Somatic	Deletion	PAM	No
P044	F	30	Neuroendocrine and Adrenal	C74	8370	2017-09-08	72	DDR	m3	IV-A	2	Single-agent	RAD51D	Loss-of-function	Germline	SNV/indel	DDR	No
P044	F	30	Neuroendocrine and Adrenal	C74	8370	2017-09-08	72	DDR	m3	IV-A	2	Single-agent	RECQL	Loss-of-function	Germline	SNV/indel	DDR	No
P044	F	30	Neuroendocrine and Adrenal	C74	8370	2017-09-08	72	DDR	m3	IV-A	2	Single-agent	SBS3	Composite biomarker	Somatic	Mutational signature	DDR	No
P044	F	30	Neuroendocrine and Adrenal	C74	8370	2017-09-08	72	RME	m3	IV-A	3	Single-agent	NF2	Loss-of-function	Somatic	Deletion	PAM	No
P045	M	31	Hepatopancreaticobiliary	C22	8010	2016-02-19	17	TK	m2C	NA	1	Single-agent	FGF1	Gain-of-function	Somatic	Overexpression	TK	Yes
P045	M	31	Hepatopancreaticobiliary	C22	8010	2016-02-19	17	TK	m2C	NA	1	Single-agent	FGFR2	Gain-of-function	Somatic	Overexpression	TK	Yes
P045	M	31	Hepatopancreaticobiliary	C22	8010	2016-02-19	17	TK	m2C	NA	1	Single-agent	FGFR2	Gain-of-function	Somatic	Fusion	TK	Yes
P045	M	31	Hepatopancreaticobiliary	C22	8010	2016-02-19	17	TK	m2C	NA	1	Single-agent	FGFR3	Gain-of-function	Somatic	Overexpression	TK	Yes
P045	M	31	Hepatopancreaticobiliary	C22	8010	2016-02-19	17	TK	m2C	NA	1	Single-agent	FGFR4	Gain-of-function	Somatic	Overexpression	TK	Yes
P045	M	31	Hepatopancreaticobiliary	C22	8010	2016-02-19	17	TK	m2C	NA	1	Single-agent	WAC	Gain-of-function	Somatic	Overexpression	NA	Yes
P045	M	31	Hepatopancreaticobiliary	C22	8010	2016-02-19	17	TK	m2C	NA	1	Single-agent	WAC	Gain-of-function	Somatic	Fusion	NA	Yes
P045	M	31	Hepatopancreaticobiliary	C22	8010	2016-02-19	17	CC	m4	X	2	Single-agent	CDKN2A	Loss-of-function	Somatic	Deletion	CC	Yes
P045	M	31	Hepatopancreaticobiliary	C22	8010	2016-02-19	17	CC	m4	X	2	Single-agent	CDKN2A	Loss-of-function	Somatic	Underexpression	CC	Yes
P046	M	55	Soft Tissue Other	C49	8801	2017-06-09	105	DDR,OTH	m3	IV-A	2	Combination	BRCA1	Loss-of-function	Somatic	SNV/indel	DDR	Yes
P046	M	55	Soft Tissue Other	C49	8801	2017-06-09	105	DDR,OTH	m3	IV-A	2	Combination	FANCB	Loss-of-function	Somatic	Deletion	DDR	Yes
P046	M	55	Soft Tissue Other	C49	8801	2017-06-09	105	DDR,OTH	m3	IV-A	2	Combination	FANCC	Loss-of-function	Somatic	Deletion	DDR	Yes
P046	M	55	Soft Tissue Other	C49	8801	2017-06-09	105	DDR,OTH	m3	IV-A	2	Combination	FANCF	Loss-of-function	Somatic	Deletion	DDR	Yes
P046	M	55	Soft Tissue Other	C49	8801	2017-06-09	105	DDR,OTH	m3	IV-A	2	Combination	SBS3	Composite biomarker	Somatic	Mutational signature	DDR	Yes
P046	M	55	Soft Tissue Other	C49	8801	2017-06-09	105	TK	m4	X	1	Single-agent	PDGFA	Gain-of-function	Somatic	Gain	TK	Yes
P046	M	55	Soft Tissue Other	C49	8801	2017-06-09	105	TK	m4	X	1	Single-agent	PDGFRA	Gain-of-function	Germline	SNV/indel	TK	Yes
P046	M	55	Soft Tissue Other	C49	8801	2017-06-09	105	IE	m2B	III-B	3	Single-agent	CTAG1B	Gain-of-function	Somatic	Overexpression	IE	Yes
P047	F	64	Hepatopancreaticobiliary	C25	8140	2014-05-09	53	NA	NA	NA	NA	NA	NA	NA	NA	NA	NA	No
P048	F	34	Breast	C50	8500	2016-10-07	147	CC	m2C	NA	2	Single-agent	BAP1	Loss-of-function	Somatic	Deletion	DDR	No
P048	F	34	Breast	C50	8500	2016-10-07	147	CC	m2C	NA	2	Single-agent	RAD51D	Loss-of-function	Somatic	Deletion	DDR	No
P048	F	34	Breast	C50	8500	2016-10-07	147	CC	m2C	NA	2	Single-agent	SBS3	Composite biomarker	Somatic	Mutational signature	DDR	No
P048	F	34	Breast	C50	8500	2016-10-07	147	DDR	m3	IV-A	1	Single-agent	CDK6	Gain-of-function	Somatic	Gain	CC	No
P048	F	34	Breast	C50	8500	2016-10-07	147	DDR	m3	IV-A	1	Single-agent	CDKN2A	Loss-of-function	Somatic	Deletion	CC	No
P049	F	40	Breast	C50	8500	2018-07-20	227	IE	m2B	III-A	1	Single-agent	CD274	Gain-of-function	Somatic	Gain	IE	No
P049	F	40	Breast	C50	8500	2018-07-20	227	IE	m2B	III-A	1	Single-agent	PDCD1LG2	Gain-of-function	Somatic	Gain	IE	No
P049	F	40	Breast	C50	8500	2018-07-20	227	IE	m2B	III-A	1	Single-agent	PTEN	Loss-of-function	Somatic	Fusion	PAM	No
P049	F	40	Breast	C50	8500	2018-07-20	227	IE	m2B	III-A	1	Single-agent	RNLS	Loss-of-function	Somatic	Fusion	NA	No
P049	F	40	Breast	C50	8500	2018-07-20	227	IE	m2B	III-A	1	Single-agent	TMB	Composite biomarker	Somatic	Positive	IE	No
P049	F	40	Breast	C50	8500	2018-07-20	227	DDR	m2C	NA	2	Single-agent	HRD	Composite biomarker	Somatic	Positive	DDR	No
P049	F	40	Breast	C50	8500	2018-07-20	227	DDR	m2C	NA	2	Single-agent	PTEN	Loss-of-function	Somatic	Fusion	PAM	No
P049	F	40	Breast	C50	8500	2018-07-20	227	DDR	m2C	NA	2	Single-agent	RNLS	Loss-of-function	Somatic	Fusion	NA	No
P049	F	40	Breast	C50	8500	2018-07-20	227	DDR	m2C	NA	2	Single-agent	SBS3	Composite biomarker	Somatic	Mutational signature	DDR	No
P049	F	40	Breast	C50	8500	2018-07-20	227	PAM	m1B	II-A	3	Single-agent	PIK3CA	Gain-of-function	Somatic	Gain	PAM	No
P049	F	40	Breast	C50	8500	2018-07-20	227	PAM	m1B	II-A	3	Single-agent	PTEN	Loss-of-function	Somatic	Fusion	PAM	No
P049	F	40	Breast	C50	8500	2018-07-20	227	PAM	m1B	II-A	3	Single-agent	RNLS	Loss-of-function	Somatic	Fusion	NA	No
P049	F	40	Breast	C50	8500	2018-07-20	227	NA	NA	NA	NA	NA	NA	NA	Germline	NA	NA	No
P050	M	49	Urologic	C61	8140	2017-06-30	25	NA	NA	NA	NA	NA	NA	NA	NA	NA	NA	No
P051	F	51	GIST	C26	8936	2017-10-13	22	TK	m1B	II-A	1	Single-agent	FGF2	Gain-of-function	Somatic	Overexpression	TK	Yes
P051	F	51	GIST	C26	8936	2017-10-13	22	TK	m1B	II-A	1	Single-agent	FGF3	Gain-of-function	Somatic	Overexpression	TK	Yes
P051	F	51	GIST	C26	8936	2017-10-13	22	TK	m1B	II-A	1	Single-agent	FGF4	Gain-of-function	Somatic	Overexpression	TK	Yes
P051	F	51	GIST	C26	8936	2017-10-13	22	TK	m1B	II-A	1	Single-agent	SDHA	Loss-of-function	Germline	SNV/indel	OTH	Yes
P051	F	51	GIST	C26	8936	2017-10-13	22	TK	m4	X	2	Single-agent	NRG3	Gain-of-function	Somatic	Overexpression	TK	Yes
P051	F	51	GIST	C26	8936	2017-10-13	22	NA	NA	NA	NA	NA	SDHA	Loss-of-function	Germline	NA	OTH	Yes
P052	M	56	Hematopoietic	C91	9837	2018-07-20	32	TK	m3	IV-A	1	Single-agent	JAK3	Gain-of-function	Somatic	SNV/indel	TK	No
P052	M	56	Hematopoietic	C91	9837	2018-07-20	32	DDR	m3	IV-A	2	Single-agent	ATM	Loss-of-function	Somatic	SNV/indel	DDR	No
P052	M	56	Hematopoietic	C91	9837	2018-07-20	32	DDR	m3	IV-A	2	Single-agent	SBS3	Composite biomarker	Somatic	Mutational signature	DDR	No
P053	F	60	Soft Tissue Other	C49	8815	2018-04-20	27	TK	m2C	NA	1	Single-agent	FGF2	Gain-of-function	Somatic	Overexpression	TK	Yes
P053	F	60	Soft Tissue Other	C49	8815	2018-04-20	27	TK	m2C	NA	1	Single-agent	FGFR1	Gain-of-function	Somatic	Overexpression	TK	Yes
P053	F	60	Soft Tissue Other	C49	8815	2018-04-20	27	IE	m2B	III-A	2	Single-agent	CTLA4	Gain-of-function	Somatic	Deletion	IE	Yes
P053	F	60	Soft Tissue Other	C49	8815	2018-04-20	27	IE	m2B	III-A	2	Single-agent	CTLA4	Gain-of-function	Somatic	Underexpression	IE	Yes
P053	F	60	Soft Tissue Other	C49	8815	2018-04-20	27	IE	m2B	III-A	2	Single-agent	LAG3	Gain-of-function	Somatic	Overexpression	IE	Yes
P053	F	60	Soft Tissue Other	C49	8815	2018-04-20	27	IE	m2B	III-A	2	Single-agent	PDCD1LG2	Gain-of-function	Somatic	Overexpression	IE	Yes
P053	F	60	Soft Tissue Other	C49	8815	2018-04-20	27	TK	m4	X	4	Single-agent	ERBB4	Gain-of-function	Somatic	Overexpression	TK	Yes
P053	F	60	Soft Tissue Other	C49	8815	2018-04-20	27	TK	m4	X	4	Single-agent	NRG2	Gain-of-function	Somatic	Overexpression	TK	Yes
P053	F	60	Soft Tissue Other	C49	8815	2018-04-20	27	TK,TK	m2C	NA	3	Combination	ERBB4	Gain-of-function	Somatic	Overexpression	TK	Yes
P053	F	60	Soft Tissue Other	C49	8815	2018-04-20	27	TK,TK	m2C	NA	3	Combination	NRG2	Gain-of-function	Somatic	Overexpression	TK	Yes
P054	F	48	Upper Gastrointestinal	C16	8140	2018-06-29	9	IE	m4	X	1	Single-agent	PDCD1	Gain-of-function	Somatic	Overexpression	IE	Yes
P054	F	48	Upper Gastrointestinal	C16	8140	2018-06-29	9	TK	m4	X	2	Single-agent	HGF	Gain-of-function	Somatic	SNV/indel	TK	Yes
P054	F	48	Upper Gastrointestinal	C16	8140	2018-06-29	9	OTH	m1B	II-A	3	Single-agent	CLDN18	Gain-of-function	Somatic	Overexpression	IE	Yes
P055	F	45	Hepatopancreaticobiliary	C22	8160	2015-09-18	61	DDR	m3	IV-A	1	Single-agent	PALB2	Loss-of-function	Somatic	SNV/indel	DDR	Yes
P056	M	59	Soft Tissue Other	C64	8714	2017-04-28	32	PAM	m1B	II-A	1	Single-agent	TSC2	Loss-of-function	Somatic	SNV/indel	PAM	Yes
P056	M	59	Soft Tissue Other	C64	8714	2017-04-28	32	TK	m4	X	2	Single-agent	ABL1	Gain-of-function	Somatic	Overexpression	RME	Yes
P057	F	31	Head and Neck	C11	8200	2018-06-05	29	OTH	m3	IV-A	1	Single-agent	MYB	Gain-of-function	Somatic	Fusion	OTH	Yes
P057	F	31	Head and Neck	C11	8200	2018-06-05	29	OTH	m3	IV-A	1	Single-agent	NFIB	Gain-of-function	Somatic	Fusion	OTH	Yes
P057	F	31	Head and Neck	C11	8200	2018-06-05	29	TK	m2A	I-C	2	Single-agent	FGFR1	Gain-of-function	Somatic	Overexpression	TK	Yes
P057	F	31	Head and Neck	C11	8200	2018-06-05	29	TK	m2A	I-C	2	Single-agent	KIT	Gain-of-function	Somatic	Overexpression	TK	Yes
P057	F	31	Head and Neck	C11	8200	2018-06-05	29	TK	m2A	I-C	2	Single-agent	PDGFA	Gain-of-function	Somatic	Overexpression	TK	Yes
P057	F	31	Head and Neck	C11	8200	2018-06-05	29	NA	NA	NA	NA	NA	RECQL4	Loss-of-function	Germline	NA	DDR	Yes
P058	M	41	NSCLC	C34	8140	2018-08-17	79	IE,DDR	m1B	III-A	1	Combination	FANCC	Loss-of-function	Somatic	Deletion	DDR	Yes
P058	M	41	NSCLC	C34	8140	2018-08-17	79	IE,DDR	m1B	III-A	1	Combination	FANCC	Loss-of-function	Somatic	SNV/indel	DDR	Yes
P058	M	41	NSCLC	C34	8140	2018-08-17	79	IE,DDR	m1B	III-A	1	Combination	HRD	Composite biomarker	Somatic	Positive	DDR	Yes
P058	M	41	NSCLC	C34	8140	2018-08-17	79	IE,DDR	m1B	III-A	1	Combination	MSI	Composite biomarker	Somatic	MSI	NA	Yes
P058	M	41	NSCLC	C34	8140	2018-08-17	79	IE,DDR	m1B	III-A	1	Combination	SBS3	Composite biomarker	Somatic	Mutational signature	DDR	Yes
P058	M	41	NSCLC	C34	8140	2018-08-17	79	IE,DDR	m1B	III-A	1	Combination	XRCC2	Loss-of-function	Somatic	SNV/indel	DDR	Yes
P058	M	41	NSCLC	C34	8140	2018-08-17	79	DDR,OTH	m2C	X	2	Combination	ASCL1	Gain-of-function	Somatic	Overexpression	OTH	Yes
P058	M	41	NSCLC	C34	8140	2018-08-17	79	DDR,OTH	m2C	X	2	Combination	BRD2	Gain-of-function	Somatic	Overexpression	OTH	Yes
P058	M	41	NSCLC	C34	8140	2018-08-17	79	DDR,OTH	m2C	X	2	Combination	BRD4	Gain-of-function	Somatic	Overexpression	OTH	Yes
P058	M	41	NSCLC	C34	8140	2018-08-17	79	DDR,OTH	m2C	X	2	Combination	MYC	Gain-of-function	Somatic	Gain	CC	Yes
P058	M	41	NSCLC	C34	8140	2018-08-17	79	DDR,OTH	m2C	X	2	Combination	MYC	Gain-of-function	Somatic	Overexpression	CC	Yes
P058	M	41	NSCLC	C34	8140	2018-08-17	79	OTH	m3	IV-A	3	Single-agent	MAGEA3	Gain-of-function	Somatic	Overexpression	IE	Yes
P058	M	41	NSCLC	C34	8140	2018-08-17	79	OTH	m3	IV-A	3	Single-agent	MSI	Composite biomarker	Somatic	MSI	NA	Yes
P058	M	41	NSCLC	C34	8140	2018-08-17	79	IE,IE	m2C	NA	4	Combination	CD274	Gain-of-function	Somatic	Underexpression	IE	Yes
P058	M	41	NSCLC	C34	8140	2018-08-17	79	OTH	m2B	III-A	1	Single-agent	FANCC	Loss-of-function	Somatic	Deletion	DDR	Yes
P058	M	41	NSCLC	C34	8140	2018-08-17	79	OTH	m2B	III-A	1	Single-agent	FANCC	Loss-of-function	Somatic	SNV/indel	DDR	Yes
P058	M	41	NSCLC	C34	8140	2018-08-17	79	OTH	m2B	III-A	1	Single-agent	HRD	Composite biomarker	Somatic	Positive	DDR	Yes
P058	M	41	NSCLC	C34	8140	2018-08-17	79	OTH	m2B	III-A	1	Single-agent	SBS3	Composite biomarker	Somatic	Mutational signature	DDR	Yes
P058	M	41	NSCLC	C34	8140	2018-08-17	79	OTH	m2B	III-A	1	Single-agent	XRCC2	Loss-of-function	Somatic	SNV/indel	DDR	Yes
P059	F	46	Colorectal	C18	8140	2017-04-21	138	IE	m2B	III-A	1	Single-agent	TMB	Composite biomarker	NA	Positive	IE	Yes
P059	F	46	Colorectal	C18	8140	2017-04-21	138	RME,TK	m3	IV-A	2	Combination	ERBB3	Gain-of-function	Somatic	Overexpression	TK	Yes
P059	F	46	Colorectal	C18	8140	2017-04-21	138	RME,TK	m3	IV-A	2	Combination	KRAS	Gain-of-function	Somatic	SNV/indel	RME	Yes
P060	M	40	Head and Neck	C31	8070	2017-08-04	87	IE	m2B	I-C	1	Single-agent	CD274	Gain-of-function	Somatic	Overexpression	IE	Yes
P060	M	40	Head and Neck	C31	8070	2017-08-04	87	IE	m2B	I-C	1	Single-agent	CTLA4	Gain-of-function	Somatic	Overexpression	IE	Yes
P060	M	40	Head and Neck	C31	8070	2017-08-04	87	IE	m2B	I-C	1	Single-agent	PDCD1LG2	Gain-of-function	Somatic	Overexpression	IE	Yes
P060	M	40	Head and Neck	C31	8070	2017-08-04	87	CC	m2C	IV-A	2	Single-agent	CDKN2A	Loss-of-function	Somatic	SNV/indel	CC	Yes
P060	M	40	Head and Neck	C31	8070	2017-08-04	87	CC	m2C	IV-A	2	Single-agent	NFE2L2	Loss-of-function	Somatic	SNV/indel	NA	Yes
P060	M	40	Head and Neck	C31	8070	2017-08-04	87	PAM	m2B	I-C	3	Single-agent	PTEN	Loss-of-function	Somatic	Deletion	PAM	Yes
P061	M	43	Hepatopancreaticobiliary	C25	8500	2014-08-15	53	NA	NA	NA	NA	NA	NA	NA	NA	NA	NA	Yes
P062	F	40	Colorectal	C20	8140	2017-02-17	377	NA	NA	NA	NA	NA	NA	NA	NA	NA	NA	Yes
P063	M	65	GIST	C17	8936	2016-05-13	35	TK	m3	IV-A	1	Single-agent	FGFR1	Gain-of-function	Somatic	Overexpression	TK	Yes
P063	M	65	GIST	C17	8936	2016-05-13	35	TK	m3	IV-A	1	Single-agent	KIT	Gain-of-function	Somatic	SNV/indel	TK	Yes
P064	F	48	Colorectal	C18	8480	2015-04-24	91	NA	NA	NA	NA	NA	NA	NA	NA	NA	NA	Yes
P065	M	47	Bone	C41	9370	2018-06-08	59	IE	m2B	III-A	1	Single-agent	CD274	Gain-of-function	Somatic	Overexpression	IE	Yes
P065	M	47	Bone	C41	9370	2018-06-08	59	IE	m2B	III-A	1	Single-agent	CTLA4	Gain-of-function	Somatic	Overexpression	IE	Yes
P065	M	47	Bone	C41	9370	2018-06-08	59	IE	m2B	III-A	1	Single-agent	LAG3	Gain-of-function	Somatic	Overexpression	IE	Yes
P065	M	47	Bone	C41	9370	2018-06-08	59	IE	m2B	III-A	1	Single-agent	PDCD1	Gain-of-function	Somatic	Overexpression	IE	Yes
P065	M	47	Bone	C41	9370	2018-06-08	59	IE	m2B	III-A	1	Single-agent	PDCD1LG2	Gain-of-function	Somatic	Overexpression	IE	Yes
P065	M	47	Bone	C41	9370	2018-06-08	59	CC	m2B	III-A	1	Single-agent	CDKN2A	Loss-of-function	Somatic	SNV/indel	CC	Yes
P065	M	47	Bone	C41	9370	2018-06-08	59	DDR	m3	IV-A	2	Single-agent	SBS3	Composite biomarker	NA	Mutational signature	DDR	Yes
P065	M	47	Bone	C41	9370	2018-06-08	59	DDR	m3	IV-A	2	Single-agent	SLFN11	Gain-of-function	Somatic	Overexpression	DDR	Yes
P065	M	47	Bone	C41	9370	2018-06-08	59	PAM	m3	IV-A	3	Single-agent	STK11	Loss-of-function	Somatic	SNV/indel	PAM	Yes
P065	M	47	Bone	C41	9370	2018-06-08	59	OTH	m3	IV-A	4	Single-agent	FASLG	Gain-of-function	Somatic	Overexpression	RME	Yes
P066	F	55	Soft Tissue Other	C08	8980	2018-04-20	169	IE	m2B	III-A	1	Single-agent	TMB	Composite biomarker	Somatic	Positive	IE	Yes
P066	F	55	Soft Tissue Other	C08	8980	2018-04-20	169	DDR,OTH	m2B	III-A	2	Combination	ATM	Loss-of-function	Germline	SNV/indel	DDR	Yes
P066	F	55	Soft Tissue Other	C08	8980	2018-04-20	169	DDR,OTH	m2B	III-A	2	Combination	HRD	Composite biomarker	Somatic	Positive	DDR	Yes
P066	F	55	Soft Tissue Other	C08	8980	2018-04-20	169	DDR,OTH	m2B	III-A	2	Combination	SBS3	Composite biomarker	Somatic	Mutational signature	DDR	Yes
P066	F	55	Soft Tissue Other	C08	8980	2018-04-20	169	TK	m4	IV-B	3	Single-agent	MET	Gain-of-function	Somatic	SNV/indel	TK	Yes
P066	F	55	Soft Tissue Other	C08	8980	2018-04-20	169	TK	m4	IV-B	3	Single-agent	MET	Gain-of-function	Somatic	Deletion	TK	Yes
P066	F	55	Soft Tissue Other	C08	8980	2018-04-20	169	OTH	m3	III-A	4	Single-agent	ARID1A	Loss-of-function	Somatic	Deletion	OTH	Yes
P066	F	55	Soft Tissue Other	C08	8980	2018-04-20	169	OTH	m3	III-A	4	Single-agent	ARID1A	Loss-of-function	Somatic	SNV/indel	OTH	Yes
P066	F	55	Soft Tissue Other	C08	8980	2018-04-20	169	NA	NA	NA	NA	NA	ATM	Loss-of-function	Germline	NA	DDR	Yes
P067	F	39	Breast	C50	8500	2015-04-24	74	NA	NA	NA	NA	NA	NA	NA	NA	NA	NA	Yes
P068	F	40	Colorectal	C18	8140	2018-07-20	232	IE,RME	m2C	NA	1	Combination	KRAS	Gain-of-function	Somatic	SNV/indel	RME	Yes
P068	F	40	Colorectal	C18	8140	2018-07-20	232	IE,RME	m2C	NA	1	Combination	TMB	Composite biomarker	Somatic	Positive	IE	Yes
P068	F	40	Colorectal	C18	8140	2018-07-20	232	RME,TK	m3	IV-A	2	Combination	ERBB3	Gain-of-function	Somatic	Overexpression	TK	Yes
P068	F	40	Colorectal	C18	8140	2018-07-20	232	RME,TK	m3	IV-A	2	Combination	KRAS	Gain-of-function	Somatic	SNV/indel	RME	Yes
P068	F	40	Colorectal	C18	8140	2018-07-20	232	PAM	m3	IV-A	3	Single-agent	PIK3CA	Gain-of-function	Somatic	SNV/indel	PAM	Yes
P068	F	40	Colorectal	C18	8140	2018-07-20	232	RME	m3	IV-A	4	Single-agent	KRAS	Gain-of-function	Somatic	SNV/indel	RME	Yes
P069	F	44	Breast	C50	8500	2015-11-13	66	CC	m3	III-A	1	Single-agent	CDK4	Gain-of-function	Somatic	Gain	CC	Yes
P070	F	51	Hepatopancreaticobiliary	C25	8453	2018-06-05	15	IE,RME	m3	IV-A	1	Combination	KRAS	Gain-of-function	Somatic	SNV/indel	RME	No
P070	F	51	Hepatopancreaticobiliary	C25	8453	2018-06-05	15	IE,RME	m3	IV-A	1	Combination	SMAD4	Loss-of-function	Somatic	Deletion	DEV	No
P070	F	51	Hepatopancreaticobiliary	C25	8453	2018-06-05	15	IE,RME	m3	IV-A	1	Combination	TP53	Loss-of-function	Somatic	SNV/indel	CC	No
P070	F	51	Hepatopancreaticobiliary	C25	8453	2018-06-05	15	RME	m3	IV-A	2	Single-agent	KRAS	Gain-of-function	Somatic	SNV/indel	RME	No
P070	F	51	Hepatopancreaticobiliary	C25	8453	2018-06-05	15	RME	m3	IV-A	2	Single-agent	SMAD4	Loss-of-function	Somatic	Deletion	DEV	No
P070	F	51	Hepatopancreaticobiliary	C25	8453	2018-06-05	15	RME	m3	IV-A	2	Single-agent	TP53	Loss-of-function	Somatic	SNV/indel	CC	No
P071	F	56	Hepatopancreaticobiliary	C25	8500	2014-03-28	26	NA	NA	NA	NA	NA	NA	NA	NA	NA	NA	Yes
P072	M	39	Other	C71	9440	2018-10-05	44	NA	NA	NA	NA	NA	NA	NA	NA	NA	NA	No
P073	M	50	Bone	C40	9240	2016-04-08	33	DDR	m4	X	1	Single-agent	PALB2	Loss-of-function	Somatic	SNV/indel	DDR	No
P073	M	50	Bone	C40	9240	2016-04-08	33	DDR	m4	X	1	Single-agent	SBS3	Composite biomarker	Somatic	Mutational signature	DDR	No
P074	F	33	Colorectal	C18	8480	2017-02-10	104	TK,TK	m3	IV-A	1	Combination	ERBB2	Gain-of-function	Somatic	Gain	TK	Yes
P074	F	33	Colorectal	C18	8480	2017-02-10	104	TK,TK	m3	IV-A	1	Combination	ERBB2	Gain-of-function	Somatic	Overexpression	TK	Yes
P074	F	33	Colorectal	C18	8480	2017-02-10	104	TK,TK	m3	IV-A	1	Combination	ERBB3	Gain-of-function	Somatic	Gain	TK	Yes
P074	F	33	Colorectal	C18	8480	2017-02-10	104	TK,TK	m3	IV-A	1	Combination	ERBB3	Gain-of-function	Somatic	Overexpression	TK	Yes
P075	M	46	Colorectal	C18	8210	2015-09-04	79	RME,TK	m3	IV-A	1	Combination	KRAS	Gain-of-function	Somatic	SNV/indel	RME	No
P075	M	46	Colorectal	C18	8210	2015-09-04	79	DDR	m4	X	2	Single-agent	NA	NA	NA	NA	NA	No
P076	F	48	Breast	C50	8500	2015-05-15	32	NA	NA	NA	NA	NA	NA	NA	NA	NA	NA	Yes
P077	M	62	Leiomyosarcoma	C67	8890	2018-07-11	56	IE	m1B	II-A	1	Single-agent	CD274	Gain-of-function	Somatic	Gain	IE	Yes
P077	M	62	Leiomyosarcoma	C67	8890	2018-07-11	56	IE	m1B	II-A	1	Single-agent	CD274	Gain-of-function	Somatic	Overexpression	IE	Yes
P077	M	62	Leiomyosarcoma	C67	8890	2018-07-11	56	IE	m1B	II-A	1	Single-agent	PDCD1LG2	Gain-of-function	Somatic	Gain	IE	Yes
P077	M	62	Leiomyosarcoma	C67	8890	2018-07-11	56	IE	m1B	II-A	1	Single-agent	PDCD1LG2	Gain-of-function	Somatic	Overexpression	IE	Yes
P077	M	62	Leiomyosarcoma	C67	8890	2018-07-11	56	DDR,OTH	m2B	III-A	2	Combination	ATM	Loss-of-function	Somatic	Deletion	DDR	Yes
P077	M	62	Leiomyosarcoma	C67	8890	2018-07-11	56	DDR,OTH	m2B	III-A	2	Combination	ATM	Loss-of-function	Somatic	Underexpression	DDR	Yes
P077	M	62	Leiomyosarcoma	C67	8890	2018-07-11	56	DDR,OTH	m2B	III-A	2	Combination	BRCA2	Loss-of-function	Somatic	Deletion	DDR	Yes
P077	M	62	Leiomyosarcoma	C67	8890	2018-07-11	56	DDR,OTH	m2B	III-A	2	Combination	BRCA2	Loss-of-function	Somatic	Underexpression	DDR	Yes
P077	M	62	Leiomyosarcoma	C67	8890	2018-07-11	56	DDR,OTH	m2B	III-A	2	Combination	CHEK1	Loss-of-function	Somatic	Underexpression	DDR	Yes
P077	M	62	Leiomyosarcoma	C67	8890	2018-07-11	56	DDR,OTH	m2B	III-A	2	Combination	CHEK1	Loss-of-function	Somatic	Deletion	DDR	Yes
P077	M	62	Leiomyosarcoma	C67	8890	2018-07-11	56	DDR,OTH	m2B	III-A	2	Combination	CHEK2	Loss-of-function	Somatic	Deletion	DDR	Yes
P077	M	62	Leiomyosarcoma	C67	8890	2018-07-11	56	DDR,OTH	m2B	III-A	2	Combination	CHEK2	Loss-of-function	Somatic	Underexpression	DDR	Yes
P077	M	62	Leiomyosarcoma	C67	8890	2018-07-11	56	DDR,OTH	m2B	III-A	2	Combination	FANCA	Loss-of-function	Somatic	Underexpression	DDR	Yes
P077	M	62	Leiomyosarcoma	C67	8890	2018-07-11	56	DDR,OTH	m2B	III-A	2	Combination	FANCA	Loss-of-function	Somatic	Deletion	DDR	Yes
P077	M	62	Leiomyosarcoma	C67	8890	2018-07-11	56	DDR,OTH	m2B	III-A	2	Combination	HRD	Composite biomarker	Somatic	Positive	DDR	Yes
P077	M	62	Leiomyosarcoma	C67	8890	2018-07-11	56	DDR,OTH	m2B	III-A	2	Combination	MRE11	Loss-of-function	Somatic	Underexpression	DDR	Yes
P077	M	62	Leiomyosarcoma	C67	8890	2018-07-11	56	DDR,OTH	m2B	III-A	2	Combination	MRE11	Loss-of-function	Somatic	Deletion	DDR	Yes
P077	M	62	Leiomyosarcoma	C67	8890	2018-07-11	56	DDR,OTH	m2B	III-A	2	Combination	SBS3	Composite biomarker	Somatic	Mutational signature	DDR	Yes
P078	F	45	Hepatopancreaticobiliary	C22	8160	2017-04-07	35	CC	m2C	NA	3	Single-agent	CDKN2A	Loss-of-function	Somatic	Underexpression	CC	Yes
P078	F	45	Hepatopancreaticobiliary	C22	8160	2017-04-07	35	CC	m2C	NA	3	Single-agent	CDKN2A	Loss-of-function	Somatic	Deletion	CC	Yes
P078	F	45	Hepatopancreaticobiliary	C22	8160	2017-04-07	35	CC	m2C	NA	3	Single-agent	CDKN2B	Loss-of-function	Somatic	Deletion	CC	Yes
P078	F	45	Hepatopancreaticobiliary	C22	8160	2017-04-07	35	CC	m2C	NA	3	Single-agent	CDKN2B	Loss-of-function	Somatic	Underexpression	CC	Yes
P078	F	47	Hepatopancreaticobiliary	C22	8160	2018-05-15	103	TK	m1B	II-A	1	Single-agent	FGFR2	Gain-of-function	Somatic	Overexpression	TK	Yes
P078	F	47	Hepatopancreaticobiliary	C22	8160	2018-05-15	103	TK	m1B	II-A	1	Single-agent	FGFR2	Gain-of-function	Somatic	SNV/indel	TK	Yes
P078	F	47	Hepatopancreaticobiliary	C22	8160	2018-05-15	103	TK	m1B	II-A	1	Single-agent	FGFR2	Gain-of-function	Somatic	Fusion	TK	Yes
P078	F	47	Hepatopancreaticobiliary	C22	8160	2018-05-15	103	TK	m1B	II-A	1	Single-agent	WAC	Gain-of-function	Somatic	Overexpression	NA	Yes
P078	F	47	Hepatopancreaticobiliary	C22	8160	2018-05-15	103	TK	m1B	II-A	1	Single-agent	WAC	Gain-of-function	Somatic	Fusion	NA	Yes
P078	F	47	Hepatopancreaticobiliary	C22	8160	2018-05-15	103	IE	m2B	III-A	2	Single-agent	TMB	Composite biomarker	Somatic	Positive	IE	Yes
P079	M	56	Neuroendocrine and Adrenal	C25	8246	2018-04-14	78	IE,DEV	m2B	III-A	1	Combination	DLL3	Gain-of-function	Somatic	Overexpression	DEV	Yes
P079	M	56	Neuroendocrine and Adrenal	C25	8246	2018-04-14	78	TK	m2B	III-A	2	Single-agent	FGFR4	Gain-of-function	Somatic	Overexpression	TK	Yes
P079	M	56	Neuroendocrine and Adrenal	C25	8246	2018-04-14	78	TK	m2C	NA	3	Single-agent	FGFR4	Gain-of-function	Somatic	Overexpression	TK	Yes
P079	M	56	Neuroendocrine and Adrenal	C25	8246	2018-04-14	78	TK	m2C	NA	3	Single-agent	KLB	Gain-of-function	Somatic	Overexpression	TK	Yes
P079	M	56	Neuroendocrine and Adrenal	C25	8246	2018-04-14	78	TK	m2C	NA	3	Single-agent	RET	Gain-of-function	Somatic	Overexpression	TK	Yes
P079	M	56	Neuroendocrine and Adrenal	C25	8246	2018-04-14	78	OTH	m2C	NA	4	Single-agent	AR	Gain-of-function	Somatic	Overexpression	DEV	Yes
P079	M	56	Neuroendocrine and Adrenal	C25	8246	2018-04-14	78	OTH	m2C	NA	4	Single-agent	ESR1	Gain-of-function	Somatic	Overexpression	DEV	Yes
P080	F	45	Hepatopancreaticobiliary	C25	8500	2015-09-04	23	NA	NA	NA	NA	NA	NA	NA	NA	NA	NA	Yes
P081	M	66	Urologic	C61	8140	2015-10-02	100	DDR	m1B	II-B	1	Single-agent	BRCA2	Loss-of-function	Somatic	SNV/indel	DDR	Yes
P082	M	50	Upper Gastrointestinal	C16	8140	2016-03-18	84	TK	m2C	NA	1	Single-agent	FGFR2	Gain-of-function	Somatic	Overexpression	TK	Yes
P082	M	50	Upper Gastrointestinal	C16	8140	2016-03-18	84	TK	m2C	NA	1	Single-agent	FGFR2	Gain-of-function	Somatic	Gain	TK	Yes
P082	M	50	Upper Gastrointestinal	C16	8140	2016-03-18	84	CC	m4	X	2	Single-agent	CDKN2A	Loss-of-function	Somatic	Deletion	CC	Yes
P082	M	50	Upper Gastrointestinal	C16	8140	2016-03-18	84	CC	m4	X	2	Single-agent	CDKN2B	Loss-of-function	Somatic	Deletion	CC	Yes
P083	F	39	Leiomyosarcoma	C48	8890	2014-05-09	36	TK	m4	X	1	Single-agent	PTPRJ	Loss-of-function	Somatic	Deletion	TK	No
P083	F	39	Leiomyosarcoma	C48	8890	2014-05-09	36	DDR,OTH	m4	X	2	Combination	CDK12	Loss-of-function	Somatic	Deletion	DDR	No
P084	M	55	Neuroendocrine and Adrenal	C32	8249	2016-11-18	7992	IE	m2B	I-C	1	Single-agent	POLE	Loss-of-function	Somatic	SNV/indel	DDR	Yes
P084	M	55	Neuroendocrine and Adrenal	C32	8249	2016-11-18	7992	IE	m2B	I-C	1	Single-agent	TMB	Composite biomarker	NA	Positive	IE	Yes
P084	M	55	Neuroendocrine and Adrenal	C32	8249	2016-11-18	7992	RME	m3	IV-A	2	Single-agent	HRAS	Gain-of-function	Somatic	SNV/indel	RME	Yes
P084	M	55	Neuroendocrine and Adrenal	C32	8249	2016-11-18	7992	RME	m3	IV-A	2	Single-agent	NF1	Loss-of-function	Somatic	SNV/indel	RME	Yes
P084	M	55	Neuroendocrine and Adrenal	C32	8249	2016-11-18	7992	PAM	m3	IV-A	3	Single-agent	NF1	Loss-of-function	Somatic	SNV/indel	RME	Yes
P084	M	55	Neuroendocrine and Adrenal	C32	8249	2016-11-18	7992	DDR	m4	IV-B	4	Single-agent	BRCA1	Loss-of-function	Somatic	SNV/indel	DDR	Yes
P084	M	55	Neuroendocrine and Adrenal	C32	8249	2016-11-18	7992	DDR	m4	IV-B	4	Single-agent	BRCA2	Loss-of-function	Somatic	SNV/indel	DDR	Yes
P084	M	55	Neuroendocrine and Adrenal	C32	8249	2016-11-18	7992	DDR	m4	IV-B	4	Single-agent	CHEK2	Loss-of-function	Somatic	SNV/indel	DDR	Yes
P085	M	20	Ewing/PNET	C40	9260	2016-10-28	29	TK	m3	IV-A	1	Single-agent	FGFR1	Gain-of-function	Somatic	SNV/indel	TK	Yes
P085	M	20	Ewing/PNET	C40	9260	2016-10-28	29	TK	m3	IV-A	1	Single-agent	FGFR1	Gain-of-function	Somatic	Overexpression	TK	Yes
P085	M	20	Ewing/PNET	C40	9260	2016-10-28	29	CC	m3	IV-B	2	Single-agent	CCND1	Gain-of-function	Somatic	Overexpression	CC	Yes
P085	M	20	Ewing/PNET	C40	9260	2016-10-28	29	CC	m3	IV-B	2	Single-agent	CDK4	Gain-of-function	Somatic	Overexpression	CC	Yes
P085	M	20	Ewing/PNET	C40	9260	2016-10-28	29	CC	m3	IV-B	2	Single-agent	CDKN2A	Loss-of-function	Somatic	Underexpression	CC	Yes
P085	M	20	Ewing/PNET	C40	9260	2016-10-28	29	CC	m3	IV-B	2	Single-agent	CDKN2A	Loss-of-function	Somatic	Deletion	CC	Yes
P086	M	50	Soft Tissue Other	C49	8901	2017-09-22	54	TK	m2C	NA	1	Single-agent	FGFR1	Gain-of-function	Somatic	Gain	TK	Yes
P086	M	50	Soft Tissue Other	C49	8901	2017-09-22	54	TK	m2C	NA	1	Single-agent	FGFR1	Gain-of-function	Somatic	Overexpression	TK	Yes
P086	M	50	Soft Tissue Other	C49	8901	2017-09-22	54	TK	m2C	NA	1	Single-agent	FGFR3	Gain-of-function	Somatic	Overexpression	TK	Yes
P086	M	50	Soft Tissue Other	C49	8901	2017-09-22	54	TK	m2C	NA	1	Single-agent	PAX3	Gain-of-function	Somatic	Overexpression	DEV	Yes
P086	M	50	Soft Tissue Other	C49	8901	2017-09-22	54	TK	m2C	NA	1	Single-agent	PTPRJ	Loss-of-function	Somatic	Underexpression	TK	Yes
P086	M	50	Soft Tissue Other	C49	8901	2017-09-22	54	TK	m2C	NA	1	Single-agent	RET	Gain-of-function	Somatic	Overexpression	TK	Yes
P086	M	50	Soft Tissue Other	C49	8901	2017-09-22	54	OTH	m3	IV-A	2	Single-agent	MYCL	Gain-of-function	Somatic	Overexpression	CC	Yes
P086	M	50	Soft Tissue Other	C49	8901	2017-09-22	54	OTH	m3	IV-A	2	Single-agent	MYCL	Gain-of-function	Somatic	Gain	CC	Yes
P086	M	50	Soft Tissue Other	C49	8901	2017-09-22	54	OTH	m3	IV-A	2	Single-agent	MYCN	Gain-of-function	Somatic	Overexpression	OTH	Yes
P086	M	50	Soft Tissue Other	C49	8901	2017-09-22	54	OTH	m3	IV-A	2	Single-agent	PAX7	Gain-of-function	Somatic	Overexpression	OTH	Yes
P086	M	50	Soft Tissue Other	C49	8901	2017-09-22	54	PAM	m4	X	3	Single-agent	RHEB	Gain-of-function	Somatic	Overexpression	PAM	Yes
P086	M	50	Soft Tissue Other	C49	8901	2017-09-22	54	PAM	m4	X	3	Single-agent	RPTOR	Gain-of-function	Somatic	Overexpression	PAM	Yes
P087	M	52	Neuroendocrine and Adrenal	C34	8013	2015-05-15	25	TK	m4	X	1	Single-agent	RET	Gain-of-function	Somatic	Overexpression	TK	Yes
P088	F	23	Soft Tissue Other	C49	8810	2016-09-16	22	CC	m2C	NA	1	Single-agent	CDKN2A	Loss-of-function	Somatic	Deletion	CC	Yes
P088	F	23	Soft Tissue Other	C49	8810	2016-09-16	22	CC	m2C	NA	1	Single-agent	CDKN2A	Loss-of-function	Somatic	Underexpression	CC	Yes
P088	F	23	Soft Tissue Other	C49	8810	2016-09-16	22	CC	m2C	NA	1	Single-agent	CDKN2B	Loss-of-function	Somatic	Deletion	CC	Yes
P088	F	23	Soft Tissue Other	C49	8810	2016-09-16	22	CC	m2C	NA	1	Single-agent	CDKN2B	Loss-of-function	Somatic	Underexpression	CC	Yes
P088	F	23	Soft Tissue Other	C49	8810	2016-09-16	22	PAM	m4	X	2	Single-agent	AKT3	Gain-of-function	Somatic	Overexpression	PAM	Yes
P088	F	23	Soft Tissue Other	C49	8810	2016-09-16	22	PAM	m4	X	2	Single-agent	RICTOR	Gain-of-function	Somatic	Gain	PAM	Yes
P089	M	37	NSCLC	C34	8140	2013-08-02	43	NA	NA	NA	NA	NA	NA	NA	NA	NA	NA	No
P090	F	52	Upper Gastrointestinal	C16	8144	2015-06-19	107	PAM	m4	X	1	Single-agent	PIK3R5	Gain-of-function	Somatic	SNV/indel	PAM	Yes
P090	F	52	Upper Gastrointestinal	C16	8144	2015-06-19	107	IE	m2B	III-A	2	Single-agent	TMB	Composite biomarker	NA	Positive	IE	Yes
P091	M	67	Urologic	C67	8130	2018-01-16	58	CC	m2A	III-A	1	Single-agent	CDK4	Gain-of-function	Somatic	Gain	CC	No
P091	M	67	Urologic	C67	8130	2018-01-16	58	CC	m2A	III-A	1	Single-agent	CDKN2A	Loss-of-function	Somatic	Deletion	CC	No
P091	M	67	Urologic	C67	8130	2018-01-16	58	CC	m2A	III-A	1	Single-agent	CDKN2B	Loss-of-function	Somatic	Deletion	CC	No
P091	M	67	Urologic	C67	8130	2018-01-16	58	TK	m2B	III-B	2	Single-agent	FGF4	Gain-of-function	Somatic	Gain	TK	No
P091	M	67	Urologic	C67	8130	2018-01-16	58	OTH	m3	IV-A	3	Single-agent	KDM6A	Loss-of-function	Somatic	SNV/indel	OTH	No
P091	M	67	Urologic	C67	8130	2018-01-16	58	CC,CC	m2C	NA	4	Combination	MDM2	Gain-of-function	Somatic	Gain	CC	No
P092	M	48	Bone	C40	9220	2017-09-08	106	OTH	m2C	NA	1	Single-agent	IDH1	Gain-of-function	Somatic	SNV/indel	OTH	Yes
P092	M	48	Bone	C40	9220	2017-09-08	106	DDR	m3	IV-A	3	Single-agent	IDH1	Gain-of-function	Somatic	SNV/indel	OTH	Yes
P092	M	48	Bone	C40	9220	2017-09-08	106	IE	m2B	I-C	1	Single-agent	TMB	Composite biomarker	NA	Positive	IE	Yes
P092	M	48	Bone	C40	9220	2017-09-08	106	TK	m3	IV-A	2	Single-agent	FGFR3	Gain-of-function	Somatic	Overexpression	TK	Yes
P093	M	33	Soft Tissue Other	C47	9540	2016-06-03	25	OTH,OTH	m3	IV-A	1	Combination	SMARCA4	Loss-of-function	Somatic	SNV/indel	DEV	Yes
P093	M	33	Soft Tissue Other	C47	9540	2016-06-03	25	OTH,OTH	m3	IV-A	1	Combination	SMARCB1	Loss-of-function	Somatic	SNV/indel	DEV	Yes
P093	M	33	Soft Tissue Other	C47	9540	2016-06-03	25	OTH,OTH	m3	IV-A	1	Combination	SMARCB1	Loss-of-function	Somatic	Deletion	DEV	Yes
P093	M	33	Soft Tissue Other	C47	9540	2016-06-03	25	OTH	m3	IV-A	1	Single-agent	SMARCB1	Loss-of-function	Somatic	SNV/indel	DEV	Yes
P093	M	33	Soft Tissue Other	C47	9540	2016-06-03	25	OTH	m3	IV-A	1	Single-agent	SMARCB1	Loss-of-function	Somatic	Deletion	DEV	Yes
P093	M	33	Soft Tissue Other	C47	9540	2016-06-03	25	OTH	m3	IV-A	1	Single-agent	SMARCB1	Loss-of-function	Somatic	SNV/indel	DEV	Yes
P093	M	33	Soft Tissue Other	C47	9540	2016-06-03	25	OTH	m3	IV-A	1	Single-agent	SMARCB1	Loss-of-function	Somatic	Deletion	DEV	Yes
P093	M	33	Soft Tissue Other	C47	9540	2016-06-03	25	OTH	m3	IV-A	1	Single-agent	SMARCB1	Loss-of-function	Somatic	SNV/indel	DEV	Yes
P093	M	33	Soft Tissue Other	C47	9540	2016-06-03	25	OTH	m3	IV-A	1	Single-agent	SMARCB1	Loss-of-function	Somatic	Deletion	DEV	Yes
P094	F	33	Neuroendocrine and Adrenal	C74	8370	2017-05-05	82	CC	m2C	NA	1	Single-agent	CDKN2A	Loss-of-function	Somatic	Deletion	CC	Yes
P094	F	33	Neuroendocrine and Adrenal	C74	8370	2017-05-05	82	CC	m2C	NA	1	Single-agent	CDKN2A	Loss-of-function	Somatic	Underexpression	CC	Yes
P094	F	33	Neuroendocrine and Adrenal	C74	8370	2017-05-05	82	CC	m2C	NA	1	Single-agent	CDKN2B	Loss-of-function	Somatic	Deletion	CC	Yes
P094	F	33	Neuroendocrine and Adrenal	C74	8370	2017-05-05	82	CC	m2C	NA	1	Single-agent	CDKN2B	Loss-of-function	Somatic	Underexpression	CC	Yes
P094	F	33	Neuroendocrine and Adrenal	C74	8370	2017-05-05	82	DDR	m3	IV-A	2	Single-agent	ATM	Loss-of-function	Germline	SNV/indel	DDR	Yes
P094	F	33	Neuroendocrine and Adrenal	C74	8370	2017-05-05	82	DDR	m3	IV-A	2	Single-agent	MSH3	Loss-of-function	Somatic	SNV/indel	NA	Yes
P095	M	36	Soft Tissue Other	C49	9133	2018-02-09	10	TK	m2C	NA	1	Single-agent	FLT4	Gain-of-function	Somatic	Overexpression	TK	Yes
P095	M	36	Soft Tissue Other	C49	9133	2018-02-09	10	TK	m2C	NA	1	Single-agent	KDR	Gain-of-function	Somatic	Overexpression	TK	Yes
P095	M	36	Soft Tissue Other	C49	9133	2018-02-09	10	TK	m2C	NA	1	Single-agent	PDGFB	Gain-of-function	Somatic	Overexpression	TK	Yes
P095	M	36	Soft Tissue Other	C49	9133	2018-02-09	10	TK	m2C	NA	1	Single-agent	TEK	Gain-of-function	Somatic	Overexpression	TK	Yes
P095	M	36	Soft Tissue Other	C49	9133	2018-02-09	10	PAM,OTH	m4	X	2	Combination	TPT1	Gain-of-function	Somatic	SNV/indel	NA	Yes
P095	M	36	Soft Tissue Other	C49	9133	2018-02-09	10	PAM,OTH	m4	X	2	Combination	TPT1	Gain-of-function	Somatic	Overexpression	NA	Yes
P096	M	52	Upper Gastrointestinal	C17	8480	2018-02-16	147	IE,RME	m2B	III-A	1	Combination	KRAS	Gain-of-function	Somatic	SNV/indel	RME	No
P096	M	52	Upper Gastrointestinal	C17	8480	2018-02-16	147	IE,RME	m2B	III-A	1	Combination	TMB	Composite biomarker	NA	Positive	IE	No
P096	M	52	Upper Gastrointestinal	C17	8480	2018-02-16	147	RME,TK	m4	X	2	Combination	ERBB3	Gain-of-function	Somatic	SNV/indel	TK	No
P096	M	52	Upper Gastrointestinal	C17	8480	2018-02-16	147	RME,TK	m4	X	2	Combination	NRG1	Gain-of-function	Somatic	SNV/indel	TK	No
P096	M	52	Upper Gastrointestinal	C17	8480	2018-02-16	147	IE,RME	m3	IV-A	3	Combination	KRAS	Gain-of-function	Somatic	SNV/indel	RME	No
P096	M	52	Upper Gastrointestinal	C17	8480	2018-02-16	147	RME	m3	IV-A	4	Single-agent	KRAS	Gain-of-function	Somatic	SNV/indel	RME	No
P097	F	34	Ewing/PNET	C49	9260	2017-12-12	70	DDR	m3	IV-A	1	Single-agent	EWSR1	Gain-of-function	Somatic	Fusion	OTH	Yes
P097	F	34	Ewing/PNET	C49	9260	2017-12-12	70	DDR	m3	IV-A	1	Single-agent	FLI1	Gain-of-function	Somatic	Fusion	OTH	Yes
P097	F	34	Ewing/PNET	C49	9260	2017-12-12	70	DDR	m3	IV-A	1	Single-agent	SBS3	Composite biomarker	Somatic	Mutational signature	DDR	Yes
P097	F	34	Ewing/PNET	C49	9260	2017-12-12	70	DDR	m3	IV-A	1	Single-agent	SLFN11	Gain-of-function	Somatic	Overexpression	DDR	Yes
P097	F	34	Ewing/PNET	C49	9260	2017-12-12	70	DDR	m3	IV-A	1	Single-agent	SLFN11	Gain-of-function	Somatic	SNV/indel	DDR	Yes
P097	F	34	Ewing/PNET	C49	9260	2017-12-12	70	OTH	m3	IV-A	2	Single-agent	EZH2	Gain-of-function	Somatic	Overexpression	OTH	Yes
P097	F	34	Ewing/PNET	C49	9260	2017-12-12	70	TK	m3	IV-A	3	Single-agent	ALK	Gain-of-function	Somatic	Overexpression	TK	Yes
P097	F	34	Ewing/PNET	C49	9260	2017-12-12	70	TK	m3	IV-A	3	Single-agent	NTRK1	Gain-of-function	Somatic	Overexpression	TK	Yes
P098	F	45	Leiomyosarcoma	C48	8890	2017-03-31	66	DDR	m2B	III-A	1	Single-agent	ATM	Loss-of-function	Somatic	Deletion	DDR	Yes
P098	F	45	Leiomyosarcoma	C48	8890	2017-03-31	66	DDR	m2B	III-A	1	Single-agent	BRCA2	Loss-of-function	Somatic	Deletion	DDR	Yes
P098	F	45	Leiomyosarcoma	C48	8890	2017-03-31	66	DDR	m2B	III-A	1	Single-agent	MRE11	Loss-of-function	Somatic	Deletion	DDR	Yes
P098	F	45	Leiomyosarcoma	C48	8890	2017-03-31	66	DDR	m2B	III-A	1	Single-agent	RAD51	Loss-of-function	Somatic	Deletion	DDR	Yes
P098	F	45	Leiomyosarcoma	C48	8890	2017-03-31	66	DDR	m2B	III-A	1	Single-agent	SBS3	Composite biomarker	Somatic	Mutational signature	DDR	Yes
P098	F	45	Leiomyosarcoma	C48	8890	2017-03-31	66	RME	m3	IV-A	2	Single-agent	NF1	Loss-of-function	Somatic	SNV/indel	RME	Yes
P098	F	45	Leiomyosarcoma	C48	8890	2017-03-31	66	RME	m3	IV-A	2	Single-agent	NF1	Loss-of-function	Somatic	Underexpression	RME	Yes
P099	F	28	Neuroendocrine and Adrenal	C74	8370	2016-09-02	62	PAM	m4	X	1	Single-agent	AKT1	Gain-of-function	Somatic	Overexpression	PAM	Yes
P099	F	28	Neuroendocrine and Adrenal	C74	8370	2016-09-02	62	PAM	m4	X	1	Single-agent	AKT2	Gain-of-function	Somatic	Overexpression	PAM	Yes
P099	F	28	Neuroendocrine and Adrenal	C74	8370	2016-09-02	62	PAM	m4	X	1	Single-agent	PIK3R2	Gain-of-function	Somatic	Gain	PAM	Yes
P100	F	39	Head and Neck	C33	8200	2018-03-09	6	OTH	m3	IV-A	1	Single-agent	MYB	Gain-of-function	Somatic	Fusion	OTH	No
P100	F	39	Head and Neck	C33	8200	2018-03-09	6	OTH	m3	IV-A	1	Single-agent	NFIB	Gain-of-function	Somatic	Fusion	OTH	No
P101	M	53	Neuroendocrine and Adrenal	C38	8246	2018-10-19	73	TK	m2B	III-A	1	Single-agent	FGF3	Gain-of-function	Somatic	Overexpression	TK	Yes
P101	M	53	Neuroendocrine and Adrenal	C38	8246	2018-10-19	73	TK	m2B	III-A	1	Single-agent	FGF4	Gain-of-function	Somatic	Overexpression	TK	Yes
P101	M	53	Neuroendocrine and Adrenal	C38	8246	2018-10-19	73	TK	m2B	III-A	1	Single-agent	FGFR1	Gain-of-function	Somatic	Overexpression	TK	Yes
P101	M	53	Neuroendocrine and Adrenal	C38	8246	2018-10-19	73	DEV	m4	X	2	Single-agent	KIF7	Gain-of-function	Somatic	Overexpression	DEV	Yes
P101	M	53	Neuroendocrine and Adrenal	C38	8246	2018-10-19	73	DEV	m4	X	2	Single-agent	SHH	Gain-of-function	Somatic	Overexpression	DEV	Yes
P102	F	41	Hepatopancreaticobiliary	C25	8500	2017-03-03	32	TK,TK	m4	X	1	Combination	CDH6	Gain-of-function	Somatic	Fusion	NA	Yes
P102	F	41	Hepatopancreaticobiliary	C25	8500	2017-03-03	32	TK,TK	m4	X	1	Combination	NRG1	Gain-of-function	Somatic	Fusion	TK	Yes
P102	F	41	Hepatopancreaticobiliary	C25	8500	2017-03-03	32	TK,TK	m4	X	1	Combination	SARAF	Gain-of-function	Somatic	Fusion	NA	Yes
P102	F	42	Hepatopancreaticobiliary	C25	8500	2018-06-29	20	RME	m3	IV-A	2	Single-agent	NRAS	Gain-of-function	Somatic	Gain	RME	Yes
P103	F	25	Hematopoietic	C91	9818	2017-08-04	63	TK	m3	IV-A	1	Single-agent	E2A	Gain-of-function	Somatic	Fusion	NA	Yes
P103	F	25	Hematopoietic	C91	9818	2017-08-04	63	TK	m3	IV-A	1	Single-agent	PBX1	Gain-of-function	Somatic	Fusion	NA	Yes
P103	F	25	Hematopoietic	C91	9818	2017-08-04	63	CC	m3	IV-A	2	Single-agent	CDK6	Gain-of-function	Somatic	Overexpression	CC	Yes
P103	F	25	Hematopoietic	C91	9818	2017-08-04	63	CC	m3	IV-A	2	Single-agent	CDKN2A	Loss-of-function	Somatic	Deletion	CC	Yes
P103	F	25	Hematopoietic	C91	9818	2017-08-04	63	CC	m3	IV-A	2	Single-agent	CDKN2B	Loss-of-function	Somatic	Deletion	CC	Yes
P103	F	25	Hematopoietic	C91	9818	2017-08-04	63	CC	m3	IV-A	2	Single-agent	E2A	Gain-of-function	Somatic	Fusion	NA	Yes
P103	F	25	Hematopoietic	C91	9818	2017-08-04	63	CC	m3	IV-A	2	Single-agent	PBX1	Gain-of-function	Somatic	Fusion	NA	Yes
P104	F	61	Gynecologic	C56	8472	2016-09-23	38	PAM	m3	IV-A	1	Single-agent	TSC2	Loss-of-function	Somatic	Deletion	PAM	No
P104	F	61	Gynecologic	C56	8472	2016-09-23	38	CC	m4	X	2	Single-agent	PLK1	Gain-of-function	Somatic	SNV/indel	CC	No
P105	F	74	Neuroendocrine and Adrenal	C80	8249	2018-07-18	33	TK	m3	IV-A	1	Single-agent	ARID1A	Loss-of-function	Somatic	SNV/indel	OTH	Yes
P105	F	74	Neuroendocrine and Adrenal	C80	8249	2018-07-18	33	TK	m3	IV-A	1	Single-agent	FLT4	Gain-of-function	Somatic	Overexpression	TK	Yes
P105	F	74	Neuroendocrine and Adrenal	C80	8249	2018-07-18	33	TK	m3	IV-A	1	Single-agent	PDGFB	Gain-of-function	Somatic	Overexpression	TK	Yes
P105	F	74	Neuroendocrine and Adrenal	C80	8249	2018-07-18	33	TK	m3	IV-A	1	Single-agent	RET	Gain-of-function	Somatic	Overexpression	TK	Yes
P105	F	74	Neuroendocrine and Adrenal	C80	8249	2018-07-18	33	DEV	m2C	NA	2	Single-agent	DLL3	Gain-of-function	Somatic	Overexpression	DEV	Yes
P105	F	74	Neuroendocrine and Adrenal	C80	8249	2018-07-18	33	OTH	m3	IV-A	3	Single-agent	ASCL1	Gain-of-function	Somatic	Overexpression	OTH	Yes
P105	F	74	Neuroendocrine and Adrenal	C80	8249	2018-07-18	33	OTH	m3	IV-A	3	Single-agent	MYCL	Gain-of-function	Somatic	Overexpression	CC	Yes
P106	M	26	Soft Tissue Other	C76	8806	2017-09-22	10	TK	m2B	III-B	1	Single-agent	NRG1	Gain-of-function	Somatic	Overexpression	TK	Yes
P106	M	26	Soft Tissue Other	C76	8806	2017-09-22	10	RME	m2C	NA	2	Single-agent	KDR	Gain-of-function	Somatic	Overexpression	TK	Yes
P106	M	26	Soft Tissue Other	C76	8806	2017-09-22	10	RME	m2C	NA	2	Single-agent	RAF1	Gain-of-function	Somatic	Overexpression	RME	Yes
P107	F	45	Leiomyosarcoma	C54	8890	2017-02-10	19	DDR,OTH	m2B	III-B	1	Combination	BRCA1	Loss-of-function	Somatic	Deletion	DDR	Yes
P107	F	45	Leiomyosarcoma	C54	8890	2017-02-10	19	DDR,OTH	m2B	III-B	1	Combination	BRCA2	Loss-of-function	Somatic	Deletion	DDR	Yes
P107	F	45	Leiomyosarcoma	C54	8890	2017-02-10	19	DDR,OTH	m2B	III-B	1	Combination	BRIP1	Loss-of-function	Somatic	Deletion	DDR	Yes
P107	F	45	Leiomyosarcoma	C54	8890	2017-02-10	19	DDR,OTH	m2B	III-B	1	Combination	CDK12	Loss-of-function	Somatic	Deletion	DDR	Yes
P107	F	45	Leiomyosarcoma	C54	8890	2017-02-10	19	DDR,OTH	m2B	III-B	1	Combination	ERCC5	Loss-of-function	Somatic	Deletion	DDR	Yes
P107	F	45	Leiomyosarcoma	C54	8890	2017-02-10	19	DDR,OTH	m2B	III-B	1	Combination	FANCI	Loss-of-function	Somatic	Deletion	DDR	Yes
P107	F	45	Leiomyosarcoma	C54	8890	2017-02-10	19	DDR,OTH	m2B	III-B	1	Combination	FANCL	Loss-of-function	Somatic	Deletion	DDR	Yes
P107	F	45	Leiomyosarcoma	C54	8890	2017-02-10	19	DDR,OTH	m2B	III-B	1	Combination	HDAC2	Loss-of-function	Somatic	Deletion	DDR	Yes
P107	F	45	Leiomyosarcoma	C54	8890	2017-02-10	19	DDR,OTH	m2B	III-B	1	Combination	MLH3	Loss-of-function	Somatic	Deletion	DDR	Yes
P107	F	45	Leiomyosarcoma	C54	8890	2017-02-10	19	DDR,OTH	m2B	III-B	1	Combination	RAD51	Loss-of-function	Somatic	Deletion	DDR	Yes
P107	F	45	Leiomyosarcoma	C54	8890	2017-02-10	19	DDR,OTH	m2B	III-B	1	Combination	RAD51B	Loss-of-function	Somatic	Deletion	DDR	Yes
P107	F	45	Leiomyosarcoma	C54	8890	2017-02-10	19	DDR,OTH	m2B	III-B	1	Combination	RAD51C	Loss-of-function	Somatic	Deletion	DDR	Yes
P107	F	45	Leiomyosarcoma	C54	8890	2017-02-10	19	DDR,OTH	m2B	III-B	1	Combination	RAD51D	Loss-of-function	Somatic	Deletion	DDR	Yes
P107	F	45	Leiomyosarcoma	C54	8890	2017-04-07	39	DDR,OTH	m2B	III-B	1	Combination	BRCA2	Loss-of-function	Somatic	Deletion	DDR	Yes
P107	F	45	Leiomyosarcoma	C54	8890	2017-04-07	39	DDR,OTH	m2B	III-B	1	Combination	PALB2	Loss-of-function	Somatic	Deletion	DDR	Yes
P107	F	45	Leiomyosarcoma	C54	8890	2017-04-07	39	DDR,OTH	m2B	III-B	1	Combination	SBS3	Composite biomarker	Somatic	Mutational signature	DDR	Yes
P107	F	45	Leiomyosarcoma	C54	8890	2017-04-07	39	OTH	m4	X	2	Single-agent	FOXL2	Gain-of-function	Somatic	Overexpression	DEV	Yes
P108	F	65	Leiomyosarcoma	C55	8890	2018-02-09	74	DDR,OTH	m2C	NA	1	Combination	ATM	Loss-of-function	Germline	Deletion	DDR	No
P108	F	65	Leiomyosarcoma	C55	8890	2018-02-09	74	DDR,OTH	m2C	NA	1	Combination	ATM	Loss-of-function	Germline	SNV/indel	DDR	No
P108	F	65	Leiomyosarcoma	C55	8890	2018-02-09	74	DDR,OTH	m2C	NA	1	Combination	HRD	Composite biomarker	Germline	Positive	DDR	No
P108	F	65	Leiomyosarcoma	C55	8890	2018-02-09	74	DDR,OTH	m2C	NA	1	Combination	HRD	Composite biomarker	Somatic	Positive	DDR	No
P108	F	65	Leiomyosarcoma	C55	8890	2018-02-09	74	DDR,OTH	m2C	NA	1	Combination	PTEN	Loss-of-function	Somatic	Deletion	PAM	No
P108	F	65	Leiomyosarcoma	C55	8890	2018-02-09	74	DDR,OTH	m2C	NA	1	Combination	SBS3	Composite biomarker	Germline	Mutational signature	DDR	No
P108	F	65	Leiomyosarcoma	C55	8890	2018-02-09	74	DDR,OTH	m2C	NA	1	Combination	SBS3	Composite biomarker	Somatic	Mutational signature	DDR	No
P108	F	65	Leiomyosarcoma	C55	8890	2018-02-09	74	PAM	m2B	III-A	2	Single-agent	PTEN	Loss-of-function	Somatic	Deletion	PAM	No
P108	F	65	Leiomyosarcoma	C55	8890	2018-02-09	74	NA	NA	NA	NA	NA	ATM	Loss-of-function	Germline	NA	DDR	No
P109	F	44	Breast	C50	8500	2015-01-09	65	PAM	m2C	III-B	1	Single-agent	PIK3CA	Gain-of-function	Somatic	SNV/indel	PAM	Yes
P110	F	44	Unknown Primary	C79	8140	2018-03-13	34	OTH	m2C	NA	1	Single-agent	IDH1	Gain-of-function	Somatic	SNV/indel	OTH	Yes
P110	F	44	Unknown Primary	C79	8140	2018-03-13	34	DDR	m2B	III-B	2	Single-agent	ATR	Loss-of-function	Somatic	Deletion	DDR	Yes
P110	F	44	Unknown Primary	C79	8140	2018-03-13	34	DDR	m2B	III-B	2	Single-agent	BRCA2	Loss-of-function	Somatic	Deletion	DDR	Yes
P110	F	44	Unknown Primary	C79	8140	2018-03-13	34	DDR	m2B	III-B	2	Single-agent	ERCC5	Loss-of-function	Somatic	Deletion	DDR	Yes
P110	F	44	Unknown Primary	C79	8140	2018-03-13	34	DDR	m2B	III-B	2	Single-agent	FANCB	Loss-of-function	Somatic	Deletion	DDR	Yes
P110	F	44	Unknown Primary	C79	8140	2018-03-13	34	DDR	m2B	III-B	2	Single-agent	FANCC	Loss-of-function	Somatic	Deletion	DDR	Yes
P110	F	44	Unknown Primary	C79	8140	2018-03-13	34	DDR	m2B	III-B	2	Single-agent	FANCD2	Loss-of-function	Somatic	Deletion	DDR	Yes
P110	F	44	Unknown Primary	C79	8140	2018-03-13	34	DDR	m2B	III-B	2	Single-agent	HDAC2	Loss-of-function	Somatic	Deletion	DDR	Yes
P110	F	44	Unknown Primary	C79	8140	2018-03-13	34	DDR	m2B	III-B	2	Single-agent	IDH1	Gain-of-function	Somatic	SNV/indel	OTH	Yes
P110	F	44	Unknown Primary	C79	8140	2018-03-13	34	DDR	m2B	III-B	2	Single-agent	RAD51B	Loss-of-function	Somatic	Deletion	DDR	Yes
P110	F	44	Unknown Primary	C79	8140	2018-03-13	34	DDR	m2B	III-B	2	Single-agent	SBS3	Composite biomarker	Somatic	Mutational signature	DDR	Yes
P111	F	54	Hematopoietic	C90	9732	2016-09-30	40	TK	m3	IV-A	1	Single-agent	JAK2	Gain-of-function	Germline	SNV/indel	TK	No
P112	M	45	Other	C79	8072	2017-07-14	78	DEV	m2B	III-B	1	Single-agent	PTCH1	Loss-of-function	Somatic	SNV/indel	DEV	Yes
P112	M	45	Other	C79	8072	2017-07-14	78	path	NA	NA	NA	NA	NA	NA	NA	NA	NA	Yes
P113	F	74	Unknown Primary	C79	8140	2014-08-15	2	NA	NA	NA	NA	NA	NA	NA	NA	NA	NA	No
P114	F	44	NSCLC	C34	8140	2015-05-15	57	PAM	m2B	III-A	1	Single-agent	PIK3CA	Gain-of-function	Somatic	SNV/indel	PAM	Yes
P114	F	44	NSCLC	C34	8140	2015-05-15	57	TK	m3	IV-A	2	Single-agent	ERBB2	Gain-of-function	Somatic	Gain	TK	Yes
P114	F	44	NSCLC	C34	8140	2015-05-15	57	TK	m3	IV-A	2	Single-agent	ERBB3	Gain-of-function	Somatic	SNV/indel	TK	Yes
P114	F	44	NSCLC	C34	8140	2015-05-15	57	TK	m3	IV-A	2	Single-agent	ERBB4	Gain-of-function	Somatic	Overexpression	TK	Yes
P115	F	48	Colorectal	C20	8140	2017-12-19	108	IE,RME	m2C	NA	1	Combination	KRAS	Gain-of-function	Somatic	SNV/indel	RME	Yes
P115	F	48	Colorectal	C20	8140	2017-12-19	108	IE,RME	m2C	NA	1	Combination	TMB	Composite biomarker	NA	Positive	IE	Yes
P115	F	48	Colorectal	C20	8140	2017-12-19	108	OTH	m2B	III-B	1	Single-agent	CD274	Gain-of-function	Somatic	Underexpression	IE	Yes
P115	F	48	Colorectal	C20	8140	2017-12-19	108	RME,TK	m3	IV-A	2	Combination	ERBB2	Gain-of-function	Somatic	SNV/indel	TK	Yes
P115	F	48	Colorectal	C20	8140	2017-12-19	108	RME,TK	m3	IV-A	2	Combination	ERBB2	Gain-of-function	Somatic	Overexpression	TK	Yes
P115	F	48	Colorectal	C20	8140	2017-12-19	108	RME,TK	m3	IV-A	2	Combination	KRAS	Gain-of-function	Somatic	SNV/indel	RME	Yes
P115	F	48	Colorectal	C20	8140	2017-12-19	108	RME,TK	m3	IV-A	2	Combination	TMB	Composite biomarker	NA	Positive	IE	Yes
P115	F	48	Colorectal	C20	8140	2017-12-19	108	RME	m3	IV-A	3	Single-agent	KRAS	Gain-of-function	Somatic	SNV/indel	RME	Yes
P116	M	35	Soft Tissue Other	C96	8802	2017-04-21	119	IE	m2B	III-B	1	Single-agent	TMB	Composite biomarker	Somatic	Positive	IE	Yes
P116	M	35	Soft Tissue Other	C96	8802	2017-04-21	119	DDR	m3	IV-A	2	Single-agent	BAP1	Loss-of-function	Somatic	SNV/indel	DDR	Yes
P116	M	35	Soft Tissue Other	C96	8802	2017-04-21	119	RME	m4	X	3	Single-agent	GNAS	Gain-of-function	Somatic	SNV/indel	RME	Yes
P117	M	61	Hematopoietic	C83	9680	2018-10-19	223	NA	NA	NA	NA	NA	NA	NA	NA	NA	NA	No
P118	F	20	Soft Tissue Other	C48	8900	2018-04-03	29	DDR,OTH	m2B	III-B	1	Combination	ATP7A	Loss-of-function	Somatic	Fusion	NA	Yes
P118	F	20	Soft Tissue Other	C48	8900	2018-04-03	29	DDR,OTH	m2B	III-B	1	Combination	ATRX	Loss-of-function	Somatic	Fusion	OTH	Yes
P118	F	20	Soft Tissue Other	C48	8900	2018-04-03	29	DDR,OTH	m2B	III-B	1	Combination	FANCF	Loss-of-function	Somatic	Underexpression	DDR	Yes
P118	F	20	Soft Tissue Other	C48	8900	2018-04-03	29	DDR,OTH	m2B	III-B	1	Combination	HRD	Composite biomarker	Somatic	Positive	DDR	Yes
P118	F	20	Soft Tissue Other	C48	8900	2018-04-03	29	DDR,OTH	m2B	III-B	1	Combination	SBS3	Composite biomarker	Somatic	Mutational signature	DDR	Yes
P118	F	20	Soft Tissue Other	C48	8900	2018-04-03	29	DDR,OTH	m2B	III-B	1	Combination	SBS8	Composite biomarker	Somatic	Mutational signature	DDR	Yes
P118	F	20	Soft Tissue Other	C48	8900	2018-04-03	29	DDR	m2B	III-B	2	Single-agent	ATP7A	Loss-of-function	Somatic	Fusion	NA	Yes
P118	F	20	Soft Tissue Other	C48	8900	2018-04-03	29	DDR	m2B	III-B	2	Single-agent	ATRX	Loss-of-function	Somatic	Fusion	OTH	Yes
P118	F	20	Soft Tissue Other	C48	8900	2018-04-03	29	DDR	m2B	III-B	2	Single-agent	FANCF	Loss-of-function	Somatic	Underexpression	DDR	Yes
P118	F	20	Soft Tissue Other	C48	8900	2018-04-03	29	DDR	m2B	III-B	2	Single-agent	HRD	Composite biomarker	Somatic	Positive	DDR	Yes
P118	F	20	Soft Tissue Other	C48	8900	2018-04-03	29	DDR	m2B	III-B	2	Single-agent	SBS3	Composite biomarker	Somatic	Mutational signature	DDR	Yes
P118	F	20	Soft Tissue Other	C48	8900	2018-04-03	29	DDR	m2B	III-B	2	Single-agent	SBS8	Composite biomarker	Somatic	Mutational signature	DDR	Yes
P118	F	20	Soft Tissue Other	C48	8900	2018-04-03	29	OTH	m4	X	3	Single-agent	SSX1	Loss-of-function	Somatic	Overexpression	OTH	Yes
P118	F	20	Soft Tissue Other	C48	8900	2018-04-03	29	OTH	m4	X	3	Single-agent	SSX1	Loss-of-function	Somatic	Gain	OTH	Yes
P118	F	20	Soft Tissue Other	C48	8900	2018-04-03	29	TK	m2C	X	4	Single-agent	FGFR1	Gain-of-function	Somatic	Gain	TK	Yes
P118	F	20	Soft Tissue Other	C48	8900	2018-04-03	29	TK	m2C	X	4	Single-agent	FGFR1	Gain-of-function	Somatic	Overexpression	TK	Yes
P118	F	20	Soft Tissue Other	C48	8900	2018-04-03	29	TK	m2C	X	4	Single-agent	IGF1R	Gain-of-function	Somatic	Gain	TK	Yes
P118	F	20	Soft Tissue Other	C48	8900	2018-04-03	29	TK	m2C	X	4	Single-agent	IGF1R	Gain-of-function	Somatic	Overexpression	TK	Yes
P118	F	20	Soft Tissue Other	C48	8900	2018-04-03	29	TK	m2C	X	4	Single-agent	MERTK	Gain-of-function	Somatic	Overexpression	TK	Yes
P118	F	20	Soft Tissue Other	C48	8900	2018-04-03	29	TK	m4	X	5	Single-agent	JAK1	Gain-of-function	Somatic	Gain	TK	Yes
P118	F	20	Soft Tissue Other	C48	8900	2018-04-03	29	TK	m4	X	5	Single-agent	JAK1	Gain-of-function	Somatic	Overexpression	TK	Yes
P118	F	20	Soft Tissue Other	C48	8900	2018-04-03	29	TK	m4	X	5	Single-agent	OSM	Gain-of-function	Somatic	Overexpression	OTH	Yes
P118	F	20	Soft Tissue Other	C48	8900	2018-04-03	29	TK	m4	X	5	Single-agent	OSM	Gain-of-function	Somatic	Gain	OTH	Yes
P118	F	20	Soft Tissue Other	C48	8900	2018-04-03	29	TK	m4	X	5	Single-agent	OSMR	Gain-of-function	Somatic	Overexpression	TK	Yes
P118	F	20	Soft Tissue Other	C48	8900	2018-04-03	29	TK	m4	X	5	Single-agent	OSMR	Gain-of-function	Somatic	Gain	TK	Yes
P118	F	20	Soft Tissue Other	C48	8900	2018-04-03	29	NA	NA	NA	NA	NA	TP53	Loss-of-function	Germline	NA	CC	Yes
P119	M	42	Hepatopancreaticobiliary	C22	8160	2018-03-09	35	TK	m1B	II-B	1	Single-agent	FGFR2	Gain-of-function	Somatic	Overexpression	TK	Yes
P119	M	42	Hepatopancreaticobiliary	C22	8160	2018-03-09	35	TK	m1B	II-B	1	Single-agent	FGFR2	Gain-of-function	Somatic	Fusion	TK	Yes
P119	M	42	Hepatopancreaticobiliary	C22	8160	2018-03-09	35	TK	m1B	II-B	1	Single-agent	FGFR4	Gain-of-function	Somatic	Overexpression	TK	Yes
P119	M	42	Hepatopancreaticobiliary	C22	8160	2018-03-09	35	TK	m1B	II-B	1	Single-agent	SH3GLB1	Gain-of-function	Somatic	Overexpression	NA	Yes
P119	M	42	Hepatopancreaticobiliary	C22	8160	2018-03-09	35	TK	m1B	II-B	1	Single-agent	SH3GLB1	Gain-of-function	Somatic	Fusion	NA	Yes
P119	M	42	Hepatopancreaticobiliary	C22	8160	2018-03-09	35	PAM	m2C	NA	2	Single-agent	TSC1	Loss-of-function	Somatic	SNV/indel	PAM	Yes
P120	F	30	Gynecologic	C56	8441	2018-08-03	17	NA	NA	NA	NA	NA	NA	NA	NA	NA	NA	No
P121	F	31	Soft Tissue Other	C49	8821	2018-04-20	16	DDR,OTH	m2A	III-A	1	Combination	BAP1	Loss-of-function	Somatic	SNV/indel	DDR	Yes
P121	F	31	Soft Tissue Other	C49	8821	2018-04-20	16	DDR,OTH	m2A	III-A	1	Combination	BRCA2	Loss-of-function	Germline	SNV/indel	DDR	Yes
P121	F	31	Soft Tissue Other	C49	8821	2018-04-20	16	DEV	m3	IV-A	2	Single-agent	CTNNB1	Gain-of-function	Somatic	SNV/indel	DEV	Yes
P121	F	31	Soft Tissue Other	C49	8821	2018-04-20	16	NA	NA	NA	NA	NA	ERCC2	Loss-of-function	Germline	NA	DDR	Yes
P121	F	31	Soft Tissue Other	C49	8821	2018-04-20	16	NA	NA	NA	NA	NA	BRCA2	Loss-of-function	Germline	NA	DDR	Yes
P122	M	63	Soft Tissue Other	C96	9757	2018-06-08	9	RME	m2B	III-B	1	Single-agent	KRAS	Gain-of-function	Somatic	SNV/indel	RME	No
P122	M	63	Soft Tissue Other	C96	9757	2018-06-08	9	RME	m2B	III-B	1	Single-agent	RHOG	Gain-of-function	Somatic	SNV/indel	NA	No
P122	M	63	Soft Tissue Other	C96	9757	2018-06-08	9	RME	m2B	III-B	1	Single-agent	SRGAP1	Loss-of-function	Somatic	SNV/indel	NA	No
P122	M	63	Soft Tissue Other	C96	9757	2018-06-08	9	RME	m2B	III-B	1	Single-agent	KRAS	Gain-of-function	Somatic	SNV/indel	RME	No
P122	M	63	Soft Tissue Other	C96	9757	2018-06-08	9	RME	m2B	III-B	1	Single-agent	KRAS	Gain-of-function	Somatic	SNV/indel	RME	No
P122	M	63	Soft Tissue Other	C96	9757	2018-06-08	9	RME	m2B	III-B	1	Single-agent	RHOG	Gain-of-function	Somatic	SNV/indel	NA	No
P122	M	63	Soft Tissue Other	C96	9757	2018-06-08	9	RME	m2B	III-B	1	Single-agent	SRGAP1	Loss-of-function	Somatic	SNV/indel	NA	No
P123	F	30	Ewing/PNET	C49	9260	2018-04-20	49	DDR,OTH	m2C	NA	1	Combination	EWSR1	Gain-of-function	Somatic	Fusion	OTH	Yes
P123	F	30	Ewing/PNET	C49	9260	2018-04-20	49	DDR,OTH	m2C	NA	1	Combination	FANCC	Loss-of-function	Germline	SNV/indel	DDR	Yes
P123	F	30	Ewing/PNET	C49	9260	2018-04-20	49	DDR,OTH	m2C	NA	1	Combination	FANCC	Loss-of-function	Germline	Deletion	DDR	Yes
P123	F	30	Ewing/PNET	C49	9260	2018-04-20	49	DDR,OTH	m2C	NA	1	Combination	FLI1	Gain-of-function	Somatic	Fusion	OTH	Yes
P123	F	30	Ewing/PNET	C49	9260	2018-04-20	49	DDR,OTH	m2C	NA	1	Combination	HRD	Composite biomarker	Germline	Negative	DDR	Yes
P123	F	30	Ewing/PNET	C49	9260	2018-04-20	49	DDR,OTH	m2C	NA	1	Combination	SBS3	Composite biomarker	Germline	Mutational signature	DDR	Yes
P123	F	30	Ewing/PNET	C49	9260	2018-04-20	49	DDR,OTH	m2C	NA	1	Combination	SBS3	Composite biomarker	Somatic	Mutational signature	DDR	Yes
P123	F	30	Ewing/PNET	C49	9260	2018-04-20	49	DDR,OTH	m2C	NA	1	Combination	SLFN11	Gain-of-function	Somatic	Overexpression	DDR	Yes
P123	F	30	Ewing/PNET	C49	9260	2018-04-20	49	DDR,OTH	m2C	NA	2	Combination	EWSR1	Gain-of-function	Somatic	Fusion	OTH	Yes
P123	F	30	Ewing/PNET	C49	9260	2018-04-20	49	DDR,OTH	m2C	NA	2	Combination	FANCC	Loss-of-function	Germline	SNV/indel	DDR	Yes
P123	F	30	Ewing/PNET	C49	9260	2018-04-20	49	DDR,OTH	m2C	NA	2	Combination	FANCC	Loss-of-function	Germline	Deletion	DDR	Yes
P123	F	30	Ewing/PNET	C49	9260	2018-04-20	49	DDR,OTH	m2C	NA	2	Combination	FLI1	Gain-of-function	Somatic	Fusion	OTH	Yes
P123	F	30	Ewing/PNET	C49	9260	2018-04-20	49	DDR,OTH	m2C	NA	2	Combination	HRD	Composite biomarker	Germline	Negative	DDR	Yes
P123	F	30	Ewing/PNET	C49	9260	2018-04-20	49	DDR,OTH	m2C	NA	2	Combination	SBS3	Composite biomarker	Germline	Mutational signature	DDR	Yes
P123	F	30	Ewing/PNET	C49	9260	2018-04-20	49	DDR,OTH	m2C	NA	2	Combination	SBS3	Composite biomarker	Somatic	Mutational signature	DDR	Yes
P123	F	30	Ewing/PNET	C49	9260	2018-04-20	49	DDR,OTH	m2C	NA	2	Combination	SLFN11	Gain-of-function	Somatic	Overexpression	DDR	Yes
P123	F	30	Ewing/PNET	C49	9260	2018-04-20	49	IE,DDR	m2C	NA	3	Combination	EWSR1	Gain-of-function	Somatic	Fusion	OTH	Yes
P123	F	30	Ewing/PNET	C49	9260	2018-04-20	49	IE,DDR	m2C	NA	3	Combination	FANCC	Loss-of-function	Germline	SNV/indel	DDR	Yes
P123	F	30	Ewing/PNET	C49	9260	2018-04-20	49	IE,DDR	m2C	NA	3	Combination	FANCC	Loss-of-function	Germline	Deletion	DDR	Yes
P123	F	30	Ewing/PNET	C49	9260	2018-04-20	49	IE,DDR	m2C	NA	3	Combination	FLI1	Gain-of-function	Somatic	Fusion	OTH	Yes
P123	F	30	Ewing/PNET	C49	9260	2018-04-20	49	IE,DDR	m2C	NA	3	Combination	HRD	Composite biomarker	Germline	Negative	DDR	Yes
P123	F	30	Ewing/PNET	C49	9260	2018-04-20	49	IE,DDR	m2C	NA	3	Combination	PDCD1	Gain-of-function	Somatic	Overexpression	IE	Yes
P123	F	30	Ewing/PNET	C49	9260	2018-04-20	49	IE,DDR	m2C	NA	3	Combination	SBS3	Composite biomarker	Germline	Mutational signature	DDR	Yes
P123	F	30	Ewing/PNET	C49	9260	2018-04-20	49	IE,DDR	m2C	NA	3	Combination	SBS3	Composite biomarker	Somatic	Mutational signature	DDR	Yes
P123	F	30	Ewing/PNET	C49	9260	2018-04-20	49	IE,DDR	m2C	NA	3	Combination	SLFN11	Gain-of-function	Somatic	Overexpression	DDR	Yes
P123	F	30	Ewing/PNET	C49	9260	2018-04-20	49	OTH	m3	IV-A	4	Single-agent	EZH2	Gain-of-function	Somatic	Overexpression	OTH	Yes
P123	F	30	Ewing/PNET	C49	9260	2018-04-20	49	OTH	m3	IV-A	4	Single-agent	EZH2	Gain-of-function	Somatic	Overexpression	OTH	Yes
P123	F	30	Ewing/PNET	C49	9260	2018-04-20	49	TK	m3	IV-A	5	Single-agent	ALK	Gain-of-function	Somatic	Overexpression	TK	Yes
P123	F	30	Ewing/PNET	C49	9260	2018-04-20	49	CC	m2B	III-B	6	Single-agent	CCND1	Gain-of-function	Somatic	Overexpression	CC	Yes
P123	F	30	Ewing/PNET	C49	9260	2018-04-20	49	CC	m2B	III-B	6	Single-agent	CCND2	Gain-of-function	Somatic	Overexpression	CC	Yes
P123	F	30	Ewing/PNET	C49	9260	2018-04-20	49	CC	m2B	III-B	6	Single-agent	CCND3	Gain-of-function	Somatic	Overexpression	CC	Yes
P123	F	30	Ewing/PNET	C49	9260	2018-04-20	49	NA	NA	NA	NA	NA	FANCC	Loss-of-function	Germline	NA	DDR	Yes
P124	F	31	Bone	C40	9183	2017-05-12	92	DDR	m3	IV-A	1	Single-agent	BRCA2	Loss-of-function	Somatic	Underexpression	DDR	Yes
P124	F	31	Bone	C40	9183	2017-05-12	92	DDR	m3	IV-A	1	Single-agent	BRCA2	Loss-of-function	Somatic	Deletion	DDR	Yes
P124	F	31	Bone	C40	9183	2017-05-12	92	DDR	m3	IV-A	1	Single-agent	ERCC4	Loss-of-function	Somatic	Deletion	DDR	Yes
P124	F	31	Bone	C40	9183	2017-05-12	92	DDR	m3	IV-A	1	Single-agent	ERCC4	Loss-of-function	Somatic	Underexpression	DDR	Yes
P124	F	31	Bone	C40	9183	2017-05-12	92	DDR	m3	IV-A	1	Single-agent	FANCF	Loss-of-function	Somatic	Deletion	DDR	Yes
P124	F	31	Bone	C40	9183	2017-05-12	92	DDR	m3	IV-A	1	Single-agent	FANCF	Loss-of-function	Somatic	Underexpression	DDR	Yes
P124	F	31	Bone	C40	9183	2017-05-12	92	DDR	m3	IV-A	1	Single-agent	SBS3	Composite biomarker	Somatic	Mutational signature	DDR	Yes
P124	F	31	Bone	C40	9183	2017-05-12	92	TK	m3	IV-A	2	Single-agent	FGFR2	Gain-of-function	Somatic	Gain	TK	Yes
P124	F	31	Bone	C40	9183	2017-05-12	92	TK	m3	IV-A	2	Single-agent	FGFR2	Gain-of-function	Somatic	Overexpression	TK	Yes
P124	F	31	Bone	C40	9183	2017-05-12	92	TK	m3	IV-A	2	Single-agent	FGFR3	Gain-of-function	Somatic	Overexpression	TK	Yes
P124	F	31	Bone	C40	9183	2017-05-12	92	TK	m3	IV-A	2	Single-agent	FGFR4	Gain-of-function	Somatic	Overexpression	TK	Yes
P124	F	31	Bone	C40	9183	2017-05-12	92	IE	m2C	NA	3	Single-agent	CTAG1B	Gain-of-function	Somatic	Overexpression	IE	Yes
P125	F	31	Breast	C50	8540	2017-08-04	29	CC	m1C	NA	1	Single-agent	CDKN2A	Loss-of-function	Somatic	Deletion	CC	No
P125	F	31	Breast	C50	8540	2017-08-04	29	DDR	m2B	III-B	2	Single-agent	ATM	Loss-of-function	Somatic	Deletion	DDR	No
P125	F	31	Breast	C50	8540	2017-08-04	29	DDR	m2B	III-B	2	Single-agent	BRCA1	Loss-of-function	Somatic	Deletion	DDR	No
P125	F	31	Breast	C50	8540	2017-08-04	29	DDR	m2B	III-B	2	Single-agent	BRCA2	Loss-of-function	Somatic	Deletion	DDR	No
P125	F	31	Breast	C50	8540	2017-08-04	29	DDR	m2B	III-B	2	Single-agent	CHEK1	Loss-of-function	Somatic	Deletion	DDR	No
P125	F	31	Breast	C50	8540	2017-08-04	29	DDR	m2B	III-B	2	Single-agent	FANCB	Loss-of-function	Somatic	Deletion	DDR	No
P125	F	31	Breast	C50	8540	2017-08-04	29	DDR	m2B	III-B	2	Single-agent	MRE11	Loss-of-function	Somatic	Deletion	DDR	No
P125	F	31	Breast	C50	8540	2017-08-04	29	DDR	m2B	III-B	2	Single-agent	SBS3	Composite biomarker	Somatic	Mutational signature	DDR	No
P125	F	31	Breast	C50	8540	2017-08-04	29	TK	m1B	II-A	3	Single-agent	FGF3	Gain-of-function	Somatic	Gain	TK	No
P125	F	31	Breast	C50	8540	2017-08-04	29	TK	m1B	II-A	3	Single-agent	FGF4	Gain-of-function	Somatic	Gain	TK	No
P126	M	32	Soft Tissue Other	C49	8815	2018-04-27	32	TK	m2B	III-B	1	Single-agent	FGFR1	Gain-of-function	Somatic	Overexpression	TK	Yes
P126	M	32	Soft Tissue Other	C49	8815	2018-04-27	32	TK	m2B	III-B	1	Single-agent	NAB2	NA	Somatic	Fusion	OTH	Yes
P126	M	32	Soft Tissue Other	C49	8815	2018-04-27	32	TK	m2B	III-B	1	Single-agent	NTRK1	Gain-of-function	Somatic	Overexpression	TK	Yes
P126	M	32	Soft Tissue Other	C49	8815	2018-04-27	32	TK	m2B	III-B	1	Single-agent	NTRK3	Gain-of-function	Somatic	Overexpression	TK	Yes
P126	M	32	Soft Tissue Other	C49	8815	2018-04-27	32	TK	m2B	III-B	1	Single-agent	STAT6	Gain-of-function	Somatic	Fusion	OTH	Yes
P126	M	32	Soft Tissue Other	C49	8815	2018-04-27	32	IE	m2C	NA	2	Single-agent	LAG3	Gain-of-function	Somatic	Overexpression	IE	Yes
P126	M	32	Soft Tissue Other	C49	8815	2018-04-27	32	NA	NA	NA	NA	NA	RAD51D	Loss-of-function	Germline	NA	DDR	Yes
P127	M	31	Soft Tissue Other	C49	8804	2016-11-11	34	OTH	m3	IV-A	1	Single-agent	SMARCB1	Loss-of-function	Somatic	SNV/indel	DEV	Yes
P127	M	31	Soft Tissue Other	C49	8804	2016-11-11	34	OTH	m3	IV-A	1	Single-agent	SMARCB1	Loss-of-function	Somatic	Deletion	DEV	Yes
P127	M	31	Soft Tissue Other	C49	8804	2016-11-11	34	RME,TK	m3	IV-A	2	Combination	ERBB3	Gain-of-function	Somatic	Overexpression	TK	Yes
P127	M	31	Soft Tissue Other	C49	8804	2016-11-11	34	RME,TK	m3	IV-A	2	Combination	MAP2K2	Gain-of-function	Somatic	Overexpression	RME	Yes
P127	M	31	Soft Tissue Other	C49	8804	2016-11-11	34	RME,TK	m3	IV-A	2	Combination	NF2	Loss-of-function	Somatic	Deletion	PAM	Yes
P127	M	31	Soft Tissue Other	C49	8804	2016-11-11	34	RME,TK	m3	IV-A	2	Combination	NRG1	Gain-of-function	Somatic	Overexpression	TK	Yes
P127	M	31	Soft Tissue Other	C49	8804	2016-11-11	34	path	NA	NA	NA	NA	NA	NA	NA	NA	NA	Yes
P128	F	44	Hepatopancreaticobiliary	C79	8140	2016-09-23	32	TK	m2C	NA	1	Single-agent	FGFR2	Gain-of-function	Somatic	Overexpression	TK	Yes
P128	F	44	Hepatopancreaticobiliary	C79	8140	2016-09-23	32	TK	m2C	NA	1	Single-agent	FGFR2	Gain-of-function	Somatic	Fusion	TK	Yes
P128	F	44	Hepatopancreaticobiliary	C79	8140	2016-09-23	32	TK	m2C	NA	1	Single-agent	FGFR3	Gain-of-function	Somatic	Overexpression	TK	Yes
P128	F	44	Hepatopancreaticobiliary	C79	8140	2016-09-23	32	TK	m2C	NA	1	Single-agent	FGFR4	Gain-of-function	Somatic	Overexpression	TK	Yes
P128	F	44	Hepatopancreaticobiliary	C79	8140	2016-09-23	32	TK	m2C	NA	1	Single-agent	WAC	Gain-of-function	Somatic	Fusion	NA	Yes
P128	F	44	Hepatopancreaticobiliary	C79	8140	2016-09-23	32	TK	m2C	NA	1	Single-agent	WAC	Gain-of-function	Somatic	Overexpression	NA	Yes
P128	F	44	Hepatopancreaticobiliary	C79	8140	2016-09-23	32	CC	m2C	NA	2	Single-agent	CDKN2A	Loss-of-function	Somatic	Deletion	CC	Yes
P128	F	44	Hepatopancreaticobiliary	C79	8140	2016-09-23	32	CC	m2C	NA	2	Single-agent	CDKN2B	Loss-of-function	Somatic	Deletion	CC	Yes
P128	F	44	Hepatopancreaticobiliary	C79	8140	2016-09-23	32	DDR	m3	IV-A	3	Single-agent	FANCG	Loss-of-function	Somatic	Deletion	DDR	Yes
P128	F	44	Hepatopancreaticobiliary	C79	8140	2016-09-23	32	DDR	m3	IV-A	3	Single-agent	RAD51B	Loss-of-function	Somatic	Deletion	DDR	Yes
P128	F	44	Hepatopancreaticobiliary	C79	8140	2016-09-23	32	DDR	m3	IV-A	3	Single-agent	XRCC3	Loss-of-function	Somatic	Deletion	DDR	Yes
P128	F	44	Hepatopancreaticobiliary	C79	8140	2016-09-23	32	path	NA	NA	NA	NA	NA	NA	NA	NA	NA	Yes
P129	M	42	Hematopoietic	C83	9729	2015-12-04	16	NA	NA	NA	NA	NA	NA	NA	NA	NA	NA	Yes
P129	M	42	Hematopoietic	C83	9729	2016-07-08	16	DEV	m2C	NA	1	Single-agent	NOTCH1	Gain-of-function	Somatic	Fusion	DEV	Yes
P129	M	42	Hematopoietic	C83	9729	2016-07-08	16	DEV	m2C	NA	1	Single-agent	NOTCH1	Gain-of-function	Somatic	Overexpression	DEV	Yes
P129	M	42	Hematopoietic	C83	9729	2016-07-08	16	DEV	m2C	NA	1	Single-agent	TRBJ2-2	Gain-of-function	Somatic	Overexpression	NA	Yes
P129	M	42	Hematopoietic	C83	9729	2016-07-08	16	DEV	m2C	NA	1	Single-agent	TRBJ2-2	Gain-of-function	Somatic	Fusion	NA	Yes
P129	M	42	Hematopoietic	C83	9729	2016-07-08	16	PAM,RME	m3	IV-A	2	Combination	NOTCH1	Gain-of-function	Somatic	Overexpression	DEV	Yes
P129	M	42	Hematopoietic	C83	9729	2016-07-08	16	PAM,RME	m3	IV-A	2	Combination	NOTCH1	Gain-of-function	Somatic	Fusion	DEV	Yes
P129	M	42	Hematopoietic	C83	9729	2016-07-08	16	PAM,RME	m3	IV-A	2	Combination	TRBJ2-2	Gain-of-function	Somatic	Overexpression	NA	Yes
P129	M	42	Hematopoietic	C83	9729	2016-07-08	16	PAM,RME	m3	IV-A	2	Combination	TRBJ2-2	Gain-of-function	Somatic	Fusion	NA	Yes
P129	M	43	Hematopoietic	C83	9729	2017-05-26	96	NA	NA	NA	NA	NA	NA	NA	NA	NA	NA	Yes
P130	F	30	Hepatopancreaticobiliary	C25	8500	2017-01-20	28	TK	m3	IV-A	1	Single-agent	ATP1B1	Gain-of-function	Somatic	Fusion	NA	Yes
P130	F	30	Hepatopancreaticobiliary	C25	8500	2017-01-20	28	TK	m3	IV-A	1	Single-agent	NRG1	Gain-of-function	Somatic	Fusion	TK	Yes
P130	F	30	Hepatopancreaticobiliary	C25	8500	2017-01-20	28	TK	m3	IV-A	1	Single-agent	NRG1	Gain-of-function	Somatic	Overexpression	TK	Yes
P130	F	30	Hepatopancreaticobiliary	C25	8500	2017-01-20	28	TK	m4	X	2	Single-agent	FGFR2	Gain-of-function	Somatic	Overexpression	TK	Yes
P130	F	30	Hepatopancreaticobiliary	C25	8500	2017-01-20	28	TK	m4	X	2	Single-agent	FGFR3	Gain-of-function	Somatic	Overexpression	TK	Yes
P130	F	30	Hepatopancreaticobiliary	C25	8500	2017-01-20	28	TK	m4	X	2	Single-agent	FGFR4	Gain-of-function	Somatic	Overexpression	TK	Yes
P131	M	45	Liposarcoma	C49	8855	2016-05-06	31	RME	m4	X	1	Single-agent	GNAI2	Gain-of-function	Somatic	SNV/indel	NA	No
P131	M	47	Liposarcoma	C49	8855	2018-10-05	61	DDR	m2B	III-A	1	Single-agent	FANCC	Loss-of-function	Somatic	Deletion	DDR	No
P131	M	47	Liposarcoma	C49	8855	2018-10-05	61	DDR	m2B	III-A	1	Single-agent	PTEN	Loss-of-function	Somatic	Deletion	PAM	No
P131	M	47	Liposarcoma	C49	8855	2018-10-05	61	PAM	m2B	III-A	2	Single-agent	PTEN	Loss-of-function	Somatic	Deletion	PAM	No
P131	M	47	Liposarcoma	C49	8855	2018-10-05	61	DEV	m2B	III-A	3	Single-agent	PTCH1	Loss-of-function	Somatic	Deletion	DEV	No
P132	F	43	Breast	C50	8500	2016-12-09	119	OTH	m1B	II-A	1	Single-agent	ESR1	Gain-of-function	Somatic	SNV/indel	DEV	Yes
P132	F	43	Breast	C50	8500	2016-12-09	119	IE	m2B	III-A	2	Single-agent	TMB	Composite biomarker	Somatic	Positive	IE	Yes
P132	F	43	Breast	C50	8500	2016-12-09	119	DDR	m3	IV-A	3	Single-agent	ATM	Loss-of-function	Somatic	Deletion	DDR	Yes
P132	F	43	Breast	C50	8500	2016-12-09	119	DDR	m3	IV-A	3	Single-agent	BRCA1	Loss-of-function	Somatic	Deletion	DDR	Yes
P132	F	43	Breast	C50	8500	2016-12-09	119	DDR	m3	IV-A	3	Single-agent	CHEK2	Loss-of-function	Germline	SNV/indel	DDR	Yes
P132	F	43	Breast	C50	8500	2016-12-09	119	DDR	m3	IV-A	3	Single-agent	MRE11	Loss-of-function	Somatic	Deletion	DDR	Yes
P132	F	43	Breast	C50	8500	2016-12-09	119	NA	NA	NA	NA	NA	CHEK2	Loss-of-function	Germline	NA	DDR	Yes
P133	F	44	Colorectal	C18	8140	2018-09-07	184	NA	NA	NA	NA	NA	NA	NA	NA	NA	NA	Yes
P134	M	67	Other	C70	9538	2016-12-23	34	PAM	m3	IV-A	1	Single-agent	NF2	Loss-of-function	Somatic	SNV/indel	PAM	Yes
P134	M	67	Other	C70	9538	2016-12-23	34	PAM	m3	IV-A	1	Single-agent	NF2	Loss-of-function	Somatic	Underexpression	PAM	Yes
P134	M	67	Other	C70	9538	2016-12-23	34	PAM	m3	IV-A	1	Single-agent	VHL	Loss-of-function	Somatic	SNV/indel	PAM	Yes
P134	M	67	Other	C70	9538	2016-12-23	34	RME	m3	IV-A	2	Single-agent	NF2	Loss-of-function	Somatic	SNV/indel	PAM	Yes
P134	M	67	Other	C70	9538	2016-12-23	34	RME	m3	IV-A	2	Single-agent	NF2	Loss-of-function	Somatic	Underexpression	PAM	Yes
P134	M	67	Other	C70	9538	2016-12-23	34	CC	m3	IV-A	3	Single-agent	SETD2	Loss-of-function	Somatic	SNV/indel	OTH	Yes
P134	M	67	Other	C70	9538	2016-12-23	34	DDR	m4	X	4	Single-agent	SETD2	Loss-of-function	Somatic	SNV/indel	OTH	Yes
P135	F	46	Melanoma	C43	8720	2017-12-15	106	IE,RME	m2B	III-A	1	Combination	BRAF	Gain-of-function	Somatic	Overexpression	RME	Yes
P135	F	46	Melanoma	C43	8720	2017-12-15	106	IE,RME	m2B	III-A	1	Combination	BRAF	Gain-of-function	Somatic	SNV/indel	RME	Yes
P135	F	46	Melanoma	C43	8720	2017-12-15	106	IE,RME	m2B	III-A	1	Combination	NRAS	Gain-of-function	Somatic	SNV/indel	RME	Yes
P135	F	46	Melanoma	C43	8720	2017-12-15	106	IE,RME	m2B	III-A	1	Combination	TMB	Composite biomarker	Somatic	Positive	IE	Yes
P135	F	46	Melanoma	C43	8720	2017-12-15	106	IE,IE	m1C	NA	2	Combination	MAGEA3	Gain-of-function	Somatic	Overexpression	IE	Yes
P135	F	46	Melanoma	C43	8720	2017-12-15	106	IE,IE	m1C	NA	2	Combination	TPTE	Gain-of-function	Somatic	Overexpression	IE	Yes
P135	F	46	Melanoma	C43	8720	2017-12-15	106	IE,IE	m1C	NA	2	Combination	TYR	Gain-of-function	Somatic	Overexpression	IE	Yes
P135	F	46	Melanoma	C43	8720	2017-12-15	106	IE,DEV	m2B	III-B	3	Combination	DLL3	Gain-of-function	Somatic	Overexpression	DEV	Yes
P136	F	49	Melanoma	C43	8744	2017-03-17	68	TK	m3	IV-A	1	Single-agent	ERBB3	Gain-of-function	Somatic	Overexpression	TK	Yes
P136	F	49	Melanoma	C43	8744	2017-03-17	68	TK	m3	IV-A	1	Single-agent	NRG2	Gain-of-function	Somatic	Overexpression	TK	Yes
P136	F	49	Melanoma	C43	8744	2017-03-17	68	TK	m4	X	2	Single-agent	PTPRJ	Loss-of-function	Somatic	SNV/indel	TK	Yes
P137	F	46	Leiomyosarcoma	C55	8890	2018-09-21	49	DDR,OTH	m2B	III-A	1	Combination	BRCA2	Loss-of-function	Somatic	Deletion	DDR	No
P137	F	46	Leiomyosarcoma	C55	8890	2018-09-21	49	DDR,OTH	m2B	III-A	1	Combination	HRD	Composite biomarker	Somatic	Positive	DDR	No
P137	F	46	Leiomyosarcoma	C55	8890	2018-09-21	49	DDR,OTH	m2B	III-A	1	Combination	PTEN	Loss-of-function	Somatic	Deletion	PAM	No
P137	F	46	Leiomyosarcoma	C55	8890	2018-09-21	49	DDR,OTH	m2B	III-A	1	Combination	SBS3	Composite biomarker	Somatic	Mutational signature	DDR	No
P137	F	46	Leiomyosarcoma	C55	8890	2018-09-21	49	PAM	m2B	III-A	2	Single-agent	PTEN	Loss-of-function	Somatic	Deletion	PAM	No
P137	F	46	Leiomyosarcoma	C55	8890	2018-09-21	49	TK	m3	IV-A	3	Single-agent	PTPN12	Loss-of-function	Somatic	Deletion	TK	No
P137	F	46	Leiomyosarcoma	C55	8890	2018-09-21	49	TK	m3	IV-A	3	Single-agent	PTPN12	Loss-of-function	Somatic	SNV/indel	TK	No
P138	M	46	Melanoma	C43	8720	2016-07-29	224	IE	m1B	II-A	1	Single-agent	CD274	Gain-of-function	Somatic	Overexpression	IE	Yes
P138	M	46	Melanoma	C43	8720	2016-07-29	224	IE	m1B	II-A	1	Single-agent	CTLA4	Gain-of-function	Somatic	Overexpression	IE	Yes
P138	M	46	Melanoma	C43	8720	2016-07-29	224	IE	m1B	II-A	1	Single-agent	PDCD1	Gain-of-function	Somatic	Overexpression	IE	Yes
P138	M	46	Melanoma	C43	8720	2016-07-29	224	IE	m1B	II-A	1	Single-agent	PDCD1LG2	Gain-of-function	Somatic	Overexpression	IE	Yes
P138	M	46	Melanoma	C43	8720	2016-07-29	224	IE	m1B	II-A	1	Single-agent	TMB	Composite biomarker	Somatic	Positive	IE	Yes
P138	M	46	Melanoma	C43	8720	2016-07-29	224	CC	m4	X	2	Single-agent	CDKN2A	Loss-of-function	Somatic	SNV/indel	CC	Yes
P139	F	31	Unknown Primary	C79	8500	2018-07-03	29	RME,TK	m2B	III-A	1	Combination	EGFR	Gain-of-function	Somatic	Overexpression	TK	Yes
P139	F	31	Unknown Primary	C79	8500	2018-07-03	29	RME,TK	m2B	III-A	1	Combination	ERBB3	Gain-of-function	Somatic	Overexpression	TK	Yes
P139	F	31	Unknown Primary	C79	8500	2018-07-03	29	RME,TK	m2B	III-A	1	Combination	KRAS	Gain-of-function	Somatic	SNV/indel	RME	Yes
P139	F	31	Unknown Primary	C79	8500	2018-07-03	29	RME,TK	m2B	III-A	1	Combination	NRG1	Gain-of-function	Somatic	Overexpression	TK	Yes
P139	F	31	Unknown Primary	C79	8500	2018-07-03	29	RME,CC	m2C	NA	2	Combination	CDKN2A	Loss-of-function	Somatic	Deletion	CC	Yes
P139	F	31	Unknown Primary	C79	8500	2018-07-03	29	RME,CC	m2C	NA	2	Combination	CDKN2B	Loss-of-function	Somatic	Deletion	CC	Yes
P139	F	31	Unknown Primary	C79	8500	2018-07-03	29	RME,CC	m2C	NA	2	Combination	KRAS	Gain-of-function	Somatic	SNV/indel	RME	Yes
P139	F	31	Unknown Primary	C79	8500	2018-07-03	29	RME,CC	m2C	NA	2	Combination	KRAS	Gain-of-function	Somatic	Deletion	RME	Yes
P139	F	31	Unknown Primary	C79	8500	2018-07-03	29	DDR	m3	IV-A	3	Single-agent	BRCA1	Loss-of-function	Somatic	Deletion	DDR	Yes
P139	F	31	Unknown Primary	C79	8500	2018-07-03	29	DDR	m3	IV-A	3	Single-agent	CHEK2	Loss-of-function	Germline	SNV/indel	DDR	Yes
P139	F	31	Unknown Primary	C79	8500	2018-07-03	29	DDR	m3	IV-A	3	Single-agent	HRD	Composite biomarker	Germline	Positive	DDR	Yes
P139	F	31	Unknown Primary	C79	8500	2018-07-03	29	DDR	m3	IV-A	3	Single-agent	HRD	Composite biomarker	Somatic	Positive	DDR	Yes
P139	F	31	Unknown Primary	C79	8500	2018-07-03	29	DDR	m3	IV-A	3	Single-agent	RAD51	Loss-of-function	Somatic	Deletion	DDR	Yes
P139	F	31	Unknown Primary	C79	8500	2018-07-03	29	DDR	m3	IV-A	3	Single-agent	RAD51C	Loss-of-function	Somatic	Deletion	DDR	Yes
P139	F	31	Unknown Primary	C79	8500	2018-07-03	29	TK	m3	IV-A	4	Single-agent	DDR1	Gain-of-function	Somatic	Overexpression	TK	Yes
P139	F	31	Unknown Primary	C79	8500	2018-07-03	29	TK	m3	IV-A	4	Single-agent	EPHA3	Gain-of-function	Somatic	Overexpression	TK	Yes
P139	F	31	Unknown Primary	C79	8500	2018-07-03	29	TK	m3	IV-A	4	Single-agent	EPHA3	Gain-of-function	Somatic	Gain	TK	Yes
P139	F	31	Unknown Primary	C79	8500	2018-07-03	29	NA	NA	NA	NA	NA	CHEK2	Loss-of-function	Germline	NA	DDR	Yes
P140	F	42	Breast	C50	8500	2016-11-11	39	PAM	m2B	II-A	1	Single-agent	PTEN	Loss-of-function	Somatic	SNV/indel	PAM	No
P140	F	42	Breast	C50	8500	2016-11-11	39	DDR	m3	III-B	2	Single-agent	BRCA1	Loss-of-function	Somatic	Deletion	DDR	No
P140	F	42	Breast	C50	8500	2016-11-11	39	DDR	m3	III-B	2	Single-agent	RAD51	Loss-of-function	Somatic	Deletion	DDR	No
P140	F	42	Breast	C50	8500	2016-11-11	39	DDR	m3	III-B	2	Single-agent	SBS3	Composite biomarker	Somatic	Mutational signature	DDR	No
P141	F	65	Liposarcoma	C49	8858	2018-09-05	167	CC,CC	m1A	II-B	1	Combination	CCND2	Gain-of-function	Somatic	Gain	CC	No
P141	F	65	Liposarcoma	C49	8858	2018-09-05	167	CC,CC	m1A	II-B	1	Combination	CDK4	Gain-of-function	Somatic	Gain	CC	No
P141	F	65	Liposarcoma	C49	8858	2018-09-05	167	CC,CC	m1A	II-B	1	Combination	CDKN2A	Loss-of-function	Somatic	Deletion	CC	No
P141	F	65	Liposarcoma	C49	8858	2018-09-05	167	CC,CC	m1A	II-B	1	Combination	CDKN2B	Loss-of-function	Somatic	Deletion	CC	No
P141	F	65	Liposarcoma	C49	8858	2018-09-05	167	CC,CC	m1A	II-B	1	Combination	MDM2	Gain-of-function	Somatic	Gain	CC	No
P141	F	65	Liposarcoma	C49	8858	2018-09-05	167	IE,CC	m1A	II-B	1	Combination	CCND2	Gain-of-function	Somatic	Gain	CC	No
P141	F	65	Liposarcoma	C49	8858	2018-09-05	167	IE,CC	m1A	II-B	1	Combination	CDK4	Gain-of-function	Somatic	Gain	CC	No
P141	F	65	Liposarcoma	C49	8858	2018-09-05	167	IE,CC	m1A	II-B	1	Combination	TMB	Composite biomarker	Somatic	Positive	IE	No
P141	F	65	Liposarcoma	C49	8858	2018-09-05	167	IE,DDR	m2B	III-A	2	Combination	HRD	Composite biomarker	Somatic	Positive	DDR	No
P141	F	65	Liposarcoma	C49	8858	2018-09-05	167	IE,DDR	m2B	III-A	2	Combination	SBS3	Composite biomarker	Somatic	Mutational signature	DDR	No
P141	F	65	Liposarcoma	C49	8858	2018-09-05	167	IE,DDR	m2B	III-A	2	Combination	SBS8	Composite biomarker	Somatic	Mutational signature	DDR	No
P141	F	65	Liposarcoma	C49	8858	2018-09-05	167	IE,DDR	m2B	III-A	2	Combination	TMB	Composite biomarker	Somatic	Positive	IE	No
P141	F	65	Liposarcoma	C49	8858	2018-09-05	167	IE,OTH	m2B	III-A	3	Combination	TMB	Composite biomarker	Somatic	Positive	IE	No
P142	F	36	Soft Tissue Other	C49	8802	2016-07-29	427	IE	m2B	III-A	1	Single-agent	MSH2	Loss-of-function	Germline	SNV/indel	DDR	Yes
P142	F	36	Soft Tissue Other	C49	8802	2016-07-29	427	IE	m2B	III-A	1	Single-agent	MSH2	Loss-of-function	Germline	Underexpression	DDR	Yes
P142	F	36	Soft Tissue Other	C49	8802	2016-07-29	427	IE	m2B	III-A	1	Single-agent	MSI	Composite biomarker	Somatic	MSI	NA	Yes
P142	F	36	Soft Tissue Other	C49	8802	2016-07-29	427	IE	m2B	III-A	1	Single-agent	SBS26	Composite biomarker	Somatic	Mutational signature	NA	Yes
P142	F	36	Soft Tissue Other	C49	8802	2016-07-29	427	IE	m2B	III-A	1	Single-agent	SBS6	Composite biomarker	Somatic	Mutational signature	NA	Yes
P142	F	36	Soft Tissue Other	C49	8802	2016-07-29	427	NA	NA	NA	NA	NA	MEN1	Loss-of-function	Germline	NA	OTH	Yes
P142	F	36	Soft Tissue Other	C49	8802	2016-07-29	427	NA	NA	NA	NA	NA	MSH2	Loss-of-function	Germline	NA	DDR	Yes
P143	F	46	GIST	C17	8936	2015-04-24	24	TK	m2A	III-B	1	Single-agent	RET	Gain-of-function	Somatic	Fusion	TK	Yes
P143	F	46	GIST	C17	8936	2015-04-24	24	TK	m2A	III-B	1	Single-agent	TRIM33	Gain-of-function	Somatic	Fusion	NA	Yes
P144	F	40	Breast	C50	8500	2018-02-09	172	OTH	m1A	II-B	NA	Single-agent	HRD	Composite biomarker	Somatic	Positive	DDR	Yes
P144	F	40	Breast	C50	8500	2018-02-09	172	OTH	m1A	II-B	NA	Single-agent	PTEN	Loss-of-function	Somatic	Underexpression	PAM	Yes
P144	F	40	Breast	C50	8500	2018-02-09	172	OTH	m1A	II-B	NA	Single-agent	PTEN	Loss-of-function	Somatic	Deletion	PAM	Yes
P144	F	40	Breast	C50	8500	2018-02-09	172	OTH	m1A	II-B	NA	Single-agent	RAD54L	Loss-of-function	Somatic	SNV/indel	DDR	Yes
P144	F	40	Breast	C50	8500	2018-02-09	172	OTH	m1A	II-B	NA	Single-agent	SBS3	Composite biomarker	Somatic	Mutational signature	DDR	Yes
P144	F	40	Breast	C50	8500	2018-02-09	172	IE,DDR	m2A	III-B	1	Combination	TMB	Composite biomarker	Somatic	Positive	IE	Yes
P144	F	40	Breast	C50	8500	2018-02-09	172	DDR,OTH	m2A	III-B	2	Combination	HRD	Composite biomarker	Somatic	Positive	DDR	Yes
P144	F	40	Breast	C50	8500	2018-02-09	172	DDR,OTH	m2A	III-B	2	Combination	PTEN	Loss-of-function	Somatic	Underexpression	PAM	Yes
P144	F	40	Breast	C50	8500	2018-02-09	172	DDR,OTH	m2A	III-B	2	Combination	PTEN	Loss-of-function	Somatic	Deletion	PAM	Yes
P144	F	40	Breast	C50	8500	2018-02-09	172	DDR,OTH	m2A	III-B	2	Combination	RAD54L	Loss-of-function	Somatic	SNV/indel	DDR	Yes
P144	F	40	Breast	C50	8500	2018-02-09	172	DDR,OTH	m2A	III-B	2	Combination	SBS3	Composite biomarker	Somatic	Mutational signature	DDR	Yes
P144	F	40	Breast	C50	8500	2018-02-09	172	DDR	m2A	III-B	3	Single-agent	HRD	Composite biomarker	Somatic	Positive	DDR	Yes
P144	F	40	Breast	C50	8500	2018-02-09	172	DDR	m2A	III-B	3	Single-agent	PTEN	Loss-of-function	Somatic	Underexpression	PAM	Yes
P144	F	40	Breast	C50	8500	2018-02-09	172	DDR	m2A	III-B	3	Single-agent	PTEN	Loss-of-function	Somatic	Deletion	PAM	Yes
P144	F	40	Breast	C50	8500	2018-02-09	172	DDR	m2A	III-B	3	Single-agent	RAD54L	Loss-of-function	Somatic	SNV/indel	DDR	Yes
P144	F	40	Breast	C50	8500	2018-02-09	172	DDR	m2A	III-B	3	Single-agent	SBS3	Composite biomarker	Somatic	Mutational signature	DDR	Yes
P144	F	40	Breast	C50	8500	2018-02-09	172	OTH	m3	IV-A	4	Single-agent	BRD4	Gain-of-function	Somatic	Overexpression	OTH	Yes
P144	F	40	Breast	C50	8500	2018-02-09	172	TK	m1B	III-B	5	Single-agent	FGFR2	Gain-of-function	Somatic	Overexpression	TK	Yes
P144	F	40	Breast	C50	8500	2018-02-09	172	TK	m1B	III-B	5	Single-agent	FGFR2	Gain-of-function	Somatic	Gain	TK	Yes
P144	F	40	Breast	C50	8500	2018-02-09	172	TK	m1B	III-B	5	Single-agent	KIT	Gain-of-function	Somatic	Overexpression	TK	Yes
P144	F	40	Breast	C50	8500	2018-02-09	172	TK	m1B	III-B	5	Single-agent	NTRK2	Gain-of-function	Somatic	Overexpression	TK	Yes
P144	F	40	Breast	C50	8500	2018-02-09	172	TK	m1B	III-B	5	Single-agent	NTRK3	Gain-of-function	Somatic	Overexpression	TK	Yes
P144	F	40	Breast	C50	8500	2018-02-09	172	IE,IE	m1B	II-B	6	Combination	LAG3	Gain-of-function	Somatic	Overexpression	IE	Yes
P144	F	40	Breast	C50	8500	2018-02-09	172	IE,IE	m1B	II-B	6	Combination	TMB	Composite biomarker	Somatic	Positive	IE	Yes
P145	M	45	Other	C45	9053	2016-04-22	19	IE	m2B	III-A	1	Single-agent	CD274	Gain-of-function	Somatic	Overexpression	IE	Yes
P145	M	45	Other	C45	9053	2016-04-22	19	IE	m2B	III-A	1	Single-agent	PDCD1LG2	Gain-of-function	Somatic	Overexpression	IE	Yes
P145	M	45	Other	C45	9053	2016-04-22	19	TK	m3	IV-A	2	Single-agent	FGF1	Gain-of-function	Somatic	Overexpression	TK	Yes
P145	M	45	Other	C45	9053	2016-04-22	19	TK	m3	IV-A	2	Single-agent	FGF2	Gain-of-function	Somatic	Overexpression	TK	Yes
P145	M	45	Other	C45	9053	2016-04-22	19	TK	m4	X	3	Single-agent	CD74	Gain-of-function	Somatic	Overexpression	NA	Yes
P145	M	45	Other	C45	9053	2016-04-22	19	TK	m4	X	3	Single-agent	ROS1	Gain-of-function	Somatic	Overexpression	TK	Yes
P146	M	59	Neuroendocrine and Adrenal	C25	8249	2018-07-06	21	NA	NA	NA	NA	NA	NA	NA	NA	NA	NA	No
P147	F	52	Upper Gastrointestinal	C16	8490	2014-07-18	65	NA	NA	NA	NA	NA	NA	NA	NA	NA	NA	No
P148	M	56	Urologic	C62	9080	2016-11-04	160	IE	m2B	III-A	1	Single-agent	TMB	Composite biomarker	Somatic	Positive	IE	Yes
P148	M	56	Urologic	C62	9080	2016-11-04	160	RME,TK	m2B	III-A	2	Combination	EGFR	Gain-of-function	Somatic	Overexpression	TK	Yes
P148	M	56	Urologic	C62	9080	2016-11-04	160	RME,TK	m2B	III-A	2	Combination	EGFR	Gain-of-function	Somatic	Gain	TK	Yes
P148	M	56	Urologic	C62	9080	2016-11-04	160	RME,TK	m2B	III-A	2	Combination	MAPK1	Gain-of-function	Somatic	Overexpression	RME	Yes
P148	M	56	Urologic	C62	9080	2016-11-04	160	RME,TK	m2B	III-A	2	Combination	MAPK1	Gain-of-function	Somatic	Gain	RME	Yes
P148	M	56	Urologic	C62	9080	2016-11-04	160	RME,TK	m2B	III-A	2	Combination	PTPN12	Loss-of-function	Somatic	Deletion	TK	Yes
P149	F	44	Gynecologic	C56	8631	2017-06-16	42	CC	m2C	NA	2	Single-agent	CDK4	Gain-of-function	Somatic	Overexpression	CC	Yes
P149	F	44	Gynecologic	C56	8631	2017-06-16	42	CC	m2C	NA	2	Single-agent	CDKN2A	Loss-of-function	Somatic	Deletion	CC	Yes
P149	F	44	Gynecologic	C56	8631	2017-06-16	42	CC	m2C	NA	2	Single-agent	CDKN2B	Loss-of-function	Somatic	Deletion	CC	Yes
P149	F	44	Gynecologic	C56	8631	2017-06-16	42	DDR,OTH	m3	IV-A	1	Combination	BRCA2	Loss-of-function	Germline	SNV/indel	DDR	Yes
P149	F	44	Gynecologic	C56	8631	2017-06-16	42	DDR,OTH	m3	IV-A	1	Combination	FANCA	Loss-of-function	Germline	SNV/indel	DDR	Yes
P149	F	44	Gynecologic	C56	8631	2017-06-16	42	DDR,OTH	m3	IV-A	1	Combination	FANCG	Loss-of-function	Germline	SNV/indel	DDR	Yes
P149	F	44	Gynecologic	C56	8631	2017-06-16	42	DDR,OTH	m3	IV-A	1	Combination	SBS8	Composite biomarker	Germline	Mutational signature	DDR	Yes
P149	F	44	Gynecologic	C56	8631	2017-06-16	42	NA	NA	NA	NA	NA	FANCG	Loss-of-function	Germline	NA	DDR	Yes
P150	M	54	Hematopoietic	C82	9690	2018-09-07	82	IE,CC	m2B	III-A	1	Combination	CDKN2A	Loss-of-function	Somatic	Deletion	CC	Yes
P150	M	54	Hematopoietic	C82	9690	2018-09-07	82	IE,CC	m2B	III-A	1	Combination	CDKN2B	Loss-of-function	Somatic	Deletion	CC	Yes
P150	M	54	Hematopoietic	C82	9690	2018-09-07	82	IE,CC	m2B	III-A	1	Combination	CTLA4	Gain-of-function	Somatic	Overexpression	IE	Yes
P150	M	54	Hematopoietic	C82	9690	2018-09-07	82	IE,CC	m2B	III-A	1	Combination	LAG3	Gain-of-function	Somatic	Overexpression	IE	Yes
P150	M	54	Hematopoietic	C82	9690	2018-09-07	82	IE,CC	m2B	III-A	1	Combination	PDCD1	Gain-of-function	Somatic	Overexpression	IE	Yes
P150	M	54	Hematopoietic	C82	9690	2018-09-07	82	IE,CC	m2B	III-A	1	Combination	TMB	Composite biomarker	Somatic	Positive	IE	Yes
P150	M	54	Hematopoietic	C82	9690	2018-09-07	82	TK	m4	X	2	Single-agent	NA	NA	NA	NA	NA	Yes
P150	M	54	Hematopoietic	C82	9690	2018-09-07	82	OTH	m4	X	3	Single-agent	SYK	Gain-of-function	Somatic	Overexpression	TK	Yes
P150	M	54	Hematopoietic	C82	9690	2018-09-07	82	TK	m2C	NA	4	Single-agent	NA	NA	NA	NA	NA	Yes
P151	F	45	Breast	C50	9020	2018-09-05	40	PAM	m2B	III-A	1	Single-agent	NF1	Loss-of-function	Somatic	Deletion	RME	No
P151	F	45	Breast	C50	9020	2018-09-05	40	PAM	m2B	III-A	1	Single-agent	PIK3CA	Gain-of-function	Somatic	SNV/indel	PAM	No
P151	F	45	Breast	C50	9020	2018-09-05	40	PAM	m2B	III-A	1	Single-agent	PTEN	Loss-of-function	Somatic	Deletion	PAM	No
P151	F	45	Breast	C50	9020	2018-09-05	40	DDR	m2C	NA	2	Single-agent	BARD1	Loss-of-function	Germline	SNV/indel	OTH	No
P151	F	45	Breast	C50	9020	2018-09-05	40	DDR	m2C	NA	2	Single-agent	FANCA	Loss-of-function	Somatic	Deletion	DDR	No
P151	F	45	Breast	C50	9020	2018-09-05	40	DDR	m2C	NA	2	Single-agent	PTEN	Loss-of-function	Somatic	Deletion	PAM	No
P151	F	45	Breast	C50	9020	2018-09-05	40	DDR	m2C	NA	2	Single-agent	SBS3	Composite biomarker	Germline	Mutational signature	DDR	No
P151	F	45	Breast	C50	9020	2018-09-05	40	DDR	m2C	NA	2	Single-agent	SBS3	Composite biomarker	Somatic	Mutational signature	DDR	No
P151	F	45	Breast	C50	9020	2018-09-05	40	OTH	m2B	III-A	1	Single-agent	NA	NA	NA	NA	NA	No
P151	F	45	Breast	C50	9020	2018-09-05	40	NA	NA	NA	NA	NA	BARD1	Loss-of-function	Germline	NA	OTH	No
P152	M	40	Hepatopancreaticobiliary	C25	8500	2017-09-08	53	DDR	m1B	I-C	1	Single-agent	BRCA2	Loss-of-function	Germline	SNV/indel	DDR	No
P152	M	40	Hepatopancreaticobiliary	C25	8500	2017-09-08	53	DDR	m1B	I-C	1	Single-agent	RAD54L	Loss-of-function	Somatic	SNV/indel	DDR	No
P152	M	40	Hepatopancreaticobiliary	C25	8500	2017-09-08	53	DDR	m1B	I-C	1	Single-agent	SBS3	Composite biomarker	NA	Mutational signature	DDR	No
P152	M	40	Hepatopancreaticobiliary	C25	8500	2017-09-08	53	RME,OTH	m3	IV-A	2	Combination	KRAS	Gain-of-function	Somatic	SNV/indel	RME	No
P152	M	40	Hepatopancreaticobiliary	C25	8500	2017-09-08	53	NA	NA	NA	NA	NA	BRCA2	Loss-of-function	Germline	NA	DDR	No
P153	M	58	Soft Tissue Other	C49	8815	2018-07-06	32	TK	m2C	NA	1	Single-agent	FGFR1	Gain-of-function	Somatic	Overexpression	TK	Yes
P153	M	58	Soft Tissue Other	C49	8815	2018-07-06	32	IE	m2C	NA	2	Single-agent	LAG3	Gain-of-function	Somatic	Overexpression	IE	Yes
P153	M	58	Soft Tissue Other	C49	8815	2018-07-06	32	IE	m2C	NA	2	Single-agent	TMB	Composite biomarker	Somatic	Negative	IE	Yes
P153	M	58	Soft Tissue Other	C49	8815	2018-07-06	32	DEV	m4	X	3	Single-agent	GLI2	Gain-of-function	Somatic	Overexpression	DEV	Yes
P153	M	58	Soft Tissue Other	C49	8815	2018-07-06	32	DEV	m4	X	3	Single-agent	GLI3	Gain-of-function	Somatic	Overexpression	DEV	Yes
P153	M	58	Soft Tissue Other	C49	8815	2018-07-06	32	DEV	m4	X	3	Single-agent	SMO	Gain-of-function	Somatic	Overexpression	DEV	Yes
P153	M	58	Soft Tissue Other	C49	8815	2018-07-06	32	path	NA	NA	NA	NA	NA	NA	NA	NA	NA	Yes
P154	M	41	Soft Tissue Other	C40	8810	2018-09-07	46	PAM	m2B	III-A	1	Single-agent	PTEN	Loss-of-function	Somatic	Deletion	PAM	No
P155	F	48	Breast	C50	8500	2016-08-12	78	DDR	m2B	III-B	1	Single-agent	FANCG	Loss-of-function	Somatic	SNV/indel	DDR	Yes
P155	F	48	Breast	C50	8500	2016-08-12	78	DDR	m2B	III-B	1	Single-agent	PALB2	Loss-of-function	Germline	SNV/indel	DDR	Yes
P155	F	48	Breast	C50	8500	2016-08-12	78	TK	m4	X	2	Single-agent	ERBB4	Gain-of-function	Somatic	Overexpression	TK	Yes
P155	F	48	Breast	C50	8500	2016-08-12	78	TK	m4	X	3	Single-agent	FGFR3	Gain-of-function	Somatic	Overexpression	TK	Yes
P155	F	48	Breast	C50	8500	2016-08-12	78	NA	NA	NA	NA	NA	PALB2	Loss-of-function	Germline	NA	DDR	Yes
P156	M	59	Soft Tissue Other	C38	9758	2014-06-20	23	NA	NA	NA	NA	NA	NA	NA	NA	NA	NA	Yes
P157	F	49	Leiomyosarcoma	C55	8890	2017-10-06	51	DDR	m2B	III-B	1	Single-agent	FANCA	Loss-of-function	Somatic	Deletion	DDR	Yes
P157	F	49	Leiomyosarcoma	C55	8890	2017-10-06	51	DDR	m2B	III-B	1	Single-agent	FANCE	Loss-of-function	Somatic	Deletion	DDR	Yes
P157	F	49	Leiomyosarcoma	C55	8890	2017-10-06	51	DDR	m2B	III-B	1	Single-agent	FANCG	Loss-of-function	Somatic	Deletion	DDR	Yes
P157	F	49	Leiomyosarcoma	C55	8890	2017-10-06	51	DDR	m2B	III-B	1	Single-agent	MLH3	Loss-of-function	Somatic	Deletion	DDR	Yes
P157	F	49	Leiomyosarcoma	C55	8890	2017-10-06	51	DDR	m2B	III-B	1	Single-agent	PTEN	Loss-of-function	Somatic	Deletion	PAM	Yes
P157	F	49	Leiomyosarcoma	C55	8890	2017-10-06	51	DDR	m2B	III-B	1	Single-agent	SBS3	Composite biomarker	Somatic	Mutational signature	DDR	Yes
P157	F	49	Leiomyosarcoma	C55	8890	2017-10-06	51	DDR	m2B	III-B	1	Single-agent	SBS8	Composite biomarker	Somatic	Mutational signature	DDR	Yes
P157	F	49	Leiomyosarcoma	C55	8890	2017-10-06	51	DDR	m2B	III-B	1	Single-agent	XRCC3	Loss-of-function	Somatic	Deletion	DDR	Yes
P158	M	50	Unknown Primary	C79	8020	2018-08-31	78	CC	m2C	NA	1	Single-agent	CDKN2A	Loss-of-function	Somatic	Underexpression	CC	Yes
P158	M	50	Unknown Primary	C79	8020	2018-08-31	78	CC	m2C	NA	1	Single-agent	CDKN2A	Loss-of-function	Somatic	Deletion	CC	Yes
P158	M	50	Unknown Primary	C79	8020	2018-08-31	78	CC	m2C	NA	1	Single-agent	CDKN2B	Loss-of-function	Somatic	Underexpression	CC	Yes
P158	M	50	Unknown Primary	C79	8020	2018-08-31	78	CC	m2C	NA	1	Single-agent	CDKN2B	Loss-of-function	Somatic	Deletion	CC	Yes
P158	M	50	Unknown Primary	C79	8020	2018-08-31	78	DDR	m2B	IV-B	3	Single-agent	SBS3	Composite biomarker	Somatic	Mutational signature	DDR	Yes
P158	M	50	Unknown Primary	C79	8020	2018-08-31	78	DDR	m2B	IV-B	3	Single-agent	SETD2	Loss-of-function	Somatic	SNV/indel	OTH	Yes
P158	M	50	Unknown Primary	C79	8020	2018-08-31	78	TK	m3	IV-A	2	Single-agent	FGFR4	Gain-of-function	Somatic	Overexpression	TK	Yes
P158	M	50	Unknown Primary	C79	8020	2018-08-31	78	TK	m3	IV-A	2	Single-agent	KDR	Gain-of-function	Somatic	Overexpression	TK	Yes
P159	M	47	Hepatopancreaticobiliary	C22	8160	2018-07-27	30	TK	m1B	II-B	1	Single-agent	FGFR1	Gain-of-function	Somatic	Gain	TK	No
P159	M	47	Hepatopancreaticobiliary	C22	8160	2018-07-27	30	TK	m1B	II-B	1	Single-agent	FGFR2	Gain-of-function	Somatic	Fusion	TK	No
P159	M	47	Hepatopancreaticobiliary	C22	8160	2018-07-27	30	TK	m1B	II-B	1	Single-agent	GAB2	Gain-of-function	Somatic	Fusion	NA	No
P159	M	47	Hepatopancreaticobiliary	C22	8160	2018-07-27	30	TK	m2C	NA	2	Single-agent	FGFR1	Gain-of-function	Somatic	Gain	TK	No
P159	M	47	Hepatopancreaticobiliary	C22	8160	2018-07-27	30	TK	m2C	NA	2	Single-agent	FGFR2	Gain-of-function	Somatic	Fusion	TK	No
P159	M	47	Hepatopancreaticobiliary	C22	8160	2018-07-27	30	TK	m2C	NA	2	Single-agent	GAB2	Gain-of-function	Somatic	Fusion	NA	No
P160	M	45	Neuroendocrine and Adrenal	C34	8249	2017-08-04	28	TK	m3	IV-A	1	Single-agent	FGFR2	Gain-of-function	Somatic	Overexpression	TK	Yes
P160	M	45	Neuroendocrine and Adrenal	C34	8249	2017-08-04	28	TK	m3	IV-A	1	Single-agent	FGFR3	Gain-of-function	Somatic	Overexpression	TK	Yes
P160	M	45	Neuroendocrine and Adrenal	C34	8249	2017-08-04	28	TK	m3	IV-A	1	Single-agent	FGFR4	Gain-of-function	Somatic	Overexpression	TK	Yes
P160	M	45	Neuroendocrine and Adrenal	C34	8249	2017-08-04	28	IE	m3	IV-A	2	Single-agent	CTAG1B	Gain-of-function	Somatic	Overexpression	IE	Yes
P161	F	36	Soft Tissue Other	C49	8821	2018-04-10	19	OTH	m4	X	3	Single-agent	CTNNB1	Gain-of-function	Somatic	SNV/indel	DEV	Yes
P161	F	36	Soft Tissue Other	C49	8821	2018-04-10	19	TK	m2C	NA	1	Single-agent	FLT4	Gain-of-function	Somatic	Overexpression	TK	Yes
P161	F	36	Soft Tissue Other	C49	8821	2018-04-10	19	TK	m2C	NA	1	Single-agent	PDGFA	Gain-of-function	Somatic	Overexpression	TK	Yes
P161	F	36	Soft Tissue Other	C49	8821	2018-04-10	19	TK	m2C	NA	1	Single-agent	PDGFB	Gain-of-function	Somatic	Overexpression	TK	Yes
P161	F	36	Soft Tissue Other	C49	8821	2018-04-10	19	TK	m2C	NA	1	Single-agent	TEK	Gain-of-function	Somatic	Overexpression	TK	Yes
P161	F	36	Soft Tissue Other	C49	8821	2018-04-10	19	DEV	m3	IV-A	2	Single-agent	CTNNB1	Gain-of-function	Somatic	SNV/indel	DEV	Yes
P161	F	36	Soft Tissue Other	C49	8821	2018-04-10	19	DEV	m3	IV-A	2	Single-agent	MAFB	Gain-of-function	Somatic	SNV/indel	NA	Yes
P162	F	45	Soft Tissue Other	C53	8933	2018-07-27	44	TK	m2A	I-C	1	Single-agent	NTRK1	Gain-of-function	Somatic	Overexpression	TK	Yes
P162	F	45	Soft Tissue Other	C53	8933	2018-07-27	44	TK	m2A	I-C	1	Single-agent	NTRK1	Gain-of-function	Somatic	Fusion	TK	Yes
P162	F	45	Soft Tissue Other	C53	8933	2018-07-27	44	TK	m2A	I-C	1	Single-agent	TPM3	Gain-of-function	Somatic	Fusion	NA	Yes
P162	F	45	Soft Tissue Other	C53	8933	2018-07-27	44	TK	m2A	I-C	1	Single-agent	TPM3	Gain-of-function	Somatic	Overexpression	NA	Yes
P162	F	45	Soft Tissue Other	C53	8933	2018-07-27	44	IE	m2B	I-C	2	Single-agent	CDKN2A	Loss-of-function	Somatic	Deletion	CC	Yes
P162	F	45	Soft Tissue Other	C53	8933	2018-07-27	44	IE	m2B	I-C	2	Single-agent	CDKN2A	Loss-of-function	Somatic	Underexpression	CC	Yes
P162	F	45	Soft Tissue Other	C53	8933	2018-07-27	44	IE	m2B	I-C	2	Single-agent	CDKN2B	Loss-of-function	Somatic	Underexpression	CC	Yes
P162	F	45	Soft Tissue Other	C53	8933	2018-07-27	44	IE	m2B	I-C	2	Single-agent	CDKN2B	Loss-of-function	Somatic	Deletion	CC	Yes
P162	F	45	Soft Tissue Other	C53	8933	2018-07-27	44	CC	m2C	NA	3	Single-agent	ESR1	Gain-of-function	Somatic	Underexpression	DEV	Yes
P162	F	45	Soft Tissue Other	C53	8933	2018-07-27	44	CC	m2C	NA	3	Single-agent	FOXL2	Gain-of-function	Somatic	Overexpression	DEV	Yes
P162	F	45	Soft Tissue Other	C53	8933	2018-07-27	44	OTH	m2B	III-A	1	Single-agent	CTLA4	Gain-of-function	Somatic	Overexpression	IE	Yes
P162	F	45	Soft Tissue Other	C53	8933	2018-07-27	44	OTH	m2B	III-A	1	Single-agent	TMB	Composite biomarker	Somatic	Negative	IE	Yes
P163	M	56	Soft Tissue Other	C49	8800	2018-03-02	44	IE	m2B	III-B	1	Single-agent	CD274	Gain-of-function	Somatic	Gain	IE	Yes
P163	M	56	Soft Tissue Other	C49	8800	2018-03-02	44	IE	m2B	III-B	1	Single-agent	PDCD1LG2	Gain-of-function	Somatic	Gain	IE	Yes
P163	M	56	Soft Tissue Other	C49	8800	2018-03-02	44	IE	m2B	III-B	1	Single-agent	TMB	Composite biomarker	Somatic	Negative	IE	Yes
P163	M	56	Soft Tissue Other	C49	8800	2018-03-02	44	RME	m2B	III-A	2	Single-agent	NF1	Loss-of-function	Somatic	SNV/indel	RME	Yes
P163	M	56	Soft Tissue Other	C49	8800	2018-03-02	44	PAM	m2B	III-A	2	Single-agent	NF1	Loss-of-function	Somatic	SNV/indel	RME	Yes
P163	M	56	Soft Tissue Other	C49	8800	2018-03-02	44	TK	m3	IV-A	3	Single-agent	ROS1	Gain-of-function	Somatic	Overexpression	TK	Yes
P163	M	56	Soft Tissue Other	C49	8800	2018-03-02	44	NA	NA	NA	NA	NA	WRN	Loss-of-function	Germline	NA	DDR	Yes
P164	M	45	Head and Neck	C01	8052	2015-07-10	82	NA	NA	NA	NA	NA	NA	NA	NA	NA	NA	Yes
P165	M	49	Colorectal	C18	8140	2018-11-16	104	IE,RME	m2B	III-A	1	Combination	KRAS	Gain-of-function	Somatic	SNV/indel	RME	No
P165	M	49	Colorectal	C18	8140	2018-11-16	104	IE,RME	m2B	III-A	1	Combination	TMB	Composite biomarker	Somatic	Positive	IE	No
P165	M	49	Colorectal	C18	8140	2018-11-16	104	RME	m2C	NA	2	Single-agent	KRAS	Gain-of-function	Somatic	SNV/indel	RME	No
P165	M	49	Colorectal	C18	8140	2018-11-16	104	RME,TK	m3	IV-A	3	Combination	ERBB3	Gain-of-function	Somatic	Gain	TK	No
P165	M	49	Colorectal	C18	8140	2018-11-16	104	RME,TK	m3	IV-A	3	Combination	KRAS	Gain-of-function	Somatic	SNV/indel	RME	No
P165	M	49	Colorectal	C18	8140	2018-11-16	104	RME	m3	IV-A	4	Single-agent	KRAS	Gain-of-function	Somatic	SNV/indel	RME	No
P166	F	39	Neuroendocrine and Adrenal	C37	8246	2018-06-01	28	TK	m3	IV-A	1	Single-agent	ASCL1	Gain-of-function	Somatic	Overexpression	OTH	Yes
P166	F	39	Neuroendocrine and Adrenal	C37	8246	2018-06-01	28	TK	m3	IV-A	1	Single-agent	BRD3	Gain-of-function	Somatic	Overexpression	OTH	Yes
P166	F	39	Neuroendocrine and Adrenal	C37	8246	2018-06-01	28	TK	m3	IV-A	1	Single-agent	MYCL	Gain-of-function	Somatic	Overexpression	CC	Yes
P166	F	39	Neuroendocrine and Adrenal	C37	8246	2018-06-01	28	DEV	m2C	III-A	2	Single-agent	DLL3	Gain-of-function	Somatic	Overexpression	DEV	Yes
P166	F	39	Neuroendocrine and Adrenal	C37	8246	2018-06-01	28	OTH	m3	IV-A	3	Single-agent	ASCL1	Gain-of-function	Somatic	Overexpression	OTH	Yes
P166	F	39	Neuroendocrine and Adrenal	C37	8246	2018-06-01	28	OTH	m3	IV-A	3	Single-agent	BRD3	Gain-of-function	Somatic	Overexpression	OTH	Yes
P166	F	39	Neuroendocrine and Adrenal	C37	8246	2018-06-01	28	OTH	m3	IV-A	3	Single-agent	MYCL	Gain-of-function	Somatic	Overexpression	CC	Yes
P167	F	53	Neuroendocrine and Adrenal	C80	8249	2017-05-05	30	TK	m3	IV-A	1	Single-agent	RET	Gain-of-function	Somatic	Overexpression	TK	Yes
P167	F	53	Neuroendocrine and Adrenal	C80	8249	2017-05-05	30	TK	m2B	III-A	2	Single-agent	EGFR	Gain-of-function	Somatic	Overexpression	TK	Yes
P168	F	44	Hepatopancreaticobiliary	C25	8560	2015-10-16	81	NA	NA	NA	NA	NA	NA	NA	NA	NA	NA	No
P169	F	49	Leiomyosarcoma	C25	8890	2016-09-30	44	PAM	m2B	III-A	1	Single-agent	PTEN	Loss-of-function	Somatic	Deletion	PAM	No
P169	F	49	Leiomyosarcoma	C25	8890	2016-09-30	44	DDR	m3	IV-A	1	Single-agent	CHD1	Loss-of-function	Somatic	SNV/indel	NA	No
P169	F	49	Leiomyosarcoma	C25	8890	2016-09-30	44	DDR	m3	IV-A	1	Single-agent	ERCC1	Loss-of-function	Somatic	Deletion	DDR	No
P169	F	49	Leiomyosarcoma	C25	8890	2016-09-30	44	DDR	m3	IV-A	1	Single-agent	ERCC2	Loss-of-function	Somatic	Deletion	DDR	No
P169	F	49	Leiomyosarcoma	C25	8890	2016-09-30	44	DDR	m3	IV-A	1	Single-agent	LIG1	Loss-of-function	Somatic	Deletion	DDR	No
P169	F	49	Leiomyosarcoma	C25	8890	2016-09-30	44	DDR	m3	IV-A	1	Single-agent	RPA1	Loss-of-function	Somatic	Deletion	DDR	No
P169	F	49	Leiomyosarcoma	C25	8890	2016-09-30	44	DDR	m3	IV-A	1	Single-agent	SBS3	Composite biomarker	Somatic	Mutational signature	DDR	No
P169	F	49	Leiomyosarcoma	C25	8890	2016-09-30	44	NA	NA	NA	NA	NA	WRN	Loss-of-function	Germline	NA	DDR	No
P170	M	28	Urologic	C38	9071	2015-08-28	24	CC	m3	IV-A	1	Single-agent	CDK6	Gain-of-function	Somatic	Gain	CC	No
P171	F	49	Colorectal	C18	8140	2015-12-18	79	RME,TK	m2C	NA	1	Combination	MAP2K1	Gain-of-function	Somatic	SNV/indel	RME	Yes
P172	M	49	Neuroendocrine and Adrenal	C18	8244	2018-02-09	15400	IE,IE	m2A	I-C	1	Combination	MSH6	Loss-of-function	Germline	SNV/indel	DDR	No
P172	M	49	Neuroendocrine and Adrenal	C18	8244	2018-02-09	15400	IE,IE	m2A	I-C	1	Combination	TMB	Composite biomarker	Somatic	Positive	IE	No
P172	M	49	Neuroendocrine and Adrenal	C18	8244	2018-02-09	15400	NA	NA	NA	NA	NA	MSH6	Loss-of-function	Germline	NA	DDR	No
P173	M	34	Other	C71	9401	2018-07-06	34	OTH	m1A	I-A	1	Single-agent	IDH1	Gain-of-function	Somatic	SNV/indel	OTH	Yes
P173	M	34	Other	C71	9401	2018-07-06	34	OTH	m2A	III-A	2	Single-agent	IDH1	Gain-of-function	Somatic	SNV/indel	OTH	Yes
P173	M	34	Other	C71	9401	2018-07-06	34	DDR	m3	IV-A	3	Single-agent	ATR	Loss-of-function	Somatic	Deletion	DDR	Yes
P173	M	34	Other	C71	9401	2018-07-06	34	DDR	m3	IV-A	3	Single-agent	ATR	Loss-of-function	Somatic	Underexpression	DDR	Yes
P173	M	34	Other	C71	9401	2018-07-06	34	DDR	m3	IV-A	3	Single-agent	CHEK1	Loss-of-function	Somatic	Underexpression	DDR	Yes
P173	M	34	Other	C71	9401	2018-07-06	34	DDR	m3	IV-A	3	Single-agent	PNKP	Loss-of-function	Somatic	Deletion	DDR	Yes
P173	M	34	Other	C71	9401	2018-07-06	34	DDR	m3	IV-A	3	Single-agent	RAD51	Loss-of-function	Somatic	Deletion	DDR	Yes
P173	M	34	Other	C71	9401	2018-07-06	34	DDR	m3	IV-A	3	Single-agent	RAD51	Loss-of-function	Somatic	Underexpression	DDR	Yes
P174	F	80	Hepatopancreaticobiliary	C25	8500	2015-08-07	36	PAM	m4	X	1	Single-agent	PIK3CA	Gain-of-function	Somatic	Gain	PAM	Yes
P174	F	80	Hepatopancreaticobiliary	C25	8500	2015-08-07	36	CC	m3	IV-A	2	Single-agent	CDK6	Gain-of-function	Somatic	Gain	CC	Yes
P174	F	80	Hepatopancreaticobiliary	C25	8500	2015-08-07	36	CC	m3	IV-A	2	Single-agent	CDKN2A	Loss-of-function	Somatic	Deletion	CC	Yes
P174	F	80	Hepatopancreaticobiliary	C25	8500	2015-08-07	36	TK,TK	m3	IV-A	3	Combination	ERBB2	Gain-of-function	Somatic	Overexpression	TK	Yes
P174	F	80	Hepatopancreaticobiliary	C25	8500	2015-08-07	36	TK,TK	m3	IV-A	3	Combination	ERBB3	Gain-of-function	Somatic	Overexpression	TK	Yes
P174	F	80	Hepatopancreaticobiliary	C25	8500	2015-08-07	36	TK,TK	m3	IV-A	3	Combination	MAP2K2	Gain-of-function	Somatic	Overexpression	RME	Yes
P174	F	80	Hepatopancreaticobiliary	C25	8500	2015-08-07	36	TK,TK	m3	IV-A	3	Combination	MAPK3	Gain-of-function	Somatic	Overexpression	RME	Yes
P175	F	37	Gynecologic	C53	8070	2017-07-21	537	DDR	m2B	III-A	2	Single-agent	ATM	Loss-of-function	Somatic	Deletion	DDR	Yes
P175	F	37	Gynecologic	C53	8070	2017-07-21	537	DDR	m2B	III-A	2	Single-agent	BRCA1	Loss-of-function	Germline	SNV/indel	DDR	Yes
P175	F	37	Gynecologic	C53	8070	2017-07-21	537	DDR	m2B	III-A	2	Single-agent	DDB1	Loss-of-function	Somatic	Deletion	DDR	Yes
P175	F	37	Gynecologic	C53	8070	2017-07-21	537	DDR	m2B	III-A	2	Single-agent	MRE11	Loss-of-function	Somatic	Deletion	DDR	Yes
P175	F	37	Gynecologic	C53	8070	2017-07-21	537	DDR	m2B	III-A	2	Single-agent	USP11	Loss-of-function	Somatic	Deletion	CC	Yes
P175	F	37	Gynecologic	C53	8070	2017-07-21	537	IE,RME	m2B	III-A	1	Combination	KRAS	Gain-of-function	Somatic	SNV/indel	RME	Yes
P175	F	37	Gynecologic	C53	8070	2017-07-21	537	IE,RME	m2B	III-A	1	Combination	MSH6	Loss-of-function	Germline	SNV/indel	DDR	Yes
P175	F	37	Gynecologic	C53	8070	2017-07-21	537	IE,RME	m2B	III-A	1	Combination	SBS26	Composite biomarker	Germline	Mutational signature	NA	Yes
P175	F	37	Gynecologic	C53	8070	2017-07-21	537	IE,RME	m2B	III-A	1	Combination	TMB	Composite biomarker	Germline	Positive	IE	Yes
P175	F	37	Gynecologic	C53	8070	2017-07-21	537	NA	NA	NA	NA	NA	MSH6	Loss-of-function	Germline	NA	DDR	Yes
P175	F	37	Gynecologic	C53	8070	2017-07-21	537	NA	NA	NA	NA	NA	BRCA1	Loss-of-function	Germline	NA	DDR	Yes
P176	F	48	Hematopoietic	C83	9680	2015-11-13	264	IE	m2B	III-A	1	Single-agent	TMB	Composite biomarker	Somatic	Positive	IE	No
P177	M	36	Ewing/PNET	C40	9260	2016-12-23	22	TK	m4	X	1	Single-agent	FGF4	Gain-of-function	Somatic	Overexpression	TK	Yes
P177	M	36	Ewing/PNET	C40	9260	2016-12-23	22	TK	m4	X	1	Single-agent	KIT	Gain-of-function	Somatic	SNV/indel	TK	Yes
P177	M	36	Ewing/PNET	C40	9260	2016-12-23	22	TK	m4	X	1	Single-agent	KIT	Gain-of-function	Somatic	Overexpression	TK	Yes
P177	M	36	Ewing/PNET	C40	9260	2016-12-23	22	OTH	m3	IV-A	2	Single-agent	EZH2	Gain-of-function	Somatic	Overexpression	OTH	Yes
P177	M	36	Ewing/PNET	C40	9260	2016-12-23	22	CC	m3	IV-A	3	Single-agent	CDKN2A	Loss-of-function	Somatic	Deletion	CC	Yes
P177	M	36	Ewing/PNET	C40	9260	2016-12-23	22	CC	m3	IV-A	3	Single-agent	CDKN2B	Loss-of-function	Somatic	Deletion	CC	Yes
P178	M	50	Neuroendocrine and Adrenal	C20	8249	2016-01-15	20	DDR,OTH	m2B	IV-A	1	Combination	ATM	Loss-of-function	Somatic	Deletion	DDR	No
P178	M	50	Neuroendocrine and Adrenal	C20	8249	2016-01-15	20	TK	m2C	NA	2	Single-agent	ERRFI1	Loss-of-function	Somatic	Deletion	TK	No
P179	F	34	Bone	C40	9181	2018-06-29	236	DDR,OTH	m2B	III-B	1	Combination	SBS3	Composite biomarker	Somatic	Mutational signature	DDR	Yes
P179	F	34	Bone	C40	9181	2018-06-29	236	DDR,OTH	m2B	III-B	1	Combination	SBS8	Composite biomarker	Somatic	Mutational signature	DDR	Yes
P179	F	34	Bone	C40	9181	2018-06-29	236	IE	m2B	I-C	2	Single-agent	TMB	Composite biomarker	Somatic	Positive	IE	Yes
P179	F	34	Bone	C40	9181	2018-06-29	236	TK	m2B	III-B	3	Single-agent	FGFR2	Gain-of-function	Somatic	Overexpression	TK	Yes
P179	F	34	Bone	C40	9181	2018-06-29	236	TK	m2B	III-B	3	Single-agent	FGFR3	Gain-of-function	Somatic	Overexpression	TK	Yes
P180	F	47	Neuroendocrine and Adrenal	C80	8246	2017-09-15	78	PAM	m2B	III-A	1	Single-agent	PTEN	Loss-of-function	Somatic	SNV/indel	PAM	Yes
P180	F	47	Neuroendocrine and Adrenal	C80	8246	2017-09-15	78	PAM	m2B	III-A	1	Single-agent	RPTOR	Gain-of-function	Somatic	Overexpression	PAM	Yes
P180	F	47	Neuroendocrine and Adrenal	C80	8246	2017-09-15	78	DDR	m2B	III-A	2	Single-agent	PALB2	Loss-of-function	Somatic	SNV/indel	DDR	Yes
P180	F	47	Neuroendocrine and Adrenal	C80	8246	2017-09-15	78	DDR	m2B	III-A	2	Single-agent	SBS8	Composite biomarker	NA	Mutational signature	DDR	Yes
P180	F	47	Neuroendocrine and Adrenal	C80	8246	2017-09-15	78	OTH	m2B	III-A	3	Single-agent	CLDN18	Gain-of-function	Somatic	Overexpression	IE	Yes
P181	F	52	Unknown Primary	C79	8140	2018-05-15	105	IE	m2B	III-A	2	Single-agent	TMB	Composite biomarker	Somatic	Positive	IE	Yes
P181	F	52	Unknown Primary	C79	8140	2018-05-15	105	TK	m2C	NA	1	Single-agent	FGFR1	Gain-of-function	Somatic	Overexpression	TK	Yes
P181	F	52	Unknown Primary	C79	8140	2018-05-15	105	TK	m2C	NA	1	Single-agent	FGFR1	Gain-of-function	Somatic	Gain	TK	Yes
P181	F	52	Unknown Primary	C79	8140	2018-05-15	105	TK	m2C	NA	1	Single-agent	FGFR2	Gain-of-function	Somatic	Overexpression	TK	Yes
P181	F	52	Unknown Primary	C79	8140	2018-05-15	105	TK	m2C	NA	1	Single-agent	FGFR3	Gain-of-function	Somatic	Overexpression	TK	Yes
P181	F	52	Unknown Primary	C79	8140	2018-05-15	105	TK	m2C	NA	1	Single-agent	FGFR4	Gain-of-function	Somatic	Overexpression	TK	Yes
P181	F	52	Unknown Primary	C79	8140	2018-05-15	105	OTH	m2A	III-A	3	Single-agent	CLDN18	Gain-of-function	Somatic	Overexpression	IE	Yes
P182	F	26	Ewing/PNET	C41	9260	2016-10-21	16	OTH	m3	IV-A	1	Single-agent	EZH2	Gain-of-function	Somatic	Overexpression	OTH	Yes
P182	F	26	Ewing/PNET	C41	9260	2016-10-21	16	TK	m3	IV-A	2	Single-agent	ALK	Gain-of-function	Somatic	Overexpression	TK	Yes
P182	F	26	Ewing/PNET	C41	9260	2016-10-21	16	TK	m3	IV-A	2	Single-agent	MERTK	Gain-of-function	Somatic	Overexpression	TK	Yes
P183	M	43	Neuroendocrine and Adrenal	C32	8041	2018-11-16	16	OTH	m3	IV-A	1	Single-agent	MYC	Gain-of-function	Somatic	Gain	CC	No
P183	M	43	Neuroendocrine and Adrenal	C32	8041	2018-11-16	16	NA	NA	NA	NA	NA	ERCC2	Loss-of-function	Germline	NA	DDR	No
P184	F	36	Upper Gastrointestinal	C16	8490	2018-07-11	29	TK	m1A	I-A	1	Single-agent	ERBB2	Gain-of-function	Somatic	Gain	TK	No
P184	F	36	Upper Gastrointestinal	C16	8490	2018-07-11	29	TK	m4	X	2	Single-agent	PTCH1	Loss-of-function	Somatic	SNV/indel	DEV	No
P185	M	21	Bone	C41	9220	2017-03-03	30	TK	m2C	NA	1	Single-agent	FGFR3	Gain-of-function	Somatic	Overexpression	TK	Yes
P185	M	21	Bone	C41	9220	2017-03-03	30	DDR	m2C	NA	2	Single-agent	SBS3	Composite biomarker	NA	Mutational signature	DDR	Yes
P185	M	21	Bone	C41	9220	2017-03-03	30	NA	NA	NA	NA	NA	RB1	Loss-of-function	Germline	NA	CC	Yes
P186	F	26	Ewing/PNET	C41	9260	2018-05-25	107	DDR,OTH	m2B	III-A	1	Combination	ATR	Loss-of-function	Somatic	Deletion	DDR	Yes
P186	F	26	Ewing/PNET	C41	9260	2018-05-25	107	DDR,OTH	m2B	III-A	1	Combination	CCND2	Gain-of-function	Somatic	Overexpression	CC	Yes
P186	F	26	Ewing/PNET	C41	9260	2018-05-25	107	DDR,OTH	m2B	III-A	1	Combination	CCNE1	Gain-of-function	Somatic	Overexpression	CC	Yes
P186	F	26	Ewing/PNET	C41	9260	2018-05-25	107	DDR,OTH	m2B	III-A	1	Combination	CIC	NA	Somatic	Fusion	OTH	Yes
P186	F	26	Ewing/PNET	C41	9260	2018-05-25	107	DDR,OTH	m2B	III-A	1	Combination	DUX4	NA	Somatic	Fusion	OTH	Yes
P186	F	26	Ewing/PNET	C41	9260	2018-05-25	107	DDR,OTH	m2B	III-A	1	Combination	FANCM	Loss-of-function	Somatic	Deletion	DDR	Yes
P186	F	26	Ewing/PNET	C41	9260	2018-05-25	107	DDR,OTH	m2B	III-A	1	Combination	NAMPT	Loss-of-function	Somatic	Deletion	OTH	Yes
P186	F	26	Ewing/PNET	C41	9260	2018-05-25	107	DDR,OTH	m2B	III-A	1	Combination	SBS3	Composite biomarker	Somatic	Mutational signature	DDR	Yes
P186	F	26	Ewing/PNET	C41	9260	2018-05-25	107	DDR,OTH	m2B	III-A	1	Combination	XRCC2	Loss-of-function	Somatic	Deletion	DDR	Yes
P186	F	26	Ewing/PNET	C41	9260	2018-05-25	107	OTH	m3	IV-A	2	Single-agent	CCND2	Gain-of-function	Somatic	Overexpression	CC	Yes
P186	F	26	Ewing/PNET	C41	9260	2018-05-25	107	OTH	m3	IV-A	2	Single-agent	CCNE1	Gain-of-function	Somatic	Overexpression	CC	Yes
P186	F	26	Ewing/PNET	C41	9260	2018-05-25	107	OTH	m3	IV-A	2	Single-agent	CIC	NA	Somatic	Fusion	OTH	Yes
P186	F	26	Ewing/PNET	C41	9260	2018-05-25	107	OTH	m3	IV-A	2	Single-agent	DUX4	NA	Somatic	Fusion	OTH	Yes
P187	M	29	Ewing/PNET	C41	9260	2018-02-06	13	DDR,OTH	m2B	III-A	1	Combination	BRCA1	Loss-of-function	Somatic	Underexpression	DDR	Yes
P187	M	29	Ewing/PNET	C41	9260	2018-02-06	13	DDR,OTH	m2B	III-A	1	Combination	CHEK1	Loss-of-function	Somatic	Underexpression	DDR	Yes
P187	M	29	Ewing/PNET	C41	9260	2018-02-06	13	DDR,OTH	m2B	III-A	1	Combination	RAD51	Loss-of-function	Somatic	Underexpression	DDR	Yes
P187	M	29	Ewing/PNET	C41	9260	2018-02-06	13	DDR,OTH	m2B	III-A	1	Combination	SBS3	Composite biomarker	Somatic	Mutational signature	DDR	Yes
P187	M	29	Ewing/PNET	C41	9260	2018-02-06	13	TK	m3	IV-A	2	Single-agent	NRG1	Gain-of-function	Somatic	Underexpression	TK	Yes
P187	M	29	Ewing/PNET	C41	9260	2018-02-06	13	OTH	m3	IV-A	3	Single-agent	ARID1A	Loss-of-function	Somatic	SNV/indel	OTH	Yes
P188	F	40	Soft Tissue Other	C49	8802	2018-05-25	34	DDR,OTH	m2C	NA	1	Combination	ATRX	Loss-of-function	Somatic	Fusion	OTH	Yes
P188	F	40	Soft Tissue Other	C49	8802	2018-05-25	34	DDR,OTH	m2C	NA	1	Combination	FANCA	Loss-of-function	Somatic	Deletion	DDR	Yes
P188	F	40	Soft Tissue Other	C49	8802	2018-05-25	34	DDR,OTH	m2C	NA	1	Combination	FANCF	Loss-of-function	Somatic	Deletion	DDR	Yes
P188	F	40	Soft Tissue Other	C49	8802	2018-05-25	34	DDR,OTH	m2C	NA	1	Combination	FANCG	Loss-of-function	Somatic	Deletion	DDR	Yes
P188	F	40	Soft Tissue Other	C49	8802	2018-05-25	34	DDR,OTH	m2C	NA	1	Combination	FANCG	Loss-of-function	Somatic	Deletion	DDR	Yes
P188	F	40	Soft Tissue Other	C49	8802	2018-05-25	34	DDR,OTH	m2C	NA	1	Combination	GUSBP5	Loss-of-function	Somatic	Fusion	NA	Yes
P188	F	40	Soft Tissue Other	C49	8802	2018-05-25	34	DDR,OTH	m2C	NA	1	Combination	HRD	Composite biomarker	Somatic	Positive	DDR	Yes
P188	F	40	Soft Tissue Other	C49	8802	2018-05-25	34	DDR,OTH	m2C	NA	1	Combination	MAPK12	Loss-of-function	Somatic	Underexpression	DDR	Yes
P188	F	40	Soft Tissue Other	C49	8802	2018-05-25	34	DDR,OTH	m2C	NA	1	Combination	MAPK12	Loss-of-function	Somatic	Deletion	DDR	Yes
P188	F	40	Soft Tissue Other	C49	8802	2018-05-25	34	DDR,OTH	m2C	NA	1	Combination	XRCC2	Loss-of-function	Somatic	Deletion	DDR	Yes
P188	F	40	Soft Tissue Other	C49	8802	2018-05-25	34	PAM,TK	m3	IV-A	2	Combination	IGF1R	Gain-of-function	Somatic	Overexpression	TK	Yes
P188	F	40	Soft Tissue Other	C49	8802	2018-05-25	34	PAM,TK	m3	IV-A	2	Combination	MIDN	Loss-of-function	Somatic	Underexpression	NA	Yes
P188	F	40	Soft Tissue Other	C49	8802	2018-05-25	34	PAM,TK	m3	IV-A	2	Combination	MIDN	Loss-of-function	Somatic	Fusion	NA	Yes
P188	F	40	Soft Tissue Other	C49	8802	2018-05-25	34	PAM,TK	m3	IV-A	2	Combination	NF2	Loss-of-function	Somatic	Deletion	PAM	Yes
P188	F	40	Soft Tissue Other	C49	8802	2018-05-25	34	PAM,TK	m3	IV-A	2	Combination	NF2	Loss-of-function	Somatic	Underexpression	PAM	Yes
P188	F	40	Soft Tissue Other	C49	8802	2018-05-25	34	PAM,TK	m3	IV-A	2	Combination	STK11	Loss-of-function	Somatic	Underexpression	PAM	Yes
P188	F	40	Soft Tissue Other	C49	8802	2018-05-25	34	PAM,TK	m3	IV-A	2	Combination	STK11	Loss-of-function	Somatic	Fusion	PAM	Yes
P188	F	40	Soft Tissue Other	C49	8802	2018-05-25	34	PAM	m2C	NA	3	Single-agent	MIDN	Loss-of-function	Somatic	Underexpression	NA	Yes
P188	F	40	Soft Tissue Other	C49	8802	2018-05-25	34	PAM	m2C	NA	3	Single-agent	MIDN	Loss-of-function	Somatic	Fusion	NA	Yes
P188	F	40	Soft Tissue Other	C49	8802	2018-05-25	34	PAM	m2C	NA	3	Single-agent	NF2	Loss-of-function	Somatic	Deletion	PAM	Yes
P188	F	40	Soft Tissue Other	C49	8802	2018-05-25	34	PAM	m2C	NA	3	Single-agent	NF2	Loss-of-function	Somatic	Underexpression	PAM	Yes
P188	F	40	Soft Tissue Other	C49	8802	2018-05-25	34	PAM	m2C	NA	3	Single-agent	RICTOR	Gain-of-function	Somatic	Gain	PAM	Yes
P188	F	40	Soft Tissue Other	C49	8802	2018-05-25	34	PAM	m2C	NA	3	Single-agent	STK11	Loss-of-function	Somatic	Underexpression	PAM	Yes
P188	F	40	Soft Tissue Other	C49	8802	2018-05-25	34	PAM	m2C	NA	3	Single-agent	STK11	Loss-of-function	Somatic	Fusion	PAM	Yes
P188	F	40	Soft Tissue Other	C49	8802	2018-05-25	34	OTH	m3	IV-A	1	Single-agent	MIDN	Loss-of-function	Somatic	Underexpression	NA	Yes
P188	F	40	Soft Tissue Other	C49	8802	2018-05-25	34	OTH	m3	IV-A	1	Single-agent	MIDN	Loss-of-function	Somatic	Fusion	NA	Yes
P188	F	40	Soft Tissue Other	C49	8802	2018-05-25	34	OTH	m3	IV-A	1	Single-agent	STK11	Loss-of-function	Somatic	Underexpression	PAM	Yes
P188	F	40	Soft Tissue Other	C49	8802	2018-05-25	34	OTH	m3	IV-A	1	Single-agent	STK11	Loss-of-function	Somatic	Fusion	PAM	Yes
P189	M	32	Synovial Sarcoma	C49	9041	2017-03-03	34	TK	m2C	III-A	1	Single-agent	EGFR	Gain-of-function	Somatic	SNV/indel	TK	Yes
P189	M	32	Synovial Sarcoma	C49	9041	2017-03-03	34	TK	m2C	III-A	1	Single-agent	EGFR	Gain-of-function	Somatic	Overexpression	TK	Yes
P189	M	32	Synovial Sarcoma	C49	9041	2017-03-03	34	TK	m2B	III-A	2	Single-agent	PDGFRA	Gain-of-function	Somatic	SNV/indel	TK	Yes
P189	M	32	Synovial Sarcoma	C49	9041	2017-03-03	34	TK	m2B	III-A	2	Single-agent	PDGFRA	Gain-of-function	Somatic	Overexpression	TK	Yes
P189	M	32	Synovial Sarcoma	C49	9041	2017-03-03	34	IE	m4	X	3	Single-agent	CTAG1B	Gain-of-function	Somatic	Overexpression	IE	Yes
P190	M	45	Hematopoietic	C84	9702	2015-08-07	9	NA	NA	NA	NA	NA	NA	NA	NA	NA	NA	No
P191	F	29	Soft Tissue Other	C49	9133	2015-09-25	3	PAM	m2C	NA	1	Single-agent	STK11	Loss-of-function	Somatic	Deletion	PAM	No
P191	F	29	Soft Tissue Other	C49	9133	2015-09-25	3	PAM	m2C	NA	1	Single-agent	TSC2	Loss-of-function	Somatic	Deletion	PAM	No
P192	F	47	Hepatopancreaticobiliary	C22	8160	2018-06-29	35	TK	m2C	NA	1	Single-agent	FGFR2	Gain-of-function	Somatic	SNV/indel	TK	Yes
P192	F	47	Hepatopancreaticobiliary	C22	8160	2018-06-29	35	TK	m2C	NA	1	Single-agent	FGFR2	Gain-of-function	Somatic	Overexpression	TK	Yes
P192	F	47	Hepatopancreaticobiliary	C22	8160	2018-06-29	35	TK	m2C	NA	1	Single-agent	FGFR3	Gain-of-function	Somatic	Overexpression	TK	Yes
P192	F	47	Hepatopancreaticobiliary	C22	8160	2018-06-29	35	TK	m2C	NA	1	Single-agent	FGFR4	Gain-of-function	Somatic	Overexpression	TK	Yes
P192	F	47	Hepatopancreaticobiliary	C22	8160	2018-06-29	35	DDR,OTH	m3	IV-A	2	Combination	BAP1	Loss-of-function	Somatic	SNV/indel	DDR	Yes
P192	F	47	Hepatopancreaticobiliary	C22	8160	2018-06-29	35	TK	m2B	IV-A	3	Single-agent	ERBB3	Gain-of-function	Somatic	Overexpression	TK	Yes
P192	F	47	Hepatopancreaticobiliary	C22	8160	2018-06-29	35	TK	m2B	IV-A	3	Single-agent	NRG1	Gain-of-function	Somatic	Overexpression	TK	Yes
P193	M	32	Hepatopancreaticobiliary	C22	8160	2017-12-05	75	TK	m2A	III-A	1	Single-agent	ERBB2	Gain-of-function	Somatic	Gain	TK	Yes
P193	M	32	Hepatopancreaticobiliary	C22	8160	2017-12-05	75	TK	m2A	III-A	1	Single-agent	ERBB2	Gain-of-function	Somatic	Overexpression	TK	Yes
P193	M	32	Hepatopancreaticobiliary	C22	8160	2017-12-05	75	CC	m2C	NA	2	Single-agent	MDM2	Gain-of-function	Somatic	Overexpression	CC	Yes
P193	M	32	Hepatopancreaticobiliary	C22	8160	2017-12-05	75	CC	m2C	NA	2	Single-agent	MDM2	Gain-of-function	Somatic	Gain	CC	Yes
P194	F	68	Head and Neck	C07	8200	2018-01-12	22	OTH	m1B	I-B	1	Single-agent	MYB	Gain-of-function	Somatic	Fusion	OTH	Yes
P194	F	68	Head and Neck	C07	8200	2018-01-12	22	OTH	m1B	I-B	1	Single-agent	NFIB	Gain-of-function	Somatic	Fusion	OTH	Yes
P194	F	68	Head and Neck	C07	8200	2018-01-12	22	OTH	m1B	I-B	1	Single-agent	SETBP1	Loss-of-function	Somatic	SNV/indel	NA	Yes
P194	F	68	Head and Neck	C07	8200	2018-01-12	22	TK	m2C	X	2	Single-agent	DDR1	Gain-of-function	Somatic	Overexpression	TK	Yes
P194	F	68	Head and Neck	C07	8200	2018-01-12	22	TK	m2C	X	2	Single-agent	FGF2	Gain-of-function	Somatic	Overexpression	TK	Yes
P194	F	68	Head and Neck	C07	8200	2018-01-12	22	TK	m2C	X	2	Single-agent	FGFR1	Gain-of-function	Somatic	Overexpression	TK	Yes
P194	F	68	Head and Neck	C07	8200	2018-01-12	22	TK	m2C	X	2	Single-agent	FGFR2	Gain-of-function	Somatic	Overexpression	TK	Yes
P194	F	68	Head and Neck	C07	8200	2018-01-12	22	TK	m2C	X	2	Single-agent	IGF1R	Gain-of-function	Somatic	Overexpression	TK	Yes
P194	F	68	Head and Neck	C07	8200	2018-01-12	22	TK	m2C	X	2	Single-agent	KIT	Gain-of-function	Somatic	Overexpression	TK	Yes
P194	F	68	Head and Neck	C07	8200	2018-01-12	22	TK	m2C	X	2	Single-agent	PDGFA	Gain-of-function	Somatic	Overexpression	TK	Yes
P194	F	68	Head and Neck	C07	8200	2018-01-12	22	TK	m2C	X	2	Single-agent	PDGFB	Gain-of-function	Somatic	Overexpression	TK	Yes
P194	F	68	Head and Neck	C07	8200	2018-01-12	22	DEV	m1B	I-B	3	Single-agent	NOTCH1	Gain-of-function	Somatic	Overexpression	DEV	Yes
P194	F	68	Head and Neck	C07	8200	2018-01-12	22	OTH	m3	IV-A	4	Single-agent	MYB	Gain-of-function	Somatic	Fusion	OTH	Yes
P194	F	68	Head and Neck	C07	8200	2018-01-12	22	OTH	m3	IV-A	4	Single-agent	NFIB	Gain-of-function	Somatic	Fusion	OTH	Yes
P194	F	68	Head and Neck	C07	8200	2018-01-12	22	OTH	m3	IV-A	4	Single-agent	SETBP1	Loss-of-function	Somatic	SNV/indel	NA	Yes
P195	M	65	Bone	C41	9370	2014-07-18	19	NA	NA	NA	NA	NA	NA	NA	NA	NA	NA	No
P196	M	53	Bone	C41	9370	2016-07-29	141	IE	m2B	III-A	1	Single-agent	TMB	Composite biomarker	Somatic	Positive	IE	Yes
P196	M	53	Bone	C41	9370	2016-07-29	141	CC	m2C	X	2	Single-agent	CDK6	Gain-of-function	Somatic	Overexpression	CC	Yes
P196	M	53	Bone	C41	9370	2016-07-29	141	CC	m2C	X	2	Single-agent	CDKN2A	Loss-of-function	Somatic	Deletion	CC	Yes
P196	M	53	Bone	C41	9370	2016-07-29	141	CC	m2C	X	2	Single-agent	CDKN2B	Loss-of-function	Somatic	Deletion	CC	Yes
P196	M	53	Bone	C41	9370	2016-07-29	141	DDR	m2B	III-A	3	Single-agent	BRCA2	Loss-of-function	Somatic	Deletion	DDR	Yes
P196	M	53	Bone	C41	9370	2016-07-29	141	DDR	m2B	III-A	3	Single-agent	ERCC6	Loss-of-function	Somatic	Deletion	DDR	Yes
P196	M	53	Bone	C41	9370	2016-07-29	141	DDR	m2B	III-A	3	Single-agent	RAD51AP1	Loss-of-function	Somatic	Deletion	DDR	Yes
P197	F	51	Liposarcoma	C34	8853	2018-06-12	36	DDR,OTH	m2B	III-A	1	Combination	NBN	Loss-of-function	Germline	SNV/indel	DDR	No
P197	F	51	Liposarcoma	C34	8853	2018-06-12	36	DDR,OTH	m2B	III-A	1	Combination	SBS3	Composite biomarker	Somatic	Mutational signature	DDR	No
P197	F	51	Liposarcoma	C34	8853	2018-06-12	36	DDR,OTH	m2B	III-A	1	Combination	SBS8	Composite biomarker	Somatic	Mutational signature	DDR	No
P197	F	51	Liposarcoma	C34	8853	2018-06-12	36	PAM	m2B	III-A	2	Single-agent	PIK3CA	Gain-of-function	Somatic	SNV/indel	PAM	No
P197	F	51	Liposarcoma	C34	8853	2018-06-12	36	NA	NA	NA	NA	NA	NBN	Loss-of-function	Germline	NA	DDR	No
P198	F	65	Other	C37	8046	2016-09-23	85	TK	m2C	NA	1	Single-agent	RET	Gain-of-function	Somatic	Overexpression	TK	Yes
P198	F	65	Other	C37	8046	2016-09-23	85	TK	m2C	NA	1	Single-agent	RET	Gain-of-function	Somatic	Gain	TK	Yes
P198	F	65	Other	C37	8046	2016-09-23	85	DDR	m4	X	2	Single-agent	SETD2	Loss-of-function	Somatic	SNV/indel	OTH	Yes
P199	F	72	Bone	C41	9370	2018-06-12	21	CC	m2C	NA	1	Single-agent	CDKN2A	Loss-of-function	Somatic	Deletion	CC	Yes
P199	F	72	Bone	C41	9370	2018-06-12	21	CC	m2C	NA	1	Single-agent	CDKN2B	Loss-of-function	Somatic	Deletion	CC	Yes
P199	F	72	Bone	C41	9370	2018-06-12	21	DDR	m2C	NA	2	Single-agent	HRD	Composite biomarker	Somatic	Positive	DDR	Yes
P199	F	72	Bone	C41	9370	2018-06-12	21	DDR	m2C	NA	2	Single-agent	PALB2	Loss-of-function	Somatic	Deletion	DDR	Yes
P199	F	72	Bone	C41	9370	2018-06-12	21	DDR	m2C	NA	2	Single-agent	PALB2	Loss-of-function	Somatic	Underexpression	DDR	Yes
P199	F	72	Bone	C41	9370	2018-06-12	21	DDR	m2C	NA	2	Single-agent	SBS3	Composite biomarker	Somatic	Mutational signature	DDR	Yes
P199	F	72	Bone	C41	9370	2018-06-12	21	DDR	m2C	NA	2	Single-agent	SBS8	Composite biomarker	Somatic	Mutational signature	DDR	Yes
P199	F	72	Bone	C41	9370	2018-06-12	21	IE,IE	m2C	NA	3	Combination	CD274	Gain-of-function	Somatic	Overexpression	IE	Yes
P199	F	72	Bone	C41	9370	2018-06-12	21	IE,IE	m2C	NA	3	Combination	CTLA4	Gain-of-function	Somatic	Overexpression	IE	Yes
P199	F	72	Bone	C41	9370	2018-06-12	21	IE,IE	m2C	NA	3	Combination	MAGEA3	Gain-of-function	Somatic	Overexpression	IE	Yes
P199	F	72	Bone	C41	9370	2018-06-12	21	IE,IE	m2C	NA	3	Combination	TMB	Composite biomarker	Somatic	Negative	IE	Yes
P199	F	72	Bone	C41	9370	2018-06-12	21	IE	m2C	NA	4	Single-agent	CD274	Gain-of-function	Somatic	Overexpression	IE	Yes
P199	F	72	Bone	C41	9370	2018-06-12	21	IE	m2C	NA	4	Single-agent	CTLA4	Gain-of-function	Somatic	Overexpression	IE	Yes
P199	F	72	Bone	C41	9370	2018-06-12	21	IE	m2C	NA	4	Single-agent	TMB	Composite biomarker	Somatic	Negative	IE	Yes
P200	M	37	Neuroendocrine and Adrenal	C80	8244	2015-01-09	51	NA	NA	NA	NA	NA	NA	NA	NA	NA	NA	Yes
P201	M	40	Leiomyosarcoma	C48	8890	2014-09-19	274	OTH	m3	IV-A	1	Single-agent	BRCA2	Loss-of-function	Somatic	Deletion	DDR	Yes
P201	M	40	Leiomyosarcoma	C48	8890	2014-09-19	274	OTH	m3	IV-A	1	Single-agent	ERCC2	Loss-of-function	Somatic	Deletion	DDR	Yes
P201	M	40	Leiomyosarcoma	C48	8890	2014-09-19	274	OTH	m3	IV-A	1	Single-agent	FANCF	Loss-of-function	Somatic	Deletion	DDR	Yes
P201	M	40	Leiomyosarcoma	C48	8890	2014-09-19	274	OTH	m3	IV-A	1	Single-agent	FANCG	Loss-of-function	Somatic	Deletion	DDR	Yes
P201	M	40	Leiomyosarcoma	C48	8890	2014-09-19	274	OTH	m3	IV-A	1	Single-agent	FANCG	Loss-of-function	Somatic	SNV/indel	DDR	Yes
P201	M	40	Leiomyosarcoma	C48	8890	2014-09-19	274	DDR	m3	IV-A	1	Single-agent	BRCA2	Loss-of-function	Somatic	Deletion	DDR	Yes
P201	M	40	Leiomyosarcoma	C48	8890	2014-09-19	274	DDR	m3	IV-A	1	Single-agent	FANCF	Loss-of-function	Somatic	Deletion	DDR	Yes
P201	M	40	Leiomyosarcoma	C48	8890	2014-09-19	274	DDR	m3	IV-A	1	Single-agent	FANCG	Loss-of-function	Somatic	Deletion	DDR	Yes
P201	M	40	Leiomyosarcoma	C48	8890	2014-09-19	274	DDR	m3	IV-A	1	Single-agent	FANCG	Loss-of-function	Somatic	SNV/indel	DDR	Yes
P201	M	40	Leiomyosarcoma	C48	8890	2014-09-19	274	RME	m2C	NA	2	Single-agent	ARAF	Gain-of-function	Somatic	Overexpression	RME	Yes
P201	M	40	Leiomyosarcoma	C48	8890	2014-09-19	274	RME	m2C	NA	2	Single-agent	ARAF	Gain-of-function	Somatic	Gain	RME	Yes
P202	M	55	Unknown Primary	C79	8140	2017-10-27	862	IE	m2B	III-A	1	Single-agent	CD274	Gain-of-function	Somatic	Overexpression	IE	Yes
P202	M	55	Unknown Primary	C79	8140	2017-10-27	862	IE	m2B	III-A	1	Single-agent	CTLA4	Gain-of-function	Somatic	Overexpression	IE	Yes
P202	M	55	Unknown Primary	C79	8140	2017-10-27	862	IE	m2B	III-A	1	Single-agent	PDCD1LG2	Gain-of-function	Somatic	Overexpression	IE	Yes
P202	M	55	Unknown Primary	C79	8140	2017-10-27	862	IE	m2B	III-A	1	Single-agent	TMB	Composite biomarker	Somatic	Positive	IE	Yes
P202	M	55	Unknown Primary	C79	8140	2017-10-27	862	OTH	m3	IV-A	2	Single-agent	STK11	Loss-of-function	Somatic	SNV/indel	PAM	Yes
P202	M	55	Unknown Primary	C79	8140	2017-10-27	862	DDR	m4	X	3	Single-agent	SBS8	Composite biomarker	Somatic	Mutational signature	DDR	Yes
P202	M	55	Unknown Primary	C79	8140	2017-10-27	862	TK	m3	IV-A	4	Single-agent	EGFR	Gain-of-function	Somatic	SNV/indel	TK	Yes
P202	M	55	Unknown Primary	C79	8140	2017-10-27	862	TK	m3	IV-A	4	Single-agent	FGFR4	Gain-of-function	Germline	Overexpression	TK	Yes
P202	M	55	Unknown Primary	C79	8140	2017-10-27	862	TK	m3	IV-A	4	Single-agent	FGFR4	Gain-of-function	Germline	SNV/indel	TK	Yes
P202	M	55	Unknown Primary	C79	8140	2017-10-27	862	IE	m2B	IV-A	5	Single-agent	CTAG1B	Gain-of-function	Somatic	Overexpression	IE	Yes
P202	M	55	Unknown Primary	C79	8140	2017-10-27	862	OTH	m2B	III-B	5	Single-agent	CLDN18	Gain-of-function	Somatic	Overexpression	IE	Yes
P203	F	36	Synovial Sarcoma	C49	9041	2017-09-15	33	IE	m1B	II-A	1	Single-agent	CTAG1B	Gain-of-function	Somatic	Overexpression	IE	Yes
P203	F	36	Synovial Sarcoma	C49	9041	2017-09-15	33	CC	m3	IV-A	2	Single-agent	CDK4	Gain-of-function	Somatic	Overexpression	CC	Yes
P203	F	36	Synovial Sarcoma	C49	9041	2017-09-15	33	CC	m3	IV-A	2	Single-agent	CDKN2A	Loss-of-function	Somatic	Underexpression	CC	Yes
P203	F	36	Synovial Sarcoma	C49	9041	2017-09-15	33	OTH	m3	IV-A	3	Single-agent	SS18	Loss-of-function	Somatic	Fusion	OTH	Yes
P203	F	36	Synovial Sarcoma	C49	9041	2017-09-15	33	OTH	m3	IV-A	3	Single-agent	SSX1	Loss-of-function	Somatic	Fusion	OTH	Yes
P204	M	37	Hematopoietic	C72	9680	2017-02-10	82	CC	m2C	NA	1	Single-agent	CDKN2A	Loss-of-function	Somatic	Deletion	CC	No
P204	M	37	Hematopoietic	C72	9680	2017-02-10	82	CC	m2C	NA	1	Single-agent	CDKN2B	Loss-of-function	Somatic	Deletion	CC	No
P204	M	37	Hematopoietic	C72	9680	2017-02-10	82	TK	m4	X	2	Single-agent	PIM1	Gain-of-function	Somatic	SNV/indel	OTH	No
P205	F	28	Neuroendocrine and Adrenal	C34	8249	2018-04-13	14	TK	m2B	III-A	1	Single-agent	FGFR3	Gain-of-function	Somatic	Overexpression	TK	Yes
P205	F	28	Neuroendocrine and Adrenal	C34	8249	2018-04-13	14	OTH,OTH	m2C	NA	2	Combination	ASCL1	Gain-of-function	Somatic	Overexpression	OTH	Yes
P205	F	28	Neuroendocrine and Adrenal	C34	8249	2018-04-13	14	OTH,OTH	m2C	NA	2	Combination	BCL2	Gain-of-function	Somatic	Overexpression	OTH	Yes
P205	F	28	Neuroendocrine and Adrenal	C34	8249	2018-04-13	14	OTH,OTH	m2C	NA	2	Combination	MYCL	Gain-of-function	Somatic	Overexpression	CC	Yes
P205	F	28	Neuroendocrine and Adrenal	C34	8249	2018-04-13	14	OTH,OTH	m2C	NA	2	Combination	MYCN	Gain-of-function	Somatic	Overexpression	OTH	Yes
P205	F	28	Neuroendocrine and Adrenal	C34	8249	2018-04-13	14	OTH	m2C	NA	3	Single-agent	ASCL1	Gain-of-function	Somatic	Overexpression	OTH	Yes
P205	F	28	Neuroendocrine and Adrenal	C34	8249	2018-04-13	14	OTH	m2C	NA	3	Single-agent	BCL2	Gain-of-function	Somatic	Overexpression	OTH	Yes
P205	F	28	Neuroendocrine and Adrenal	C34	8249	2018-04-13	14	OTH	m2C	NA	3	Single-agent	MYCL	Gain-of-function	Somatic	Overexpression	CC	Yes
P205	F	28	Neuroendocrine and Adrenal	C34	8249	2018-04-13	14	OTH	m2C	NA	3	Single-agent	MYCN	Gain-of-function	Somatic	Overexpression	OTH	Yes
P205	F	28	Neuroendocrine and Adrenal	C34	8249	2018-04-13	14	OTH	m3	IV-A	4	Single-agent	ASCL1	Gain-of-function	Somatic	Overexpression	OTH	Yes
P205	F	28	Neuroendocrine and Adrenal	C34	8249	2018-04-13	14	OTH	m3	IV-A	4	Single-agent	BCL2	Gain-of-function	Somatic	Overexpression	OTH	Yes
P205	F	28	Neuroendocrine and Adrenal	C34	8249	2018-04-13	14	OTH	m3	IV-A	4	Single-agent	MYCL	Gain-of-function	Somatic	Overexpression	CC	Yes
P205	F	28	Neuroendocrine and Adrenal	C34	8249	2018-04-13	14	OTH	m3	IV-A	4	Single-agent	MYCN	Gain-of-function	Somatic	Overexpression	OTH	Yes
P205	F	28	Neuroendocrine and Adrenal	C34	8249	2018-04-13	14	DDR,OTH	m2C	NA	5	Combination	BRCA2	Loss-of-function	Somatic	Underexpression	DDR	Yes
P205	F	28	Neuroendocrine and Adrenal	C34	8249	2018-04-13	14	DDR,OTH	m2C	NA	5	Combination	CHEK1	Loss-of-function	Somatic	Underexpression	DDR	Yes
P205	F	28	Neuroendocrine and Adrenal	C34	8249	2018-04-13	14	DDR,OTH	m2C	NA	5	Combination	FANCD2	Loss-of-function	Somatic	Deletion	DDR	Yes
P205	F	28	Neuroendocrine and Adrenal	C34	8249	2018-04-13	14	DDR,OTH	m2C	NA	5	Combination	HRD	Composite biomarker	Somatic	Negative	DDR	Yes
P205	F	28	Neuroendocrine and Adrenal	C34	8249	2018-04-13	14	DDR,OTH	m2C	NA	5	Combination	RAD51	Loss-of-function	Somatic	Underexpression	DDR	Yes
P205	F	28	Neuroendocrine and Adrenal	C34	8249	2018-04-13	14	DDR,OTH	m2C	NA	5	Combination	RAD51AP1	Loss-of-function	Somatic	Underexpression	DDR	Yes
P205	F	28	Neuroendocrine and Adrenal	C34	8249	2018-04-13	14	DDR,OTH	m2C	NA	5	Combination	SBS3	Composite biomarker	Somatic	Mutational signature	DDR	Yes
P205	F	28	Neuroendocrine and Adrenal	C34	8249	2018-04-13	14	DDR,OTH	m2C	NA	5	Combination	XRCC2	Loss-of-function	Somatic	Underexpression	DDR	Yes
P205	F	28	Neuroendocrine and Adrenal	C34	8249	2018-04-13	14	DDR	m2C	NA	6	Single-agent	BRCA2	Loss-of-function	Somatic	Underexpression	DDR	Yes
P205	F	28	Neuroendocrine and Adrenal	C34	8249	2018-04-13	14	DDR	m2C	NA	6	Single-agent	CHEK1	Loss-of-function	Somatic	Underexpression	DDR	Yes
P205	F	28	Neuroendocrine and Adrenal	C34	8249	2018-04-13	14	DDR	m2C	NA	6	Single-agent	FANCD2	Loss-of-function	Somatic	Deletion	DDR	Yes
P205	F	28	Neuroendocrine and Adrenal	C34	8249	2018-04-13	14	DDR	m2C	NA	6	Single-agent	RAD51	Loss-of-function	Somatic	Underexpression	DDR	Yes
P205	F	28	Neuroendocrine and Adrenal	C34	8249	2018-04-13	14	DDR	m2C	NA	6	Single-agent	RAD51AP1	Loss-of-function	Somatic	Underexpression	DDR	Yes
P205	F	28	Neuroendocrine and Adrenal	C34	8249	2018-04-13	14	DDR	m2C	NA	6	Single-agent	SBS3	Composite biomarker	Somatic	Mutational signature	DDR	Yes
P205	F	28	Neuroendocrine and Adrenal	C34	8249	2018-04-13	14	DDR	m2C	NA	6	Single-agent	XRCC2	Loss-of-function	Somatic	Underexpression	DDR	Yes
P206	M	47	Neuroendocrine and Adrenal	C25	8249	2014-05-09	53	CC	m3	IV-A	1	Single-agent	CDKN2A	Loss-of-function	Somatic	Deletion	CC	No
P206	M	47	Neuroendocrine and Adrenal	C25	8249	2014-05-09	53	CC	m3	IV-A	1	Single-agent	CDKN2B	Loss-of-function	Somatic	Deletion	CC	No
P207	M	31	Soft Tissue Other	C49	9581	2017-05-12	32	NA	NA	NA	NA	NA	NA	NA	NA	NA	NA	Yes
P208	F	47	Hepatopancreaticobiliary	C25	8560	2018-04-13	862	IE	m2A	II-A	1	Single-agent	MSH2	Loss-of-function	Germline	SNV/indel	DDR	Yes
P208	F	47	Hepatopancreaticobiliary	C25	8560	2018-04-13	862	IE	m2A	II-A	1	Single-agent	NRAS	Gain-of-function	Somatic	SNV/indel	RME	Yes
P208	F	47	Hepatopancreaticobiliary	C25	8560	2018-04-13	862	IE	m2A	II-A	1	Single-agent	TMB	Composite biomarker	Germline	Positive	IE	Yes
P208	F	47	Hepatopancreaticobiliary	C25	8560	2018-04-13	862	IE,RME	m2C	NA	2	Combination	MSH2	Loss-of-function	Germline	SNV/indel	DDR	Yes
P208	F	47	Hepatopancreaticobiliary	C25	8560	2018-04-13	862	IE,RME	m2C	NA	2	Combination	NRAS	Gain-of-function	Somatic	SNV/indel	RME	Yes
P208	F	47	Hepatopancreaticobiliary	C25	8560	2018-04-13	862	IE,RME	m2C	NA	2	Combination	TMB	Composite biomarker	Germline	Positive	IE	Yes
P208	F	47	Hepatopancreaticobiliary	C25	8560	2018-04-13	862	IE,DDR	m2B	III-B	3	Combination	ATM	Loss-of-function	Somatic	SNV/indel	DDR	Yes
P208	F	47	Hepatopancreaticobiliary	C25	8560	2018-04-13	862	IE,DDR	m2B	III-B	3	Combination	ATR	Loss-of-function	Somatic	SNV/indel	DDR	Yes
P208	F	47	Hepatopancreaticobiliary	C25	8560	2018-04-13	862	IE,DDR	m2B	III-B	3	Combination	MSH2	Loss-of-function	Germline	SNV/indel	DDR	Yes
P208	F	47	Hepatopancreaticobiliary	C25	8560	2018-04-13	862	IE,DDR	m2B	III-B	3	Combination	PTEN	Loss-of-function	Somatic	SNV/indel	PAM	Yes
P208	F	47	Hepatopancreaticobiliary	C25	8560	2018-04-13	862	IE,DDR	m2B	III-B	3	Combination	TMB	Composite biomarker	Germline	Positive	IE	Yes
P208	F	47	Hepatopancreaticobiliary	C25	8560	2018-04-13	862	PAM	m2B	III-B	4	Single-agent	PTEN	Loss-of-function	Somatic	SNV/indel	PAM	Yes
P208	F	47	Hepatopancreaticobiliary	C25	8560	2018-04-13	862	RME,TK	m3	IV-A	5	Combination	ERBB2	Gain-of-function	Somatic	SNV/indel	TK	Yes
P208	F	47	Hepatopancreaticobiliary	C25	8560	2018-04-13	862	RME,TK	m3	IV-A	5	Combination	ERBB3	Gain-of-function	Somatic	SNV/indel	TK	Yes
P208	F	47	Hepatopancreaticobiliary	C25	8560	2018-04-13	862	RME,TK	m3	IV-A	5	Combination	NRAS	Gain-of-function	Somatic	SNV/indel	RME	Yes
P208	F	47	Hepatopancreaticobiliary	C25	8560	2018-04-13	862	IE,RME	m3	IV-A	6	Combination	NRAS	Gain-of-function	Somatic	SNV/indel	RME	Yes
P208	F	47	Hepatopancreaticobiliary	C25	8560	2018-06-29	785	NA	NA	NA	NA	NA	NA	NA	NA	NA	NA	Yes
P209	M	42	Neuroendocrine and Adrenal	C18	8244	2018-10-12	1984	IE	m2B	I-C	1	Single-agent	ARID1A	Loss-of-function	Somatic	SNV/indel	OTH	Yes
P209	M	42	Neuroendocrine and Adrenal	C18	8244	2018-10-12	1984	IE	m2B	I-C	1	Single-agent	CTNNB1	Gain-of-function	Somatic	SNV/indel	DEV	Yes
P209	M	42	Neuroendocrine and Adrenal	C18	8244	2018-10-12	1984	IE	m2B	I-C	1	Single-agent	MLH1	Loss-of-function	Somatic	SNV/indel	DDR	Yes
P209	M	42	Neuroendocrine and Adrenal	C18	8244	2018-10-12	1984	IE	m2B	I-C	1	Single-agent	POLE	Loss-of-function	Somatic	SNV/indel	DDR	Yes
P209	M	42	Neuroendocrine and Adrenal	C18	8244	2018-10-12	1984	IE	m2B	I-C	1	Single-agent	STK11	Loss-of-function	Somatic	SNV/indel	PAM	Yes
P209	M	42	Neuroendocrine and Adrenal	C18	8244	2018-10-12	1984	IE	m2B	I-C	1	Single-agent	TMB	Composite biomarker	Somatic	Positive	IE	Yes
P209	M	42	Neuroendocrine and Adrenal	C18	8244	2018-10-12	1984	PAM	m2B	III-A	2	Single-agent	MTOR	Gain-of-function	Somatic	SNV/indel	PAM	Yes
P209	M	42	Neuroendocrine and Adrenal	C18	8244	2018-10-12	1984	PAM	m2B	III-A	2	Single-agent	STK11	Loss-of-function	Somatic	SNV/indel	PAM	Yes
P209	M	42	Neuroendocrine and Adrenal	C18	8244	2018-10-12	1984	CC	m2C	NA	3	Single-agent	CDKN2A	Loss-of-function	Somatic	Deletion	CC	Yes
P209	M	42	Neuroendocrine and Adrenal	C18	8244	2018-10-12	1984	CC	m2C	NA	3	Single-agent	CDKN2A	Loss-of-function	Somatic	SNV/indel	CC	Yes
P210	F	44	Hepatopancreaticobiliary	C22	8171	2016-05-06	84	NA	NA	NA	NA	NA	NA	NA	NA	NA	NA	Yes
P211	F	37	Liposarcoma	C49	8852	2018-06-19	24	PAM	m2C	NA	1	Single-agent	PIK3CA	Gain-of-function	Somatic	SNV/indel	PAM	No
P211	F	37	Liposarcoma	C49	8852	2018-06-19	24	PAM,OTH	m1B	II-A	1	Combination	DDIT3	Gain-of-function	Somatic	Fusion	OTH	No
P211	F	37	Liposarcoma	C49	8852	2018-06-19	24	PAM,OTH	m1B	II-A	1	Combination	FUS	Gain-of-function	Somatic	Fusion	OTH	No
P211	F	37	Liposarcoma	C49	8852	2018-06-19	24	PAM,OTH	m1B	II-A	1	Combination	PIK3CA	Gain-of-function	Somatic	SNV/indel	PAM	No
P211	F	37	Liposarcoma	C49	8852	2018-06-19	24	OTH	m1B	I-B	2	Single-agent	DDIT3	Gain-of-function	Somatic	Fusion	OTH	No
P211	F	37	Liposarcoma	C49	8852	2018-06-19	24	OTH	m1B	I-B	2	Single-agent	FUS	Gain-of-function	Somatic	Fusion	OTH	No
P211	F	37	Liposarcoma	C49	8852	2018-06-19	24	TK	m4	X	3	Single-agent	PIK3CA	Gain-of-function	Somatic	SNV/indel	PAM	No
P211	F	37	Liposarcoma	C49	8852	2018-06-19	24	PAM	m2B	III-A	4	Single-agent	PIK3CA	Gain-of-function	Somatic	SNV/indel	PAM	No
P211	F	37	Liposarcoma	C49	8852	2018-06-19	24	OTH	m2B	III-B	1	Single-agent	PIK3CA	Gain-of-function	Somatic	SNV/indel	PAM	No
P212	F	42	Hepatopancreaticobiliary	C25	8500	2015-04-24	38	NA	NA	NA	NA	NA	NA	NA	NA	NA	NA	Yes
P213	M	35	GIST	C17	8936	2017-06-16	202	TK	m3	IV-A	1	Single-agent	KIT	Gain-of-function	Somatic	SNV/indel	TK	Yes
P213	M	35	GIST	C17	8936	2017-06-16	202	TK	m3	III-B	2	Single-agent	KIT	Gain-of-function	Somatic	SNV/indel	TK	Yes
P213	M	35	GIST	C17	8936	2017-06-16	202	TK	m4	X	3	Single-agent	DDR2	Gain-of-function	Somatic	SNV/indel	TK	Yes
P214	M	39	Soft Tissue Other	C49	8801	2017-12-15	102	TK	m2C	NA	1	Single-agent	FGF1	Gain-of-function	Somatic	Overexpression	TK	Yes
P214	M	39	Soft Tissue Other	C49	8801	2017-12-15	102	TK	m2C	NA	1	Single-agent	FGFR1	Gain-of-function	Somatic	Fusion	TK	Yes
P214	M	39	Soft Tissue Other	C49	8801	2017-12-15	102	TK	m2C	NA	1	Single-agent	MYH11	Gain-of-function	Somatic	Fusion	NA	Yes
P214	M	39	Soft Tissue Other	C49	8801	2017-12-15	102	IE	m2B	III-A	2	Single-agent	NA	NA	NA	NA	NA	Yes
P214	M	39	Soft Tissue Other	C49	8801	2017-12-15	102	CC	m2C	NA	3	Single-agent	CDKN2A	Loss-of-function	Somatic	Deletion	CC	Yes
P214	M	39	Soft Tissue Other	C49	8801	2017-12-15	102	CC	m2C	NA	3	Single-agent	CDKN2A	Loss-of-function	Somatic	Underexpression	CC	Yes
P214	M	39	Soft Tissue Other	C49	8801	2017-12-15	102	CC	m2C	NA	3	Single-agent	CDKN2B	Loss-of-function	Somatic	Deletion	CC	Yes
P214	M	39	Soft Tissue Other	C49	8801	2017-12-15	102	CC	m2C	NA	3	Single-agent	CDKN2B	Loss-of-function	Somatic	Underexpression	CC	Yes
P215	F	39	Upper Gastrointestinal	C16	8490	2017-02-24	864	IE	m2B	III-A	1	Single-agent	CD274	Gain-of-function	Somatic	Overexpression	IE	Yes
P215	F	39	Upper Gastrointestinal	C16	8490	2017-02-24	864	IE	m2B	III-A	1	Single-agent	POLE	Loss-of-function	Somatic	SNV/indel	DDR	Yes
P215	F	39	Upper Gastrointestinal	C16	8490	2017-02-24	864	IE	m2B	III-A	1	Single-agent	TMB	Composite biomarker	Somatic	Positive	IE	Yes
P215	F	39	Upper Gastrointestinal	C16	8490	2017-02-24	864	OTH	m1B	III-A	2	Single-agent	CLDN18	Gain-of-function	Somatic	Overexpression	IE	Yes
P215	F	39	Upper Gastrointestinal	C16	8490	2017-02-24	864	DDR	m3	IV-A	3	Single-agent	ATR	Loss-of-function	Somatic	SNV/indel	DDR	Yes
P215	F	39	Upper Gastrointestinal	C16	8490	2017-02-24	864	DDR	m3	IV-A	3	Single-agent	ERCC5	Loss-of-function	Somatic	SNV/indel	DDR	Yes
P215	F	39	Upper Gastrointestinal	C16	8490	2017-02-24	864	DDR	m3	IV-A	3	Single-agent	FANCA	Loss-of-function	Somatic	SNV/indel	DDR	Yes
P215	F	39	Upper Gastrointestinal	C16	8490	2017-02-24	864	DDR	m3	IV-A	3	Single-agent	FANCI	Loss-of-function	Somatic	SNV/indel	DDR	Yes
P215	F	39	Upper Gastrointestinal	C16	8490	2017-02-24	864	DDR	m3	IV-A	3	Single-agent	MLH3	Loss-of-function	Somatic	SNV/indel	DDR	Yes
P215	F	39	Upper Gastrointestinal	C16	8490	2017-02-24	864	DDR	m3	IV-A	3	Single-agent	SBS6	Composite biomarker	NA	Mutational signature	NA	Yes
P216	F	37	Other	C49	8990	2016-12-16	3	TK	m2C	NA	1	Single-agent	FGF1	Gain-of-function	Somatic	Overexpression	TK	Yes
P216	F	37	Other	C49	8990	2016-12-16	3	TK	m2C	NA	1	Single-agent	FGF2	Gain-of-function	Somatic	Overexpression	TK	Yes
P217	M	40	Other	C44	8402	2014-09-19	2	PAM	m4	X	1	Single-agent	AKT1	Gain-of-function	Somatic	Gain	PAM	Yes
P218	M	56	Bone	C41	9371	2017-06-02	364	IE	m2B	III-A	1	Single-agent	MLH1	Loss-of-function	Somatic	Deletion	DDR	No
P218	M	56	Bone	C41	9371	2017-06-02	364	IE	m2B	III-A	1	Single-agent	MSH2	Loss-of-function	Somatic	SNV/indel	DDR	No
P218	M	56	Bone	C41	9371	2017-06-02	364	IE	m2B	III-A	1	Single-agent	MSH2	Loss-of-function	Somatic	Deletion	DDR	No
P218	M	56	Bone	C41	9371	2017-06-02	364	IE	m2B	III-A	1	Single-agent	SBS20	Composite biomarker	NA	Mutational signature	NA	No
P218	M	56	Bone	C41	9371	2017-06-02	364	IE	m2B	III-A	1	Single-agent	TMB	Composite biomarker	NA	Positive	IE	No
P218	M	56	Bone	C41	9371	2017-06-02	364	CC	m2C	NA	2	Single-agent	CDKN2A	Loss-of-function	Somatic	Deletion	CC	No
P218	M	56	Bone	C41	9371	2017-06-02	364	CC	m2C	NA	2	Single-agent	CDKN2B	Loss-of-function	Somatic	Deletion	CC	No
P218	M	56	Bone	C41	9371	2017-06-02	364	CC	m2C	NA	2	Single-agent	CDKN2C	Loss-of-function	Somatic	SNV/indel	CC	No
P218	M	56	Bone	C41	9371	2017-06-02	364	DDR	m2B	III-A	3	Single-agent	AGL	Loss-of-function	Somatic	Fusion	NA	No
P218	M	56	Bone	C41	9371	2017-06-02	364	DDR	m2B	III-A	3	Single-agent	ATM	Loss-of-function	Somatic	Deletion	DDR	No
P218	M	56	Bone	C41	9371	2017-06-02	364	DDR	m2B	III-A	3	Single-agent	BAP1	Loss-of-function	Somatic	Deletion	DDR	No
P218	M	56	Bone	C41	9371	2017-06-02	364	DDR	m2B	III-A	3	Single-agent	BRCA2	Loss-of-function	Somatic	Fusion	DDR	No
P218	M	56	Bone	C41	9371	2017-06-02	364	DDR	m2B	III-A	3	Single-agent	CHEK2	Loss-of-function	Somatic	Deletion	DDR	No
P218	M	56	Bone	C41	9371	2017-06-02	364	DDR	m2B	III-A	3	Single-agent	FANCC	Loss-of-function	Somatic	Deletion	DDR	No
P218	M	56	Bone	C41	9371	2017-06-02	364	DDR	m2B	III-A	3	Single-agent	FANCG	Loss-of-function	Somatic	Deletion	DDR	No
P218	M	56	Bone	C41	9371	2017-06-02	364	PAM	m2C	NA	4	Single-agent	TSC1	Loss-of-function	Somatic	Deletion	PAM	No
P219	F	28	Gynecologic	C56	8460	2018-08-10	15	RME,RME	m2B	III-A	1	Combination	KRAS	Gain-of-function	Somatic	Gain	RME	Yes
P219	F	28	Gynecologic	C56	8460	2018-08-10	15	RME,RME	m2B	III-A	1	Combination	NF2	Loss-of-function	Somatic	Deletion	PAM	Yes
P219	F	28	Gynecologic	C56	8460	2018-08-10	15	RME,RME	m2B	III-A	1	Combination	RAP1B	Gain-of-function	Somatic	Overexpression	RME	Yes
P219	F	28	Gynecologic	C56	8460	2018-08-10	15	PAM	m3	IV-A	2	Single-agent	KRAS	Gain-of-function	Somatic	Gain	RME	Yes
P219	F	28	Gynecologic	C56	8460	2018-08-10	15	PAM	m3	IV-A	3	Single-agent	KRAS	Gain-of-function	Somatic	Gain	RME	Yes
P220	M	68	Neuroendocrine and Adrenal	C17	8249	2018-05-15	37	RME	m2A	III-A	1	Single-agent	NRAS	Gain-of-function	Somatic	SNV/indel	RME	No
P220	M	68	Neuroendocrine and Adrenal	C17	8249	2018-05-15	37	TK	m2B	III-B	2	Single-agent	KDM5C	Gain-of-function	Somatic	SNV/indel	OTH	No
P220	M	68	Neuroendocrine and Adrenal	C17	8249	2018-05-15	37	RME	m3	IV-A	3	Single-agent	NRAS	Gain-of-function	Somatic	SNV/indel	RME	No
P220	M	68	Neuroendocrine and Adrenal	C17	8249	2018-05-15	37	RME	m3	IV-A	4	Single-agent	NRAS	Gain-of-function	Somatic	SNV/indel	RME	No
P220	M	68	Neuroendocrine and Adrenal	C17	8249	2018-05-15	37	OTH	m3	IV-A	5	Single-agent	BCOR	Loss-of-function	Somatic	SNV/indel	OTH	No
P221	M	78	Melanoma	C43	8742	2014-10-24	105	PAM	m4	X	1	Single-agent	PIK3CA	Gain-of-function	Somatic	SNV/indel	PAM	No
P221	M	78	Melanoma	C43	8742	2014-10-24	105	TK	m3	IV-A	2	Single-agent	MET	Gain-of-function	Somatic	Gain	TK	No
P222	F	41	Leiomyosarcoma	C49	8890	2018-02-16	2075	IE,DDR	m2A	II-B	1	Combination	MLH1	Loss-of-function	Germline	SNV/indel	DDR	Yes
P222	F	41	Leiomyosarcoma	C49	8890	2018-02-16	2075	IE,DDR	m2A	II-B	1	Combination	MSH6	Loss-of-function	Somatic	SNV/indel	DDR	Yes
P222	F	41	Leiomyosarcoma	C49	8890	2018-02-16	2075	IE,DDR	m2A	II-B	1	Combination	MSH6	Loss-of-function	Somatic	Deletion	DDR	Yes
P222	F	41	Leiomyosarcoma	C49	8890	2018-02-16	2075	IE,DDR	m2A	II-B	1	Combination	PDCD1LG2	Gain-of-function	Somatic	Overexpression	IE	Yes
P222	F	41	Leiomyosarcoma	C49	8890	2018-02-16	2075	IE,DDR	m2A	II-B	1	Combination	TMB	Composite biomarker	Germline	Positive	IE	Yes
P222	F	41	Leiomyosarcoma	C49	8890	2018-02-16	2075	DDR,OTH	m2B	III-A	2	Combination	RAD50	Loss-of-function	Somatic	SNV/indel	DDR	Yes
P222	F	41	Leiomyosarcoma	C49	8890	2018-02-16	2075	PAM	m2B	III-A	3	Single-agent	NF1	Loss-of-function	Somatic	SNV/indel	RME	Yes
P222	F	41	Leiomyosarcoma	C49	8890	2018-02-16	2075	PAM	m2B	III-A	3	Single-agent	RPTOR	Gain-of-function	Somatic	Overexpression	PAM	Yes
P222	F	41	Leiomyosarcoma	C49	8890	2018-02-16	2075	NA	NA	NA	NA	NA	MLH1	Loss-of-function	Germline	NA	DDR	Yes
P223	M	48	NSCLC	C34	8140	2015-05-15	71	TK	m1A	I-A	1	Single-agent	EGFR	Gain-of-function	Somatic	SNV/indel	TK	No
P223	M	48	NSCLC	C34	8140	2015-05-15	71	TK	m1A	I-A	1	Single-agent	EGFR	Gain-of-function	Somatic	Gain	TK	No
P223	M	48	NSCLC	C34	8140	2015-05-15	71	TK	m1A	I-A	1	Single-agent	MET	Gain-of-function	Somatic	Gain	TK	No
P223	M	48	Leiomyosarcoma	C34	8140	2015-05-15	29	TK	m2C	NA	1	Single-agent	ERRFI1	Loss-of-function	Somatic	Deletion	TK	No
P223	M	48	Leiomyosarcoma	C34	8140	2015-05-15	29	PAM	m2B	III-A	2	Single-agent	PTEN	Loss-of-function	Somatic	Deletion	PAM	No
P223	M	48	Leiomyosarcoma	C34	8140	2015-05-15	29	PAM	m2B	III-A	2	Single-agent	STK11	Loss-of-function	Somatic	Deletion	PAM	No
P224	F	33	Bone	C40	9240	2015-01-30	41	TK	m4	X	2	Single-agent	JAK2	Gain-of-function	Somatic	Gain	TK	Yes
P224	F	33	Bone	C40	9240	2015-01-30	41	DEV	m4	X	3	Single-agent	CD274	Gain-of-function	Somatic	Gain	IE	Yes
P224	F	33	Bone	C40	9240	2015-01-30	41	IE	m2B	III-B	1	Single-agent	GLI1	Gain-of-function	Somatic	Overexpression	DEV	Yes
P224	F	33	Bone	C40	9240	2015-01-30	41	IE	m2B	III-B	1	Single-agent	GLI2	Gain-of-function	Somatic	Overexpression	DEV	Yes
P224	F	33	Bone	C40	9240	2015-01-30	41	IE	m2B	III-B	1	Single-agent	NOTCH1	Gain-of-function	Somatic	Overexpression	DEV	Yes
P224	F	33	Bone	C40	9240	2015-01-30	41	IE	m2B	III-B	1	Single-agent	PTCH1	Loss-of-function	Somatic	Overexpression	DEV	Yes
P224	F	33	Bone	C40	9240	2015-01-30	41	IE	m2B	III-B	1	Single-agent	PTCH2	Loss-of-function	Somatic	Overexpression	DEV	Yes
P224	F	33	Bone	C40	9240	2015-01-30	41	IE	m2B	III-B	1	Single-agent	SHH	Gain-of-function	Somatic	Overexpression	DEV	Yes
P225	M	52	Hepatopancreaticobiliary	C25	8480	2018-03-27	39	RME	m3	IV-A	1	Single-agent	KRAS	Gain-of-function	Somatic	SNV/indel	RME	Yes
P225	M	52	Hepatopancreaticobiliary	C25	8480	2018-03-27	39	RME	m3	IV-A	2	Single-agent	KRAS	Gain-of-function	Somatic	SNV/indel	RME	Yes
P225	M	52	Hepatopancreaticobiliary	C25	8480	2018-03-27	39	CC	m2C	NA	3	Single-agent	CDKN2A	Loss-of-function	Somatic	SNV/indel	CC	Yes
P225	M	52	Hepatopancreaticobiliary	C25	8480	2018-03-27	39	CC	m2C	NA	3	Single-agent	KRAS	Gain-of-function	Somatic	SNV/indel	RME	Yes
P225	M	52	Hepatopancreaticobiliary	C25	8480	2018-03-27	39	DEV	m3	IV-A	4	Single-agent	SHH	Gain-of-function	Somatic	Overexpression	DEV	Yes
P225	M	52	Hepatopancreaticobiliary	C25	8480	2018-03-27	39	DEV	m3	IV-A	4	Single-agent	STK36	Loss-of-function	Somatic	SNV/indel	DEV	Yes
P225	M	52	Hepatopancreaticobiliary	C25	8480	2018-03-27	39	NA	NA	NA	NA	NA	WT1	Loss-of-function	Germline	NA	DEV	Yes
P226	F	59	Neuroendocrine and Adrenal	C53	8013	2017-02-17	147	IE	m2B	I-C	1	Single-agent	TMB	Composite biomarker	Somatic	Positive	IE	No
P226	F	59	Neuroendocrine and Adrenal	C53	8013	2017-02-17	147	DDR	m3	IV-A	2	Single-agent	ATM	Loss-of-function	Somatic	SNV/indel	DDR	No
P226	F	59	Neuroendocrine and Adrenal	C53	8013	2017-02-17	147	DDR	m3	IV-A	2	Single-agent	SBS8	Composite biomarker	Somatic	Mutational signature	DDR	No
P227	F	55	Gynecologic	C56	8620	2016-03-18	26	OTH	m2C	NA	1	Single-agent	FOXL2	Gain-of-function	Somatic	SNV/indel	DEV	Yes
P227	F	55	Gynecologic	C56	8620	2016-03-18	26	RME	m4	X	2	Single-agent	MAP2K1	Gain-of-function	Somatic	Overexpression	RME	Yes
P227	F	55	Gynecologic	C56	8620	2016-03-18	26	RME	m4	X	2	Single-agent	NF2	Loss-of-function	Somatic	Deletion	PAM	Yes
P227	F	55	Gynecologic	C56	8620	2016-03-18	26	RME	m4	X	2	Single-agent	RASGRF1	Gain-of-function	Somatic	SNV/indel	NA	Yes
P228	M	37	Colorectal	C18	8140	2017-09-01	49	RME,RME	m2B	III-A	1	Combination	BRAF	Gain-of-function	Somatic	SNV/indel	RME	Yes
P228	M	37	Colorectal	C18	8140	2017-09-01	49	RME,TK	m2C	NA	2	Combination	NF1	Loss-of-function	Somatic	Underexpression	RME	Yes
P228	M	37	Colorectal	C18	8140	2017-09-01	49	RME,TK	m2C	NA	2	Combination	NF1	Loss-of-function	Somatic	Deletion	RME	Yes
P228	M	37	Colorectal	C18	8140	2017-09-01	49	TK	m4	IV-A	3	Single-agent	FGF3	Gain-of-function	Somatic	Overexpression	TK	Yes
P228	M	37	Colorectal	C18	8140	2017-09-01	49	IE	m2C	NA	4	Single-agent	CTAG1B	Gain-of-function	Somatic	Overexpression	IE	Yes
P229	M	66	GIST	C26	8936	2018-06-22	30	TK	m3	IV-A	1	Single-agent	KIT	Gain-of-function	Somatic	SNV/indel	TK	No
P229	M	66	GIST	C26	8936	2018-06-22	30	TK	m3	IV-A	2	Single-agent	KIT	Gain-of-function	Somatic	SNV/indel	TK	No
P229	M	66	GIST	C26	8936	2018-06-22	30	DDR,OTH	m2C	NA	2	Combination	BRCA2	Loss-of-function	Somatic	Deletion	DDR	No
P229	M	66	GIST	C26	8936	2018-06-22	30	DDR,OTH	m2C	NA	2	Combination	CHEK2	Loss-of-function	Somatic	Deletion	DDR	No
P229	M	66	GIST	C26	8936	2018-06-22	30	DDR,OTH	m2C	NA	2	Combination	FANCC	Loss-of-function	Somatic	Deletion	DDR	No
P229	M	66	GIST	C26	8936	2018-06-22	30	DDR,OTH	m2C	NA	2	Combination	MLH3	Loss-of-function	Somatic	Deletion	DDR	No
P229	M	66	GIST	C26	8936	2018-06-22	30	DDR,OTH	m2C	NA	2	Combination	RAD51	Loss-of-function	Somatic	Deletion	DDR	No
P229	M	66	GIST	C26	8936	2018-06-22	30	DDR,OTH	m2C	NA	2	Combination	RAD51B	Loss-of-function	Somatic	Deletion	DDR	No
P229	M	66	GIST	C26	8936	2018-06-22	30	DDR,OTH	m2C	NA	2	Combination	SBS3	Composite biomarker	Somatic	Mutational signature	DDR	No
P230	F	26	Soft Tissue Other	C49	9044	2017-05-05	21	TK	m3	IV-A	1	Single-agent	HGF	Gain-of-function	Somatic	Overexpression	TK	Yes
P230	F	26	Soft Tissue Other	C49	9044	2017-05-05	21	TK	m3	IV-A	1	Single-agent	MERTK	Gain-of-function	Somatic	Overexpression	TK	Yes
P230	F	26	Soft Tissue Other	C49	9044	2017-05-05	21	TK	m3	IV-A	1	Single-agent	MET	Gain-of-function	Somatic	Overexpression	TK	Yes
P230	F	26	Soft Tissue Other	C49	9044	2017-05-05	21	TK	m3	IV-A	2	Single-agent	NA	NA	NA	NA	NA	Yes
P230	F	26	Soft Tissue Other	C49	9044	2017-05-05	21	CC	m3	IV-A	3	Single-agent	CDKN2A	Loss-of-function	Somatic	Deletion	CC	Yes
P230	F	26	Soft Tissue Other	C49	9044	2017-05-05	21	CC	m3	IV-A	3	Single-agent	CDKN2A	Loss-of-function	Somatic	Underexpression	CC	Yes
P230	F	26	Soft Tissue Other	C49	9044	2017-05-05	21	CC	m3	IV-A	3	Single-agent	CDKN2B	Loss-of-function	Somatic	Deletion	CC	Yes
P230	F	26	Soft Tissue Other	C49	9044	2017-05-05	21	CC	m3	IV-A	3	Single-agent	CDKN2B	Loss-of-function	Somatic	Underexpression	CC	Yes
P231	M	82	Soft Tissue Other	C49	8714	2017-03-17	47	DDR	m2B	III-A	1	Single-agent	BRCA2	Loss-of-function	Somatic	Deletion	DDR	Yes
P231	M	82	Soft Tissue Other	C49	8714	2017-03-17	47	DDR	m2B	III-A	1	Single-agent	FANCA	Loss-of-function	Somatic	Deletion	DDR	Yes
P231	M	82	Soft Tissue Other	C49	8714	2017-03-17	47	DDR	m2B	III-A	1	Single-agent	FANCF	Loss-of-function	Somatic	Deletion	DDR	Yes
P231	M	82	Soft Tissue Other	C49	8714	2017-03-17	47	DDR	m2B	III-A	1	Single-agent	RAD50	Loss-of-function	Somatic	Deletion	DDR	Yes
P231	M	82	Soft Tissue Other	C49	8714	2017-03-17	47	DDR	m2B	III-A	1	Single-agent	RAD51B	Loss-of-function	Somatic	Deletion	DDR	Yes
P231	M	82	Soft Tissue Other	C49	8714	2017-03-17	47	DDR	m2B	III-A	1	Single-agent	SBS3	Composite biomarker	Somatic	Mutational signature	DDR	Yes
P232	F	34	Hepatopancreaticobiliary	C22	8260	2018-09-19	63	TK	m1B	II-A	1	Single-agent	FGFR1	Gain-of-function	Somatic	Gain	TK	Yes
P232	F	34	Hepatopancreaticobiliary	C22	8260	2018-09-19	63	TK	m1B	II-A	1	Single-agent	FGFR1	Gain-of-function	Somatic	Overexpression	TK	Yes
P232	F	34	Hepatopancreaticobiliary	C22	8260	2018-09-19	63	TK	m1B	II-A	1	Single-agent	FGFR2	Gain-of-function	Somatic	Fusion	TK	Yes
P232	F	34	Hepatopancreaticobiliary	C22	8260	2018-09-19	63	TK	m1B	II-A	1	Single-agent	FGFR4	Gain-of-function	Somatic	Overexpression	TK	Yes
P232	F	34	Hepatopancreaticobiliary	C22	8260	2018-09-19	63	TK	m1B	II-A	1	Single-agent	FGFR4	Gain-of-function	Somatic	Gain	TK	Yes
P232	F	34	Hepatopancreaticobiliary	C22	8260	2018-09-19	63	TK	m1B	II-A	1	Single-agent	NRAP	Gain-of-function	Somatic	Fusion	NA	Yes
P232	F	34	Hepatopancreaticobiliary	C22	8260	2018-09-19	63	TK	m1B	II-A	2	Single-agent	FGFR1	Gain-of-function	Somatic	Overexpression	TK	Yes
P232	F	34	Hepatopancreaticobiliary	C22	8260	2018-09-19	63	TK	m1B	II-A	2	Single-agent	FGFR1	Gain-of-function	Somatic	Gain	TK	Yes
P232	F	34	Hepatopancreaticobiliary	C22	8260	2018-09-19	63	TK	m1B	II-A	2	Single-agent	FGFR2	Gain-of-function	Somatic	Fusion	TK	Yes
P232	F	34	Hepatopancreaticobiliary	C22	8260	2018-09-19	63	TK	m1B	II-A	2	Single-agent	FGFR4	Gain-of-function	Somatic	Overexpression	TK	Yes
P232	F	34	Hepatopancreaticobiliary	C22	8260	2018-09-19	63	TK	m1B	II-A	2	Single-agent	FGFR4	Gain-of-function	Somatic	Gain	TK	Yes
P232	F	34	Hepatopancreaticobiliary	C22	8260	2018-09-19	63	TK	m1B	II-A	2	Single-agent	NRAP	Gain-of-function	Somatic	Fusion	NA	Yes
P232	F	34	Hepatopancreaticobiliary	C22	8260	2018-09-19	63	DDR,OTH	m2B	III-A	3	Combination	BAP1	Loss-of-function	Somatic	SNV/indel	DDR	Yes
P232	F	34	Hepatopancreaticobiliary	C22	8260	2018-09-19	63	DDR,OTH	m2B	III-A	3	Combination	BAP1	Loss-of-function	Somatic	Deletion	DDR	Yes
P232	F	34	Hepatopancreaticobiliary	C22	8260	2018-09-19	63	DDR,OTH	m2B	III-A	3	Combination	BRCA2	Loss-of-function	Somatic	Underexpression	DDR	Yes
P232	F	34	Hepatopancreaticobiliary	C22	8260	2018-09-19	63	DDR,OTH	m2B	III-A	3	Combination	BRCA2	Loss-of-function	Somatic	Deletion	DDR	Yes
P232	F	34	Hepatopancreaticobiliary	C22	8260	2018-09-19	63	DDR,OTH	m2B	III-A	3	Combination	FANCD2	Loss-of-function	Somatic	Underexpression	DDR	Yes
P232	F	34	Hepatopancreaticobiliary	C22	8260	2018-09-19	63	DDR,OTH	m2B	III-A	3	Combination	FANCD2	Loss-of-function	Somatic	Deletion	DDR	Yes
P232	F	34	Hepatopancreaticobiliary	C22	8260	2018-09-19	63	DDR,OTH	m2B	III-A	3	Combination	FANCE	Loss-of-function	Somatic	Underexpression	DDR	Yes
P232	F	34	Hepatopancreaticobiliary	C22	8260	2018-09-19	63	DDR,OTH	m2B	III-A	3	Combination	HRD	Composite biomarker	Somatic	Positive	DDR	Yes
P232	F	34	Hepatopancreaticobiliary	C22	8260	2018-09-19	63	DDR,OTH	m2B	III-A	3	Combination	RAD51B	Loss-of-function	Somatic	Underexpression	DDR	Yes
P232	F	34	Hepatopancreaticobiliary	C22	8260	2018-09-19	63	DDR,OTH	m2B	III-A	3	Combination	SBS3	Composite biomarker	Somatic	Mutational signature	DDR	Yes
P232	F	34	Hepatopancreaticobiliary	C22	8260	2018-09-19	63	DDR,OTH	m2B	III-A	3	Combination	XRCC3	Loss-of-function	Somatic	Underexpression	DDR	Yes
P232	F	34	Hepatopancreaticobiliary	C22	8260	2018-09-19	63	TK	m3	IV-A	4	Single-agent	ARID1A	Loss-of-function	Somatic	Underexpression	OTH	Yes
P232	F	34	Hepatopancreaticobiliary	C22	8260	2018-09-19	63	TK	m3	IV-A	4	Single-agent	ARID1A	Loss-of-function	Somatic	Deletion	OTH	Yes
P232	F	34	Hepatopancreaticobiliary	C22	8260	2018-09-19	63	OTH	m3	IV-A	5	Single-agent	ARID1A	Loss-of-function	Somatic	Underexpression	OTH	Yes
P232	F	34	Hepatopancreaticobiliary	C22	8260	2018-09-19	63	OTH	m3	IV-A	5	Single-agent	ARID1A	Loss-of-function	Somatic	Deletion	OTH	Yes
P233	M	37	GIST	C17	8936	2017-07-07	20	TK	m3	III-B	2	Single-agent	KIT	Gain-of-function	Somatic	SNV/indel	TK	Yes
P233	M	37	GIST	C17	8936	2017-07-07	20	TK	m2A	II-A	1	Single-agent	KIT	Gain-of-function	Somatic	SNV/indel	TK	Yes
P233	M	37	GIST	C17	8936	2017-07-07	20	TK	m3	IV-A	3	Single-agent	KIT	Gain-of-function	Somatic	SNV/indel	TK	Yes
P234	F	51	Neuroendocrine and Adrenal	C19	8246	2016-11-04	53	CC	m3	IV-A	1	Single-agent	CCNE1	Gain-of-function	Somatic	Gain	CC	Yes
P234	F	51	Neuroendocrine and Adrenal	C19	8246	2016-11-04	53	CC	m3	IV-A	1	Single-agent	CCNE1	Gain-of-function	Somatic	Overexpression	CC	Yes
P234	F	51	Neuroendocrine and Adrenal	C19	8246	2016-11-04	53	TK	m4	IV-B	2	Single-agent	FGF3	Gain-of-function	Somatic	Overexpression	TK	Yes
P234	F	51	Neuroendocrine and Adrenal	C19	8246	2016-11-04	53	TK	m4	IV-B	2	Single-agent	FGF4	Gain-of-function	Somatic	Overexpression	TK	Yes
P234	F	51	Neuroendocrine and Adrenal	C19	8246	2016-11-04	53	TK	m4	IV-B	2	Single-agent	FGFR3	Gain-of-function	Somatic	Overexpression	TK	Yes
P234	F	51	Neuroendocrine and Adrenal	C19	8246	2016-11-04	53	TK	m4	IV-B	2	Single-agent	FGFR4	Gain-of-function	Somatic	Overexpression	TK	Yes
P235	F	24	Other	C21	8070	2017-07-28	52	DDR	m2B	III-A	2	Single-agent	BRCA2	Loss-of-function	Somatic	Deletion	DDR	No
P235	F	24	Other	C21	8070	2017-07-28	52	DDR	m2B	III-A	2	Single-agent	CHEK1	Loss-of-function	Somatic	Deletion	DDR	No
P235	F	24	Other	C21	8070	2017-07-28	52	DDR	m2B	III-A	2	Single-agent	RAD50	Loss-of-function	Somatic	SNV/indel	DDR	No
P235	F	24	Other	C21	8070	2017-07-28	52	DDR	m2B	III-A	2	Single-agent	SBS3	Composite biomarker	Somatic	Mutational signature	DDR	No
P235	F	24	Other	C21	8070	2017-07-28	52	DEV	m4	X	1	Single-agent	PTCH1	Loss-of-function	Somatic	SNV/indel	DEV	No
P235	F	24	Other	C21	8070	2017-07-28	52	DEV	m4	X	1	Single-agent	YAP1	Gain-of-function	Somatic	Gain	OTH	No
P236	F	55	Hepatopancreaticobiliary	C22	8160	2014-07-18	48	TK	m4	X	1	Single-agent	FGFR2	Gain-of-function	Somatic	Overexpression	TK	Yes
P236	F	55	Hepatopancreaticobiliary	C22	8160	2014-07-18	48	TK	m4	X	1	Single-agent	FGFR4	Gain-of-function	Somatic	Overexpression	TK	Yes
P236	F	55	Hepatopancreaticobiliary	C22	8160	2014-07-18	48	TK	m4	X	1	Single-agent	FLT1	Gain-of-function	Somatic	Overexpression	TK	Yes
P237	M	73	Other	C71	9440	2015-06-19	49	NA	NA	NA	NA	NA	NA	NA	NA	NA	NA	Yes
P238	F	44	Other	C77	8010	2016-10-28	21	TK	m2C	NA	1	Single-agent	FGF3	Gain-of-function	Somatic	Overexpression	TK	Yes
P238	F	44	Other	C77	8010	2016-10-28	21	TK	m2C	NA	1	Single-agent	FGF3	Gain-of-function	Somatic	Gain	TK	Yes
P238	F	44	Other	C77	8010	2016-10-28	21	TK	m2C	NA	1	Single-agent	FGFR2	Gain-of-function	Somatic	Overexpression	TK	Yes
P238	F	44	Other	C77	8010	2016-10-28	21	DEV	m4	X	2	Single-agent	FAM120A	Gain-of-function	Somatic	Fusion	NA	Yes
P238	F	44	Other	C77	8010	2016-10-28	21	DEV	m4	X	2	Single-agent	FAM120A	Gain-of-function	Somatic	Overexpression	NA	Yes
P238	F	44	Other	C77	8010	2016-10-28	21	DEV	m4	X	2	Single-agent	NOTCH1	Gain-of-function	Somatic	Overexpression	DEV	Yes
P238	F	44	Other	C77	8010	2016-10-28	21	DEV	m4	X	2	Single-agent	NOTCH2	Gain-of-function	Somatic	Fusion	DEV	Yes
P238	F	44	Other	C77	8010	2016-10-28	21	DEV	m4	X	2	Single-agent	NOTCH2	Gain-of-function	Somatic	Overexpression	DEV	Yes
P238	F	44	Other	C77	8010	2016-10-28	21	path	NA	NA	NA	NA	NA	NA	NA	NA	NA	Yes
P239	M	64	Bone	C48	9220	2017-08-04	38	NA	NA	NA	NA	NA	NA	NA	NA	NA	NA	No
P240	F	51	Other	C44	9125	2018-07-13	5	RME	m2C	NA	1	Single-agent	MAP2K1	Gain-of-function	Somatic	SNV/indel	RME	Yes
P240	F	51	Other	C44	9125	2018-07-13	5	PAM	m2B	II-B	2	Single-agent	TSC2	Loss-of-function	Germline	SNV/indel	PAM	Yes
P240	F	51	Other	C44	9125	2018-07-13	5	TK	m2C	NA	3	Single-agent	FGFR3	Gain-of-function	Somatic	Overexpression	TK	Yes
P240	F	51	Other	C44	9125	2018-07-13	5	TK	m2C	NA	3	Single-agent	PDGFRB	Gain-of-function	Somatic	Overexpression	TK	Yes
P241	F	59	Hepatopancreaticobiliary	C79	8140	2017-10-13	28	TK	m3	IV-A	1	Single-agent	BICC1	Gain-of-function	Somatic	Overexpression	NA	Yes
P241	F	59	Hepatopancreaticobiliary	C79	8140	2017-10-13	28	TK	m3	IV-A	1	Single-agent	BICC1	Gain-of-function	Somatic	Fusion	NA	Yes
P241	F	59	Hepatopancreaticobiliary	C79	8140	2017-10-13	28	TK	m3	IV-A	1	Single-agent	FGFR1	Gain-of-function	Somatic	Overexpression	TK	Yes
P241	F	59	Hepatopancreaticobiliary	C79	8140	2017-10-13	28	TK	m3	IV-A	1	Single-agent	FGFR2	Gain-of-function	Somatic	Overexpression	TK	Yes
P241	F	59	Hepatopancreaticobiliary	C79	8140	2017-10-13	28	TK	m3	IV-A	1	Single-agent	FGFR2	Gain-of-function	Somatic	Fusion	TK	Yes
P241	F	59	Hepatopancreaticobiliary	C79	8140	2017-10-13	28	TK	m3	IV-A	1	Single-agent	FGFR3	Gain-of-function	Somatic	Overexpression	TK	Yes
P241	F	59	Hepatopancreaticobiliary	C79	8140	2017-10-13	28	TK	m3	IV-A	1	Single-agent	FGFR4	Gain-of-function	Somatic	Overexpression	TK	Yes
P241	F	59	Hepatopancreaticobiliary	C79	8140	2017-10-13	28	TK	m3	IV-A	1	Single-agent	FGFR4	Gain-of-function	Somatic	Gain	TK	Yes
P241	F	59	Hepatopancreaticobiliary	C79	8140	2017-10-13	28	RME	m4	X	2	Single-agent	ARAF	Gain-of-function	Somatic	Overexpression	RME	Yes
P241	F	59	Hepatopancreaticobiliary	C79	8140	2017-10-13	28	DDR	m3	IV-A	3	Single-agent	BAP1	Loss-of-function	Somatic	SNV/indel	DDR	Yes
P241	F	59	Hepatopancreaticobiliary	C79	8140	2017-10-13	28	path	NA	NA	NA	NA	NA	NA	NA	NA	NA	Yes
P242	M	41	Upper Gastrointestinal	C16	8490	2018-03-09	97	OTH	m2B	I-B	1	Single-agent	CLDN18	Gain-of-function	Somatic	Overexpression	IE	Yes
P242	M	41	Upper Gastrointestinal	C16	8490	2018-03-09	97	TK	m2C	NA	2	Single-agent	MET	Gain-of-function	Somatic	Gain	TK	Yes
P242	M	41	Upper Gastrointestinal	C16	8490	2018-03-09	97	TK	m2C	NA	2	Single-agent	MET	Gain-of-function	Somatic	Overexpression	TK	Yes
P242	M	41	Upper Gastrointestinal	C16	8490	2018-03-09	97	DDR,OTH	m4	X	3	Combination	ATM	Loss-of-function	Somatic	Underexpression	DDR	Yes
P242	M	41	Upper Gastrointestinal	C16	8490	2018-03-09	97	DDR,OTH	m4	X	3	Combination	ERCC4	Loss-of-function	Germline	Overexpression	DDR	Yes
P242	M	41	Upper Gastrointestinal	C16	8490	2018-03-09	97	DDR,OTH	m4	X	3	Combination	ERCC4	Loss-of-function	Germline	Gain	DDR	Yes
P242	M	41	Upper Gastrointestinal	C16	8490	2018-03-09	97	DDR,OTH	m4	X	3	Combination	ERCC4	Loss-of-function	Germline	SNV/indel	DDR	Yes
P242	M	41	Upper Gastrointestinal	C16	8490	2018-03-09	97	IE,DDR	m2B	III-A	4	Combination	MDM2	Gain-of-function	Somatic	Gain	CC	Yes
P242	M	41	Upper Gastrointestinal	C16	8490	2018-03-09	97	IE,TK	m2C	NA	5	Combination	MDM2	Gain-of-function	Somatic	Gain	CC	Yes
P242	M	41	Upper Gastrointestinal	C16	8490	2018-03-09	97	IE	m2B	III-A	6	Single-agent	MDM2	Gain-of-function	Somatic	Gain	CC	Yes
P242	M	41	Upper Gastrointestinal	C16	8490	2018-03-09	97	NA	NA	NA	NA	NA	XPA	Loss-of-function	Germline	NA	OTH	Yes
P243	F	58	Soft Tissue Other	C55	8805	2017-07-14	52	DDR,OTH	m3	IV-A	1	Combination	FANCF	Loss-of-function	Somatic	Deletion	DDR	Yes
P243	F	58	Soft Tissue Other	C55	8805	2017-07-14	52	DDR,OTH	m3	IV-A	1	Combination	NBN	Loss-of-function	Somatic	Deletion	DDR	Yes
P243	F	58	Soft Tissue Other	C55	8805	2017-07-14	52	DDR,OTH	m3	IV-A	1	Combination	SBS3	Composite biomarker	Somatic	Mutational signature	DDR	Yes
P244	M	38	Other	C70	9530	2016-06-10	43	OTH	m4	X	1	Single-agent	CDC73	Gain-of-function	Somatic	SNV/indel	CC	No
P244	M	38	Other	C70	9530	2016-06-10	43	OTH	m4	X	1	Single-agent	CDKN2C	Loss-of-function	Somatic	Deletion	CC	No
P244	M	38	Other	C70	9530	2016-06-10	43	CC	m4	X	1	Single-agent	CDC73	Gain-of-function	Somatic	SNV/indel	CC	No
P244	M	38	Other	C70	9530	2016-06-10	43	CC	m4	X	1	Single-agent	CDKN2C	Loss-of-function	Somatic	Deletion	CC	No
P244	M	38	Other	C70	9530	2016-06-10	43	PAM	m3	IV-A	2	Single-agent	NF2	Loss-of-function	Somatic	SNV/indel	PAM	No
P245	M	55	Neuroendocrine and Adrenal	C17	8249	2016-09-09	34	DDR	m2B	IV-A	1	Single-agent	BRCA1	Loss-of-function	Somatic	Underexpression	DDR	Yes
P245	M	55	Neuroendocrine and Adrenal	C17	8249	2016-09-09	34	DDR	m2B	IV-A	1	Single-agent	BRCA2	Loss-of-function	Somatic	Deletion	DDR	Yes
P245	M	55	Neuroendocrine and Adrenal	C17	8249	2016-09-09	34	DDR	m2B	IV-A	1	Single-agent	BRCA2	Loss-of-function	Somatic	Underexpression	DDR	Yes
P245	M	55	Neuroendocrine and Adrenal	C17	8249	2016-09-09	34	DDR	m2B	IV-A	1	Single-agent	BRIP1	Loss-of-function	Somatic	Underexpression	DDR	Yes
P245	M	55	Neuroendocrine and Adrenal	C17	8249	2016-09-09	34	DDR	m2B	IV-A	1	Single-agent	CHEK2	Loss-of-function	Somatic	Deletion	DDR	Yes
P245	M	55	Neuroendocrine and Adrenal	C17	8249	2016-09-09	34	DDR	m2B	IV-A	1	Single-agent	CHEK2	Loss-of-function	Somatic	Underexpression	DDR	Yes
P245	M	55	Neuroendocrine and Adrenal	C17	8249	2016-09-09	34	DDR	m2B	IV-A	1	Single-agent	FANCD2	Loss-of-function	Somatic	Underexpression	DDR	Yes
P245	M	55	Neuroendocrine and Adrenal	C17	8249	2016-09-09	34	DDR	m2B	IV-A	1	Single-agent	RAD51	Loss-of-function	Somatic	Underexpression	DDR	Yes
P245	M	55	Neuroendocrine and Adrenal	C17	8249	2016-09-09	34	DDR	m2B	IV-A	1	Single-agent	XRCC2	Loss-of-function	Somatic	Underexpression	DDR	Yes
P245	M	55	Neuroendocrine and Adrenal	C17	8249	2016-09-09	34	TK	m2B	III-A	2	Single-agent	FGFR3	Gain-of-function	Somatic	Gain	TK	Yes
P245	M	55	Neuroendocrine and Adrenal	C17	8249	2016-09-09	34	TK	m2B	III-A	2	Single-agent	FGFR3	Gain-of-function	Somatic	Overexpression	TK	Yes
P246	M	24	Soft Tissue Other	C49	8800	2018-01-05	19	TK	m2C	NA	1	Single-agent	KDR	Gain-of-function	Somatic	SNV/indel	TK	Yes
P246	M	24	Soft Tissue Other	C49	8800	2018-01-05	19	TK	m2C	NA	1	Single-agent	KDR	Gain-of-function	Somatic	Gain	TK	Yes
P246	M	24	Soft Tissue Other	C49	8800	2018-01-05	19	DDR	m3	IV-A	2	Single-agent	ATM	Loss-of-function	Germline	SNV/indel	DDR	Yes
P246	M	24	Soft Tissue Other	C49	8800	2018-01-05	19	path	NA	NA	NA	NA	NA	NA	NA	NA	NA	Yes
P247	M	53	Urologic	C64	8318	2018-03-23	48	IE	m2B	III-A	1	Single-agent	PBRM1	Loss-of-function	Somatic	SNV/indel	OTH	No
P247	M	53	Urologic	C64	8318	2018-03-23	48	IE	m2B	III-A	1	Single-agent	VHL	Loss-of-function	Somatic	SNV/indel	PAM	No
P247	M	53	Urologic	C64	8318	2018-03-23	48	OTH	m3	IV-A	2	Single-agent	VHL	Loss-of-function	Somatic	SNV/indel	PAM	No
P247	M	53	Urologic	C64	8318	2018-03-23	48	TK	m4	X	3	Single-agent	ALK	Gain-of-function	Somatic	SNV/indel	TK	No
P248	F	41	Soft Tissue Other	C49	8832	2016-01-29	29	TK	m2A	III-A	1	Single-agent	COL1A1	Gain-of-function	Somatic	Fusion	NA	Yes
P248	F	41	Soft Tissue Other	C49	8832	2016-01-29	29	TK	m2A	III-A	1	Single-agent	PDGFB	Gain-of-function	Somatic	Overexpression	TK	Yes
P248	F	41	Soft Tissue Other	C49	8832	2016-01-29	29	TK	m2A	III-A	1	Single-agent	PDGFB	Gain-of-function	Somatic	Fusion	TK	Yes
P248	F	41	Soft Tissue Other	C49	8832	2016-01-29	29	TK	m2A	III-A	1	Single-agent	PDGFRB	Gain-of-function	Somatic	Overexpression	TK	Yes
P248	F	41	Soft Tissue Other	C49	8832	2016-01-29	29	RME	m3	IV-A	2	Single-agent	NF2	Loss-of-function	Somatic	Deletion	PAM	Yes
P248	F	41	Soft Tissue Other	C49	8832	2016-01-29	29	TK	m4	X	3	Single-agent	NTRK1	Gain-of-function	Somatic	Overexpression	TK	Yes
P248	F	41	Soft Tissue Other	C49	8832	2016-01-29	29	TK	m4	X	3	Single-agent	NTRK3	Gain-of-function	Somatic	Overexpression	TK	Yes
P248	F	41	Soft Tissue Other	C49	8832	2016-01-29	29	path	NA	NA	NA	NA	NA	NA	NA	NA	NA	Yes
P249	F	46	Leiomyosarcoma	C48	8890	2016-03-11	53	DDR,OTH	m2B	IV-A	1	Combination	ATM	Loss-of-function	Somatic	Deletion	DDR	Yes
P249	F	46	Leiomyosarcoma	C48	8890	2016-03-11	53	DDR,OTH	m2B	IV-A	1	Combination	BRCA2	Loss-of-function	Somatic	Deletion	DDR	Yes
P249	F	46	Leiomyosarcoma	C48	8890	2016-03-11	53	DDR,OTH	m2B	IV-A	1	Combination	ERCC3	Loss-of-function	Somatic	Deletion	DDR	Yes
P249	F	46	Leiomyosarcoma	C48	8890	2016-03-11	53	DDR,OTH	m2B	IV-A	1	Combination	ERCC5	Loss-of-function	Somatic	Deletion	DDR	Yes
P249	F	46	Leiomyosarcoma	C48	8890	2016-03-11	53	DDR,OTH	m2B	IV-A	1	Combination	FANCA	Loss-of-function	Somatic	Deletion	DDR	Yes
P249	F	46	Leiomyosarcoma	C48	8890	2016-03-11	53	DDR,OTH	m2B	IV-A	1	Combination	FANCF	Loss-of-function	Somatic	Deletion	DDR	Yes
P249	F	46	Leiomyosarcoma	C48	8890	2016-03-11	53	DDR,OTH	m2B	IV-A	1	Combination	FANCF	Loss-of-function	Somatic	Underexpression	DDR	Yes
P249	F	46	Leiomyosarcoma	C48	8890	2016-03-11	53	NA	NA	NA	NA	NA	XPA	Loss-of-function	Germline	NA	OTH	Yes
P250	F	55	Neuroendocrine and Adrenal	C75	8140	2017-06-30	414	IE	m2B	III-A	1	Single-agent	TMB	Composite biomarker	Somatic	Positive	IE	No
P250	F	55	Neuroendocrine and Adrenal	C75	8140	2017-06-30	414	OTH	m4	X	2	Single-agent	KMT2D	Loss-of-function	Somatic	SNV/indel	OTH	No
P251	M	61	Soft Tissue Other	C49	8815	2015-11-06	28	CC	m4	III-B	1	Single-agent	CDKN2A	Loss-of-function	Somatic	Underexpression	CC	Yes
P251	M	61	Soft Tissue Other	C49	8815	2015-11-06	28	CC	m4	III-B	1	Single-agent	CDKN2A	Loss-of-function	Somatic	Deletion	CC	Yes
P251	M	61	Soft Tissue Other	C49	8815	2015-11-06	28	CC	m4	III-B	1	Single-agent	CDKN2B	Loss-of-function	Somatic	Deletion	CC	Yes
P251	M	61	Soft Tissue Other	C49	8815	2015-11-06	28	CC	m4	III-B	1	Single-agent	CDKN2B	Loss-of-function	Somatic	Underexpression	CC	Yes
P251	M	61	Soft Tissue Other	C49	8815	2015-11-06	28	NA	NA	NA	NA	NA	PALB2	Loss-of-function	Germline	NA	DDR	Yes
P252	M	56	Colorectal	C18	8140	2018-11-16	167	NA	NA	NA	NA	NA	BRCA1	Loss-of-function	Germline	NA	DDR	No
P253	M	45	Urologic	C61	8140	2018-07-11	35	PAM	m2C	NA	1	Single-agent	PIK3R1	Loss-of-function	Somatic	SNV/indel	PAM	No
P253	M	45	Urologic	C61	8140	2018-07-11	35	DDR	m3	IV-A	2	Single-agent	BRCA2	Loss-of-function	Somatic	Deletion	DDR	No
P253	M	45	Urologic	C61	8140	2018-07-11	35	DDR	m3	IV-A	2	Single-agent	CHEK2	Loss-of-function	Somatic	Deletion	DDR	No
P253	M	45	Urologic	C61	8140	2018-07-11	35	DDR	m3	IV-A	2	Single-agent	HRD	Composite biomarker	Somatic	Positive	DDR	No
P253	M	45	Urologic	C61	8140	2018-07-11	35	DDR	m3	IV-A	2	Single-agent	NBN	Loss-of-function	Somatic	Deletion	DDR	No
P253	M	45	Urologic	C61	8140	2018-07-11	35	DDR	m3	IV-A	2	Single-agent	SBS3	Composite biomarker	Somatic	Mutational signature	DDR	No
P254	M	51	Ewing/PNET	C49	9260	2018-07-18	33	NA	NA	NA	NA	NA	NA	NA	NA	NA	NA	Yes
P255	M	56	GIST	C17	8936	2015-10-15	24	TK	m3	IV-A	1	Single-agent	FGF2	Gain-of-function	Somatic	Overexpression	TK	Yes
P255	M	56	GIST	C17	8936	2015-10-15	24	TK	m3	IV-A	1	Single-agent	FGFR2	Gain-of-function	Somatic	Overexpression	TK	Yes
P255	M	56	GIST	C17	8936	2015-10-15	24	TK	m3	IV-A	1	Single-agent	FGFR2	Gain-of-function	Somatic	Fusion	TK	Yes
P255	M	56	GIST	C17	8936	2015-10-15	24	TK	m3	IV-A	1	Single-agent	FLT4	Gain-of-function	Somatic	Overexpression	TK	Yes
P255	M	56	GIST	C17	8936	2015-10-15	24	TK	m3	IV-A	1	Single-agent	INA	Gain-of-function	Somatic	Fusion	NA	Yes
P255	M	56	GIST	C17	8936	2015-10-15	24	TK	m3	IV-A	1	Single-agent	INA	Gain-of-function	Somatic	Overexpression	NA	Yes
P255	M	56	GIST	C17	8936	2015-10-15	24	TK	m3	IV-A	1	Single-agent	KIT	Gain-of-function	Somatic	Overexpression	TK	Yes
P255	M	56	GIST	C17	8936	2015-10-15	24	TK	m3	IV-A	1	Single-agent	PDGFA	Gain-of-function	Somatic	Overexpression	TK	Yes
P255	M	56	GIST	C17	8936	2015-10-15	24	NA	NA	NA	NA	NA	ATM	Loss-of-function	Germline	NA	DDR	Yes
P256	M	34	Urologic	C62	9101	2016-09-09	106	IE	m2B	III-A	1	Single-agent	CD274	Gain-of-function	Somatic	Gain	IE	No
P256	M	34	Urologic	C62	9101	2016-09-09	106	IE	m2B	III-A	1	Single-agent	PDCD1LG2	Gain-of-function	Somatic	Gain	IE	No
P256	M	34	Urologic	C62	9101	2016-09-09	106	IE	m2B	III-A	1	Single-agent	TMB	Composite biomarker	Somatic	Positive	IE	No
P256	M	34	Urologic	C62	9101	2016-09-09	106	TK	m4	X	2	Single-agent	ERBB3	Gain-of-function	Somatic	SNV/indel	TK	No
P257	M	47	Liposarcoma	C49	8805	2015-07-03	19	CC	m1A	II-B	1	Single-agent	CDK4	Gain-of-function	Somatic	Gain	CC	Yes
P257	M	47	Liposarcoma	C49	8805	2015-07-03	19	CC,CC	m3	IV-A	2	Combination	CDK4	Gain-of-function	Somatic	Gain	CC	Yes
P257	M	47	Liposarcoma	C49	8805	2015-07-03	19	CC,CC	m3	IV-A	2	Combination	MDM2	Gain-of-function	Somatic	Gain	CC	Yes
P257	M	47	Liposarcoma	C49	8805	2015-07-03	19	path	NA	NA	NA	NA	NA	NA	NA	NA	NA	Yes
P258	F	55	Soft Tissue Other	C56	8980	2016-02-19	34	DDR	m2B	III-A	1	Single-agent	ATM	Loss-of-function	Somatic	Deletion	DDR	No
P258	F	55	Soft Tissue Other	C56	8980	2016-02-19	34	DDR	m2B	III-A	1	Single-agent	BRCA2	Loss-of-function	Somatic	Deletion	DDR	No
P258	F	55	Soft Tissue Other	C56	8980	2016-02-19	34	DDR	m2B	III-A	1	Single-agent	BRCA2	Loss-of-function	Somatic	Deletion	DDR	No
P258	F	55	Soft Tissue Other	C56	8980	2016-02-19	34	DDR	m2B	III-A	1	Single-agent	FANCB	Loss-of-function	Somatic	Deletion	DDR	No
P258	F	55	Soft Tissue Other	C56	8980	2016-02-19	34	IE	m2B	III-A	2	Single-agent	CD274	Gain-of-function	Somatic	Gain	IE	No
P259	M	37	Head and Neck	C31	8020	2018-05-18	99	DDR	m2B	I-C	1	Single-agent	BRCA2	Loss-of-function	Somatic	Deletion	DDR	Yes
P259	M	37	Head and Neck	C31	8020	2018-05-18	99	DDR	m2B	I-C	1	Single-agent	CHEK2	Loss-of-function	Somatic	Deletion	DDR	Yes
P259	M	37	Head and Neck	C31	8020	2018-05-18	99	DDR	m2B	I-C	1	Single-agent	FANCA	Loss-of-function	Somatic	Deletion	DDR	Yes
P259	M	37	Head and Neck	C31	8020	2018-05-18	99	DDR	m2B	I-C	1	Single-agent	HRD	Composite biomarker	Somatic	Positive	DDR	Yes
P259	M	37	Head and Neck	C31	8020	2018-05-18	99	DDR,OTH	m2B	I-C	1	Combination	BRCA2	Loss-of-function	Somatic	Deletion	DDR	Yes
P259	M	37	Head and Neck	C31	8020	2018-05-18	99	DDR,OTH	m2B	I-C	1	Combination	CHEK2	Loss-of-function	Somatic	Deletion	DDR	Yes
P259	M	37	Head and Neck	C31	8020	2018-05-18	99	DDR,OTH	m2B	I-C	1	Combination	FANCA	Loss-of-function	Somatic	Deletion	DDR	Yes
P259	M	37	Head and Neck	C31	8020	2018-05-18	99	DDR,OTH	m2B	I-C	1	Combination	HRD	Composite biomarker	Somatic	Positive	DDR	Yes
P259	M	37	Head and Neck	C31	8020	2018-05-18	99	PAM	m2C	NA	2	Single-agent	MTOR	Gain-of-function	Somatic	Overexpression	PAM	Yes
P259	M	37	Head and Neck	C31	8020	2018-05-18	99	PAM	m2C	NA	2	Single-agent	PIK3CA	Gain-of-function	Somatic	SNV/indel	PAM	Yes
P259	M	37	Head and Neck	C31	8020	2018-05-18	99	PAM	m2C	NA	2	Single-agent	RICTOR	Gain-of-function	Somatic	Overexpression	PAM	Yes
P259	M	37	Head and Neck	C31	8020	2018-05-18	99	PAM	m2C	NA	2	Single-agent	RICTOR	Gain-of-function	Somatic	Gain	PAM	Yes
P259	M	37	Head and Neck	C31	8020	2018-05-18	99	TK	m3	IV-A	3	Single-agent	ERBB2	Gain-of-function	Somatic	Gain	TK	Yes
P259	M	37	Head and Neck	C31	8020	2018-05-18	99	TK	m3	IV-A	3	Single-agent	ERBB4	Gain-of-function	Somatic	Overexpression	TK	Yes
P259	M	37	Head and Neck	C31	8020	2018-05-18	99	OTH	m2B	III-A	1	Single-agent	PIK3CA	Gain-of-function	Somatic	SNV/indel	PAM	Yes
P260	M	50	GIST	C17	8936	2016-07-22	41	RME	m4	X	1	Single-agent	PTPRG	Loss-of-function	Somatic	SNV/indel	NA	Yes
P260	M	50	GIST	C17	8936	2016-07-22	41	TK	m4	IV-A	2	Single-agent	FGFR1	Gain-of-function	Somatic	Overexpression	TK	Yes
P261	F	35	Ewing/PNET	C41	9260	2018-03-02	57	TK	m3	IV-A	1	Single-agent	FGF1	Gain-of-function	Somatic	Gain	TK	No
P261	F	35	Ewing/PNET	C41	9260	2018-03-02	57	TK	m3	IV-A	1	Single-agent	FGF2	Gain-of-function	Somatic	Gain	TK	No
P261	F	35	Ewing/PNET	C41	9260	2018-03-02	57	TK	m3	IV-A	1	Single-agent	FGFR3	Gain-of-function	Somatic	Gain	TK	No
P261	F	35	Ewing/PNET	C41	9260	2018-03-02	57	TK	m3	IV-A	1	Single-agent	FGFR4	Gain-of-function	Somatic	Gain	TK	No
P262	F	61	Neuroendocrine and Adrenal	C34	8041	2017-11-17	570	IE,IE	m1B	I-C	1	Combination	ATRX	Loss-of-function	Somatic	Deletion	OTH	Yes
P262	F	61	Neuroendocrine and Adrenal	C34	8041	2017-11-17	570	IE,IE	m1B	I-C	1	Combination	CD274	Gain-of-function	Somatic	Underexpression	IE	Yes
P262	F	61	Neuroendocrine and Adrenal	C34	8041	2017-11-17	570	IE,IE	m1B	I-C	1	Combination	PMS1	Loss-of-function	Somatic	Deletion	DDR	Yes
P262	F	61	Neuroendocrine and Adrenal	C34	8041	2017-11-17	570	IE,IE	m1B	I-C	1	Combination	PMS1	Loss-of-function	Somatic	SNV/indel	DDR	Yes
P262	F	61	Neuroendocrine and Adrenal	C34	8041	2017-11-17	570	IE,IE	m1B	I-C	1	Combination	SBS4	Composite biomarker	Somatic	Mutational signature	NA	Yes
P262	F	61	Neuroendocrine and Adrenal	C34	8041	2017-11-17	570	IE,IE	m1B	I-C	1	Combination	TMB	Composite biomarker	Somatic	Positive	IE	Yes
P262	F	61	Neuroendocrine and Adrenal	C34	8041	2017-11-17	570	OTH	m2B	III-A	1	Single-agent	CD274	Gain-of-function	Somatic	Underexpression	IE	Yes
P262	F	61	Neuroendocrine and Adrenal	C34	8041	2017-11-17	570	DEV	m1B	III-A	2	Single-agent	DLL3	Gain-of-function	Somatic	Overexpression	DEV	Yes
P262	F	61	Neuroendocrine and Adrenal	C34	8041	2017-11-17	570	OTH	m3	IV-A	3	Single-agent	ASCL1	Gain-of-function	Somatic	Overexpression	OTH	Yes
P262	F	61	Neuroendocrine and Adrenal	C34	8041	2017-11-17	570	OTH	m3	IV-A	3	Single-agent	BRD4	Gain-of-function	Somatic	Overexpression	OTH	Yes
P262	F	61	Neuroendocrine and Adrenal	C34	8041	2017-11-17	570	OTH	m3	IV-A	3	Single-agent	BRD4	Gain-of-function	Somatic	SNV/indel	OTH	Yes
P262	F	61	Neuroendocrine and Adrenal	C34	8041	2017-11-17	570	OTH	m3	IV-A	3	Single-agent	NF1	Loss-of-function	Somatic	Underexpression	RME	Yes
P262	F	61	Neuroendocrine and Adrenal	C34	8041	2017-11-17	570	OTH	m3	IV-A	3	Single-agent	NF1	Loss-of-function	Somatic	Deletion	RME	Yes
P262	F	61	Neuroendocrine and Adrenal	C34	8041	2017-11-17	570	RME	m2C	NA	3	Single-agent	BRAF	Gain-of-function	Somatic	Overexpression	RME	Yes
P262	F	61	Neuroendocrine and Adrenal	C34	8041	2017-11-17	570	RME	m2C	NA	3	Single-agent	BRAF	Gain-of-function	Somatic	Gain	RME	Yes
P262	F	61	Neuroendocrine and Adrenal	C34	8041	2017-11-17	570	RME	m2C	NA	3	Single-agent	HRAS	Gain-of-function	Somatic	Gain	RME	Yes
P262	F	61	Neuroendocrine and Adrenal	C34	8041	2017-11-17	570	RME	m2C	NA	3	Single-agent	NF1	Loss-of-function	Somatic	Underexpression	RME	Yes
P262	F	61	Neuroendocrine and Adrenal	C34	8041	2017-11-17	570	RME	m2C	NA	3	Single-agent	NF1	Loss-of-function	Somatic	Deletion	RME	Yes
P262	F	61	Neuroendocrine and Adrenal	C34	8041	2017-11-17	570	DDR,OTH	m4	X	4	Combination	FANCI	Loss-of-function	Somatic	SNV/indel	DDR	Yes
P262	F	61	Neuroendocrine and Adrenal	C34	8041	2017-11-17	570	DDR,OTH	m4	X	4	Combination	PMS1	Loss-of-function	Somatic	SNV/indel	DDR	Yes
P262	F	61	Neuroendocrine and Adrenal	C34	8041	2017-11-17	570	DDR,OTH	m4	X	4	Combination	SBS8	Composite biomarker	Somatic	Mutational signature	DDR	Yes
P263	M	52	Head and Neck	C11	8082	2016-04-08	60	IE	m2B	I-C	1	Single-agent	CD274	Gain-of-function	Somatic	Overexpression	IE	Yes
P263	M	52	Head and Neck	C11	8082	2016-04-08	60	IE	m2B	I-C	1	Single-agent	CTLA4	Gain-of-function	Somatic	Overexpression	IE	Yes
P263	M	52	Head and Neck	C11	8082	2016-04-08	60	CC	m3	IV-A	2	Single-agent	CDKN2A	Loss-of-function	Somatic	Deletion	CC	Yes
P263	M	52	Head and Neck	C11	8082	2016-04-08	60	CC	m3	IV-A	2	Single-agent	CDKN2B	Loss-of-function	Somatic	Deletion	CC	Yes
P263	M	52	Head and Neck	C11	8082	2016-04-08	60	CC	m3	IV-A	2	Single-agent	RB1	Loss-of-function	Somatic	Deletion	CC	Yes
P264	F	53	Soft Tissue Other	C50	8840	2018-01-16	54	DDR,OTH	m3	IV-A	1	Combination	FANCA	Loss-of-function	Germline	SNV/indel	DDR	Yes
P264	F	53	Soft Tissue Other	C50	8840	2018-01-16	54	DDR,OTH	m3	IV-A	1	Combination	SBS3	Composite biomarker	Germline	Mutational signature	DDR	Yes
P264	F	53	Soft Tissue Other	C50	8840	2018-01-16	54	CC	m2B	III-A	2	Single-agent	CDK4	Gain-of-function	Somatic	Gain	CC	Yes
P264	F	53	Soft Tissue Other	C50	8840	2018-01-16	54	CC	m2B	III-A	2	Single-agent	MDM2	Gain-of-function	Somatic	Gain	CC	Yes
P264	F	53	Soft Tissue Other	C50	8840	2018-01-16	54	OTH	m3	IV-A	3	Single-agent	ARL2BPP10	Loss-of-function	Somatic	Fusion	NA	Yes
P264	F	53	Soft Tissue Other	C50	8840	2018-01-16	54	OTH	m3	IV-A	3	Single-agent	SMARCB1	Loss-of-function	Somatic	Fusion	DEV	Yes
P264	F	53	Soft Tissue Other	C50	8840	2018-01-16	54	CC	m3	IV-A	4	Single-agent	CDK4	Gain-of-function	Somatic	Gain	CC	Yes
P264	F	53	Soft Tissue Other	C50	8840	2018-01-16	54	CC	m3	IV-A	4	Single-agent	MDM2	Gain-of-function	Somatic	Gain	CC	Yes
P264	F	53	Soft Tissue Other	C50	8840	2018-01-16	54	path	NA	NA	NA	NA	NA	NA	NA	NA	NA	Yes
P265	M	31	Urologic	C62	9065	2018-05-18	109	DDR,OTH	m3	IV-A	1	Combination	NBN	Loss-of-function	Somatic	Underexpression	DDR	Yes
P265	M	31	Urologic	C62	9065	2018-05-18	109	DDR,OTH	m3	IV-A	1	Combination	NBN	Loss-of-function	Somatic	Deletion	DDR	Yes
P265	M	31	Urologic	C62	9065	2018-05-18	109	DDR,OTH	m3	IV-A	1	Combination	RAD54B	Loss-of-function	Somatic	Underexpression	DDR	Yes
P265	M	31	Urologic	C62	9065	2018-05-18	109	DDR,OTH	m3	IV-A	1	Combination	RAD54B	Loss-of-function	Somatic	Deletion	DDR	Yes
P265	M	31	Urologic	C62	9065	2018-05-18	109	DDR,OTH	m3	IV-A	1	Combination	SBS3	Composite biomarker	Somatic	Mutational signature	DDR	Yes
P265	M	31	Urologic	C62	9065	2018-05-18	109	RME	m3	IV-A	2	Single-agent	KRAS	Gain-of-function	Somatic	Gain	RME	Yes
P265	M	31	Urologic	C62	9065	2018-05-18	109	RME	m3	IV-A	2	Single-agent	KRAS	Gain-of-function	Somatic	Overexpression	RME	Yes
P265	M	31	Urologic	C62	9065	2018-05-18	109	RME	m3	IV-A	2	Single-agent	NRAS	Gain-of-function	Somatic	Gain	RME	Yes
P265	M	31	Urologic	C62	9065	2018-05-18	109	RME	m3	IV-A	2	Single-agent	NRAS	Gain-of-function	Somatic	Overexpression	RME	Yes
P265	M	31	Urologic	C62	9065	2018-05-18	109	RME	m3	IV-A	2	Single-agent	RAF1	Gain-of-function	Somatic	Gain	RME	Yes
P265	M	31	Urologic	C62	9065	2018-05-18	109	RME	m3	IV-A	2	Single-agent	RAF1	Gain-of-function	Somatic	Overexpression	RME	Yes
P265	M	31	Urologic	C62	9065	2018-05-18	109	TK	m4	X	3	Single-agent	EGFR	Gain-of-function	Somatic	Gain	TK	Yes
P265	M	31	Urologic	C62	9065	2018-05-18	109	TK	m4	X	3	Single-agent	EGFR	Gain-of-function	Somatic	Overexpression	TK	Yes
P265	M	31	Urologic	C62	9065	2018-05-18	109	TK	m4	X	3	Single-agent	ERBB3	Gain-of-function	Somatic	Gain	TK	Yes
P265	M	31	Urologic	C62	9065	2018-05-18	109	TK	m4	X	3	Single-agent	ERBB3	Gain-of-function	Somatic	Overexpression	TK	Yes
P265	M	31	Urologic	C62	9065	2018-05-18	109	TK	m4	X	3	Single-agent	SRC	Gain-of-function	Somatic	Overexpression	TK	Yes
P265	M	31	Urologic	C62	9065	2018-05-18	109	TK	m4	X	3	Single-agent	SRC	Gain-of-function	Somatic	Gain	TK	Yes
P265	M	31	Urologic	C62	9065	2018-05-18	109	TK	m4	X	3	Single-agent	FGF4	Gain-of-function	Somatic	Gain	TK	Yes
P265	M	31	Urologic	C62	9065	2018-05-18	109	TK	m4	X	3	Single-agent	FGF4	Gain-of-function	Somatic	Overexpression	TK	Yes
P265	M	31	Urologic	C62	9065	2018-05-18	109	TK	m4	X	3	Single-agent	FGFR3	Gain-of-function	Somatic	Gain	TK	Yes
P265	M	31	Urologic	C62	9065	2018-05-18	109	TK	m4	X	3	Single-agent	FGFR3	Gain-of-function	Somatic	Overexpression	TK	Yes
P265	M	31	Urologic	C62	9065	2018-05-18	109	TK	m4	X	3	Single-agent	FGFR4	Gain-of-function	Somatic	Gain	TK	Yes
P265	M	31	Urologic	C62	9065	2018-05-18	109	TK	m4	X	3	Single-agent	FGFR4	Gain-of-function	Somatic	Overexpression	TK	Yes
P266	M	27	Soft Tissue Other	C49	8815	2017-06-30	8	TK	m4	X	2	Single-agent	FGFR1	Gain-of-function	Somatic	Overexpression	TK	Yes
P266	M	27	Soft Tissue Other	C49	8815	2017-06-30	8	TK	m4	X	2	Single-agent	FLT1	Gain-of-function	Somatic	Overexpression	TK	Yes
P266	M	27	Soft Tissue Other	C49	8815	2017-06-30	8	TK	m4	X	2	Single-agent	KDR	Gain-of-function	Somatic	Overexpression	TK	Yes
P266	M	27	Soft Tissue Other	C49	8815	2017-06-30	8	TK	m2C	NA	1	Single-agent	NTRK	Gain-of-function	Somatic	Overexpression	NA	Yes
P267	M	42	Soft Tissue Other	C49	8910	2014-10-24	23	path	NA	NA	NA	NA	NA	NA	NA	NA	NA	Yes
P268	M	52	Hematopoietic	C83	9680	2014-11-14	234	TK	m3	IV-A	1	Single-agent	SOCS1	Loss-of-function	Somatic	SNV/indel	IE	Yes
P268	M	52	Hematopoietic	C83	9680	2014-11-14	234	NA	NA	NA	NA	NA	PTEN	Loss-of-function	Germline	NA	PAM	Yes
P269	F	36	Urologic	C67	8010	2017-07-28	181	IE	m2B	III-A	1	Single-agent	TMB	Composite biomarker	Somatic	Positive	IE	Yes
P270	M	66	Soft Tissue Other	C49	8815	2018-05-04	34	path	NA	NA	NA	NA	NA	NA	NA	NA	NA	Yes
P270	M	66	Soft Tissue Other	C49	8815	2018-05-04	34	TK	m2C	NA	1	Single-agent	FGFR1	Gain-of-function	Somatic	Gain	TK	Yes
P270	M	66	Soft Tissue Other	C49	8815	2018-05-04	34	TK	m2C	NA	1	Single-agent	FGFR1	Gain-of-function	Somatic	Overexpression	TK	Yes
P270	M	66	Soft Tissue Other	C49	8815	2018-05-04	34	TK,TK	m2C	NA	2	Combination	NRG1	Gain-of-function	Somatic	Overexpression	TK	Yes
P270	M	66	Soft Tissue Other	C49	8815	2018-05-04	34	TK,TK	m2C	NA	2	Combination	NRG2	Gain-of-function	Somatic	Overexpression	TK	Yes
P270	M	66	Soft Tissue Other	C49	8815	2018-05-04	34	TK,TK	m2C	NA	2	Combination	NRG4	Gain-of-function	Somatic	Overexpression	TK	Yes
P270	M	66	Soft Tissue Other	C49	8815	2018-05-04	34	TK	m4	X	3	Single-agent	NRG1	Gain-of-function	Somatic	Overexpression	TK	Yes
P270	M	66	Soft Tissue Other	C49	8815	2018-05-04	34	TK	m4	X	3	Single-agent	NRG2	Gain-of-function	Somatic	Overexpression	TK	Yes
P270	M	66	Soft Tissue Other	C49	8815	2018-05-04	34	TK	m4	X	3	Single-agent	NRG4	Gain-of-function	Somatic	Overexpression	TK	Yes
P270	M	66	Soft Tissue Other	C49	8815	2018-05-04	34	IE	m2B	III-A	4	Single-agent	LAG3	Gain-of-function	Somatic	Overexpression	IE	Yes
P271	F	62	Melanoma	C69	8720	2013-11-29	21	NA	NA	NA	NA	NA	NA	NA	NA	NA	NA	Yes
P272	F	45	Liposarcoma	C49	8852	2015-11-27	18	PAM	m2C	NA	1	Single-agent	PIK3CA	Gain-of-function	Somatic	SNV/indel	PAM	No
P273	F	32	Bone	C41	9372	2014-06-20	16	PAM	m2B	III-A	2	Single-agent	PPP1R10	Gain-of-function	Somatic	SNV/indel	NA	No
P273	F	32	Bone	C41	9372	2014-06-20	16	PAM	m2B	III-A	2	Single-agent	PTEN	Loss-of-function	Somatic	SNV/indel	PAM	No
P273	F	32	Bone	C41	9372	2014-06-20	16	PAM	m2B	III-A	2	Single-agent	PTEN	Loss-of-function	Somatic	Deletion	PAM	No
P274	F	34	Soft Tissue Other	C49	8800	2014-03-28	11	NA	NA	NA	NA	NA	NA	NA	NA	NA	NA	Yes
P275	M	55	Melanoma	C07	8010	2018-03-23	155	IE,RME	m1B	I-C	1	Combination	CTLA4	Gain-of-function	Somatic	Overexpression	IE	Yes
P275	M	55	Melanoma	C07	8010	2018-03-23	155	IE,RME	m1B	I-C	1	Combination	LAG3	Gain-of-function	Somatic	Overexpression	IE	Yes
P275	M	55	Melanoma	C07	8010	2018-03-23	155	IE,RME	m1B	I-C	1	Combination	PDCD1LG2	Gain-of-function	Somatic	Overexpression	IE	Yes
P275	M	55	Melanoma	C07	8010	2018-03-23	155	IE,RME	m1B	I-C	1	Combination	TMB	Composite biomarker	Somatic	Positive	IE	Yes
P275	M	55	Melanoma	C07	8010	2018-03-23	155	IE	m1B	I-C	2	Single-agent	CTLA4	Gain-of-function	Somatic	Overexpression	IE	Yes
P275	M	55	Melanoma	C07	8010	2018-03-23	155	IE	m1B	I-C	2	Single-agent	LAG3	Gain-of-function	Somatic	Overexpression	IE	Yes
P275	M	55	Melanoma	C07	8010	2018-03-23	155	IE	m1B	I-C	2	Single-agent	PDCD1LG2	Gain-of-function	Somatic	Overexpression	IE	Yes
P275	M	55	Melanoma	C07	8010	2018-03-23	155	IE	m1B	I-C	2	Single-agent	TMB	Composite biomarker	Somatic	Positive	IE	Yes
P275	M	55	Melanoma	C07	8010	2018-03-23	155	RME,RME	m2C	NA	3	Combination	AGK	Gain-of-function	Somatic	Fusion	NA	Yes
P275	M	55	Melanoma	C07	8010	2018-03-23	155	RME,RME	m2C	NA	3	Combination	BRAF	Gain-of-function	Somatic	Fusion	RME	Yes
P275	M	55	Melanoma	C07	8010	2018-03-23	155	RME	m2C	NA	4	Single-agent	AGK	Gain-of-function	Somatic	Fusion	NA	Yes
P275	M	55	Melanoma	C07	8010	2018-03-23	155	RME	m2C	NA	4	Single-agent	BRAF	Gain-of-function	Somatic	Fusion	RME	Yes
P275	M	55	Melanoma	C07	8010	2018-03-23	155	path	NA	NA	NA	NA	NA	NA	NA	NA	NA	Yes
P276	F	46	Melanoma	C52	8730	2016-10-28	69	CC	m2B	III-A	1	Single-agent	CDK4	Gain-of-function	Somatic	Overexpression	CC	Yes
P276	F	46	Melanoma	C52	8730	2016-10-28	69	CC	m2B	III-A	1	Single-agent	MDM2	Gain-of-function	Somatic	Overexpression	CC	Yes
P276	F	46	Melanoma	C52	8730	2016-10-28	69	CC	m2B	III-A	1	Single-agent	RB1	Loss-of-function	Somatic	Underexpression	CC	Yes
P276	F	46	Melanoma	C52	8730	2016-10-28	69	CC	m2B	III-A	1	Single-agent	RPTOR	Gain-of-function	Somatic	Overexpression	PAM	Yes
P276	F	46	Melanoma	C52	8730	2016-10-28	69	RME	m4	X	2	Single-agent	ERBB3	Gain-of-function	Somatic	Overexpression	TK	Yes
P276	F	46	Melanoma	C52	8730	2016-10-28	69	RME	m4	X	2	Single-agent	ERBB3	Gain-of-function	Somatic	SNV/indel	TK	Yes
P276	F	46	Melanoma	C52	8730	2016-10-28	69	RME	m4	X	2	Single-agent	MAP2K2	Gain-of-function	Somatic	Overexpression	RME	Yes
P276	F	46	Melanoma	C52	8730	2016-10-28	69	RME,TK	m4	X	2	Combination	ERBB3	Gain-of-function	Somatic	SNV/indel	TK	Yes
P276	F	46	Melanoma	C52	8730	2016-10-28	69	RME,TK	m4	X	2	Combination	ERBB3	Gain-of-function	Somatic	Overexpression	TK	Yes
P276	F	46	Melanoma	C52	8730	2016-10-28	69	RME,TK	m4	X	2	Combination	MAP2K2	Gain-of-function	Somatic	Overexpression	RME	Yes
P277	F	48	NSCLC	C34	8140	2015-11-27	405	IE	m1B	I-A	1	Single-agent	CD274	Gain-of-function	Somatic	Overexpression	IE	Yes
P277	F	48	NSCLC	C34	8140	2015-11-27	405	IE	m1B	I-A	1	Single-agent	TMB	Composite biomarker	Somatic	Positive	IE	Yes
P277	F	48	NSCLC	C34	8140	2015-11-27	405	RME	m3	IV-A	3	Single-agent	CDK4	Gain-of-function	Somatic	Gain	CC	Yes
P277	F	48	NSCLC	C34	8140	2015-11-27	405	RME	m3	IV-A	3	Single-agent	CDKN2A	Loss-of-function	Somatic	Deletion	CC	Yes
P277	F	48	NSCLC	C34	8140	2015-11-27	405	RME	m3	IV-A	3	Single-agent	CDKN2B	Loss-of-function	Somatic	Deletion	CC	Yes
P277	F	48	NSCLC	C34	8140	2015-11-27	405	CC	m2B	I-C	2	Single-agent	BRAF	Gain-of-function	Somatic	SNV/indel	RME	Yes
P278	F	39	Head and Neck	C11	8200	2017-10-06	53	OTH	m3	IV-A	2	Single-agent	MYB	Gain-of-function	Somatic	Fusion	OTH	Yes
P278	F	39	Head and Neck	C11	8200	2017-10-06	53	OTH	m3	IV-A	2	Single-agent	NFIB	Gain-of-function	Somatic	Fusion	OTH	Yes
P278	F	39	Head and Neck	C11	8200	2017-10-06	53	TK	m2B	III-A	1	Single-agent	FGF4	Gain-of-function	Somatic	Overexpression	TK	Yes
P278	F	39	Head and Neck	C11	8200	2017-10-06	53	TK	m2B	III-A	1	Single-agent	FGFR1	Gain-of-function	Somatic	Overexpression	TK	Yes
P278	F	39	Head and Neck	C11	8200	2017-10-06	53	TK	m2B	III-A	1	Single-agent	FGFR2	Gain-of-function	Somatic	Overexpression	TK	Yes
P278	F	39	Head and Neck	C11	8200	2017-10-06	53	TK	m2B	III-A	1	Single-agent	IGF1R	Gain-of-function	Somatic	Overexpression	TK	Yes
P278	F	39	Head and Neck	C11	8200	2017-10-06	53	TK	m2B	III-A	1	Single-agent	KDR	Gain-of-function	Somatic	Gain	TK	Yes
P278	F	39	Head and Neck	C11	8200	2017-10-06	53	TK	m2B	III-A	1	Single-agent	KIT	Gain-of-function	Somatic	Gain	TK	Yes
P278	F	39	Head and Neck	C11	8200	2017-10-06	53	TK	m2B	III-A	1	Single-agent	KIT	Gain-of-function	Somatic	Overexpression	TK	Yes
P278	F	39	Head and Neck	C11	8200	2017-10-06	53	TK	m2B	III-A	1	Single-agent	PDGFRA	Gain-of-function	Somatic	Gain	TK	Yes
P278	F	39	Head and Neck	C11	8200	2017-10-06	53	TK	m2B	III-A	1	Single-agent	PDGFRA	Gain-of-function	Somatic	Overexpression	TK	Yes
P278	F	39	Head and Neck	C11	8200	2017-10-06	53	CC	m2C	NA	3	Single-agent	MDM2	Gain-of-function	Somatic	Overexpression	CC	Yes
P278	F	39	Head and Neck	C11	8200	2017-10-06	53	CC	m2C	NA	3	Single-agent	MDM2	Gain-of-function	Somatic	Gain	CC	Yes
P279	F	42	Other	C73	8345	2018-08-24	22	TK	m1C	NA	1	Single-agent	RET	Gain-of-function	Somatic	SNV/indel	TK	No
P279	F	42	Other	C73	8345	2018-08-24	22	PAM,TK	m1C	NA	2	Combination	FLCN	Loss-of-function	Somatic	Deletion	PAM	No
P279	F	42	Other	C73	8345	2018-08-24	22	PAM,TK	m1C	NA	2	Combination	RET	Gain-of-function	Somatic	SNV/indel	TK	No
P280	M	46	Urologic	C62	9070	2018-07-11	187	IE	m2B	III-A	1	Single-agent	TMB	Composite biomarker	Somatic	Positive	IE	Yes
P280	M	46	Urologic	C62	9070	2018-07-11	187	DDR	m2C	NA	2	Single-agent	HRD	Composite biomarker	Somatic	Positive	DDR	Yes
P280	M	46	Urologic	C62	9070	2018-07-11	187	DDR	m2C	NA	2	Single-agent	SBS8	Composite biomarker	Somatic	Mutational signature	DDR	Yes
P280	M	46	Urologic	C62	9070	2018-07-11	187	TK	m2B	III-A	3	Single-agent	FGFR3	Gain-of-function	Somatic	Gain	TK	Yes
P280	M	46	Urologic	C62	9070	2018-07-11	187	TK	m2B	III-A	3	Single-agent	FGFR3	Gain-of-function	Somatic	Overexpression	TK	Yes
P280	M	46	Urologic	C62	9070	2018-07-11	187	TK	m2B	III-A	3	Single-agent	FGFR4	Gain-of-function	Somatic	Overexpression	TK	Yes
P280	M	46	Urologic	C62	9070	2018-07-11	187	TK	m2B	III-A	3	Single-agent	KLB	Gain-of-function	Somatic	Overexpression	TK	Yes
P281	M	23	Ewing/PNET	C49	9260	2017-11-03	22	DDR	m3	IV-A	1	Single-agent	SETD2	Loss-of-function	Somatic	SNV/indel	OTH	Yes
P281	M	23	Ewing/PNET	C49	9260	2017-11-03	22	OTH	m3	IV-A	2	Single-agent	EZH2	Gain-of-function	Somatic	Overexpression	OTH	Yes
P281	M	23	Ewing/PNET	C49	9260	2017-11-03	22	CC	m3	IV-A	3	Single-agent	AURKA	Gain-of-function	Somatic	Overexpression	CC	Yes
P281	M	23	Ewing/PNET	C49	9260	2017-11-03	22	CC	m3	IV-A	3	Single-agent	EWSR1	Gain-of-function	Somatic	Fusion	OTH	Yes
P281	M	23	Ewing/PNET	C49	9260	2017-11-03	22	CC	m3	IV-A	3	Single-agent	FLI1	Gain-of-function	Somatic	Fusion	OTH	Yes
P281	M	23	Ewing/PNET	C49	9260	2017-11-03	22	CC	m2C	NA	4	Single-agent	CDKN2A	Loss-of-function	Somatic	Deletion	CC	Yes
P281	M	23	Ewing/PNET	C49	9260	2017-11-03	22	CC	m2C	NA	4	Single-agent	CDKN2B	Loss-of-function	Somatic	Deletion	CC	Yes
P282	M	61	Soft Tissue Other	C96	9758	2015-08-28	NA	TK	m4	X	2	Single-agent	CSF1R	Gain-of-function	Somatic	Overexpression	TK	Yes
P282	M	61	Soft Tissue Other	C96	9758	2015-08-28	NA	TK	m4	X	2	Single-agent	FGFR1	Gain-of-function	Somatic	Overexpression	TK	Yes
P282	M	61	Soft Tissue Other	C96	9758	2015-08-28	NA	TK	m4	X	2	Single-agent	FGFR2	Gain-of-function	Somatic	Overexpression	TK	Yes
P282	M	61	Soft Tissue Other	C96	9758	2015-08-28	NA	TK	m4	X	2	Single-agent	FLT1	Gain-of-function	Somatic	Overexpression	TK	Yes
P282	M	61	Soft Tissue Other	C96	9758	2015-08-28	NA	TK	m4	X	2	Single-agent	FLT3	Gain-of-function	Somatic	Overexpression	TK	Yes
P282	M	61	Soft Tissue Other	C96	9758	2015-08-28	NA	TK	m4	X	2	Single-agent	FLT4	Gain-of-function	Somatic	Overexpression	TK	Yes
P282	M	61	Soft Tissue Other	C96	9758	2015-08-28	NA	TK	m4	X	2	Single-agent	KIT	Gain-of-function	Somatic	Overexpression	TK	Yes
P282	M	61	Soft Tissue Other	C96	9758	2015-08-28	NA	TK	m4	X	2	Single-agent	MST1R	Gain-of-function	Somatic	Overexpression	TK	Yes
P282	M	61	Soft Tissue Other	C96	9758	2015-08-28	NA	TK	m4	X	2	Single-agent	NTRK1	Gain-of-function	Somatic	Overexpression	TK	Yes
P282	M	61	Soft Tissue Other	C96	9758	2015-08-28	NA	TK	m4	X	2	Single-agent	NTRK3	Gain-of-function	Somatic	Overexpression	TK	Yes
P282	M	61	Soft Tissue Other	C96	9758	2015-08-28	NA	TK	m4	X	2	Single-agent	PDGFRB	Gain-of-function	Somatic	Overexpression	TK	Yes
P282	M	61	Soft Tissue Other	C96	9758	2015-08-28	NA	TK	m4	X	2	Single-agent	RET	Gain-of-function	Somatic	Overexpression	TK	Yes
P282	M	61	Soft Tissue Other	C96	9758	2015-08-28	NA	TK	m4	X	1	Single-agent	JAK1	Gain-of-function	Somatic	Overexpression	TK	Yes
P282	M	61	Soft Tissue Other	C96	9758	2015-08-28	NA	TK	m4	X	1	Single-agent	JAK2	Gain-of-function	Somatic	Overexpression	TK	Yes
P282	M	61	Soft Tissue Other	C96	9758	2015-08-28	NA	TK	m4	X	1	Single-agent	JAK3	Gain-of-function	Somatic	Overexpression	TK	Yes
P282	M	61	Soft Tissue Other	C96	9758	2015-08-28	NA	TK	m4	X	1	Single-agent	OSM	Gain-of-function	Somatic	Overexpression	OTH	Yes
P282	M	61	Soft Tissue Other	C96	9758	2015-08-28	NA	TK	m4	X	1	Single-agent	OSMR	Gain-of-function	Somatic	Overexpression	TK	Yes
P283	F	49	Leiomyosarcoma	C55	8890	2017-07-14	37	DDR	m3	IV-A	1	Single-agent	BRCA2	Loss-of-function	Somatic	Deletion	DDR	Yes
P283	F	49	Leiomyosarcoma	C55	8890	2017-07-14	37	DDR	m3	IV-A	1	Single-agent	CHEK2	Loss-of-function	Somatic	Deletion	DDR	Yes
P283	F	49	Leiomyosarcoma	C55	8890	2017-07-14	37	DDR	m3	IV-A	1	Single-agent	NBN	Loss-of-function	Somatic	SNV/indel	DDR	Yes
P283	F	49	Leiomyosarcoma	C55	8890	2017-07-14	37	DDR	m3	IV-A	1	Single-agent	SBS3	Composite biomarker	Somatic	Mutational signature	DDR	Yes
P283	F	49	Leiomyosarcoma	C55	8890	2017-07-14	37	OTH	m3	X	2	Single-agent	AR	Gain-of-function	Somatic	Overexpression	DEV	Yes
P283	F	49	Leiomyosarcoma	C55	8890	2017-07-14	37	OTH	m3	X	2	Single-agent	ESR1	Gain-of-function	Somatic	Overexpression	DEV	Yes
P283	F	49	Leiomyosarcoma	C55	8890	2017-07-14	37	OTH	m3	X	2	Single-agent	FOXO1	Gain-of-function	Somatic	Overexpression	DEV	Yes
P283	F	49	Leiomyosarcoma	C55	8890	2017-07-14	37	OTH	m3	X	2	Single-agent	FOXO1	Gain-of-function	Somatic	Gain	DEV	Yes
P284	M	27	Neuroendocrine and Adrenal	C80	8249	2018-01-19	25	DDR,OTH	m2C	NA	1	Combination	ATM	Loss-of-function	Somatic	Deletion	DDR	No
P284	M	27	Neuroendocrine and Adrenal	C80	8249	2018-01-19	25	DDR,OTH	m2C	NA	1	Combination	ATR	Loss-of-function	Somatic	Deletion	DDR	No
P284	M	27	Neuroendocrine and Adrenal	C80	8249	2018-01-19	25	DDR,OTH	m2C	NA	1	Combination	BRCA2	Loss-of-function	Somatic	Deletion	DDR	No
P284	M	27	Neuroendocrine and Adrenal	C80	8249	2018-01-19	25	DDR,OTH	m2C	NA	1	Combination	CHEK1	Loss-of-function	Somatic	Deletion	DDR	No
P284	M	27	Neuroendocrine and Adrenal	C80	8249	2018-01-19	25	DDR,OTH	m2C	NA	1	Combination	DDB1	Loss-of-function	Somatic	Deletion	DDR	No
P284	M	27	Neuroendocrine and Adrenal	C80	8249	2018-01-19	25	DDR,OTH	m2C	NA	1	Combination	ERCC5	Loss-of-function	Somatic	Deletion	DDR	No
P284	M	27	Neuroendocrine and Adrenal	C80	8249	2018-01-19	25	DDR,OTH	m2C	NA	1	Combination	ERCC6	Loss-of-function	Somatic	Deletion	DDR	No
P284	M	27	Neuroendocrine and Adrenal	C80	8249	2018-01-19	25	DDR,OTH	m2C	NA	1	Combination	FANCD2	Loss-of-function	Somatic	Deletion	DDR	No
P284	M	27	Neuroendocrine and Adrenal	C80	8249	2018-01-19	25	DDR,OTH	m2C	NA	1	Combination	HDAC2	Loss-of-function	Somatic	Deletion	DDR	No
P284	M	27	Neuroendocrine and Adrenal	C80	8249	2018-01-19	25	DDR,OTH	m2C	NA	1	Combination	HRD	Composite biomarker	Somatic	Positive	DDR	No
P284	M	27	Neuroendocrine and Adrenal	C80	8249	2018-01-19	25	DDR,OTH	m2C	NA	1	Combination	MRE11	Loss-of-function	Somatic	Deletion	DDR	No
P284	M	27	Neuroendocrine and Adrenal	C80	8249	2018-01-19	25	DDR,OTH	m2C	NA	1	Combination	PTEN	Loss-of-function	Somatic	Deletion	PAM	No
P284	M	27	Neuroendocrine and Adrenal	C80	8249	2018-01-19	25	DDR,OTH	m2C	NA	1	Combination	RAD18	Loss-of-function	Somatic	Deletion	DDR	No
P284	M	27	Neuroendocrine and Adrenal	C80	8249	2018-01-19	25	DDR,OTH	m2C	NA	1	Combination	RPA1	Loss-of-function	Somatic	Deletion	DDR	No
P284	M	27	Neuroendocrine and Adrenal	C80	8249	2018-01-19	25	DDR,OTH	m2C	NA	1	Combination	SBS3	Composite biomarker	Somatic	Mutational signature	DDR	No
P284	M	27	Neuroendocrine and Adrenal	C80	8249	2018-01-19	25	DDR,OTH	m2C	NA	1	Combination	SBS8	Composite biomarker	Somatic	Mutational signature	DDR	No
P284	M	27	Neuroendocrine and Adrenal	C80	8249	2018-01-19	25	DDR,OTH	m2C	NA	1	Combination	SETD2	Loss-of-function	Somatic	SNV/indel	OTH	No
P284	M	27	Neuroendocrine and Adrenal	C80	8249	2018-01-19	25	DDR,OTH	m2C	NA	1	Combination	SETD2	Loss-of-function	Somatic	Deletion	OTH	No
P284	M	27	Neuroendocrine and Adrenal	C80	8249	2018-01-19	25	DDR	m2C	NA	2	Single-agent	ATM	Loss-of-function	Somatic	Deletion	DDR	No
P284	M	27	Neuroendocrine and Adrenal	C80	8249	2018-01-19	25	DDR	m2C	NA	2	Single-agent	ATR	Loss-of-function	Somatic	Deletion	DDR	No
P284	M	27	Neuroendocrine and Adrenal	C80	8249	2018-01-19	25	DDR	m2C	NA	2	Single-agent	BRCA2	Loss-of-function	Somatic	Deletion	DDR	No
P284	M	27	Neuroendocrine and Adrenal	C80	8249	2018-01-19	25	DDR	m2C	NA	2	Single-agent	CHEK1	Loss-of-function	Somatic	Deletion	DDR	No
P284	M	27	Neuroendocrine and Adrenal	C80	8249	2018-01-19	25	DDR	m2C	NA	2	Single-agent	DDB1	Loss-of-function	Somatic	Deletion	DDR	No
P284	M	27	Neuroendocrine and Adrenal	C80	8249	2018-01-19	25	DDR	m2C	NA	2	Single-agent	ERCC5	Loss-of-function	Somatic	Deletion	DDR	No
P284	M	27	Neuroendocrine and Adrenal	C80	8249	2018-01-19	25	DDR	m2C	NA	2	Single-agent	ERCC6	Loss-of-function	Somatic	Deletion	DDR	No
P284	M	27	Neuroendocrine and Adrenal	C80	8249	2018-01-19	25	DDR	m2C	NA	2	Single-agent	FANCD2	Loss-of-function	Somatic	Deletion	DDR	No
P284	M	27	Neuroendocrine and Adrenal	C80	8249	2018-01-19	25	DDR	m2C	NA	2	Single-agent	HDAC2	Loss-of-function	Somatic	Deletion	DDR	No
P284	M	27	Neuroendocrine and Adrenal	C80	8249	2018-01-19	25	DDR	m2C	NA	2	Single-agent	HRD	Composite biomarker	Somatic	Positive	DDR	No
P284	M	27	Neuroendocrine and Adrenal	C80	8249	2018-01-19	25	DDR	m2C	NA	2	Single-agent	MRE11	Loss-of-function	Somatic	Deletion	DDR	No
P284	M	27	Neuroendocrine and Adrenal	C80	8249	2018-01-19	25	DDR	m2C	NA	2	Single-agent	PTEN	Loss-of-function	Somatic	Deletion	PAM	No
P284	M	27	Neuroendocrine and Adrenal	C80	8249	2018-01-19	25	DDR	m2C	NA	2	Single-agent	RAD18	Loss-of-function	Somatic	Deletion	DDR	No
P284	M	27	Neuroendocrine and Adrenal	C80	8249	2018-01-19	25	DDR	m2C	NA	2	Single-agent	RPA1	Loss-of-function	Somatic	Deletion	DDR	No
P284	M	27	Neuroendocrine and Adrenal	C80	8249	2018-01-19	25	DDR	m2C	NA	2	Single-agent	SBS3	Composite biomarker	Somatic	Mutational signature	DDR	No
P284	M	27	Neuroendocrine and Adrenal	C80	8249	2018-01-19	25	DDR	m2C	NA	2	Single-agent	SBS8	Composite biomarker	Somatic	Mutational signature	DDR	No
P284	M	27	Neuroendocrine and Adrenal	C80	8249	2018-01-19	25	DDR	m2C	NA	2	Single-agent	SETD2	Loss-of-function	Somatic	Deletion	OTH	No
P284	M	27	Neuroendocrine and Adrenal	C80	8249	2018-01-19	25	DDR	m2C	NA	2	Single-agent	SETD2	Loss-of-function	Somatic	SNV/indel	OTH	No
P284	M	27	Neuroendocrine and Adrenal	C80	8249	2018-01-19	25	CC	m3	IV-A	5	Single-agent	SETD2	Loss-of-function	Somatic	Deletion	OTH	No
P284	M	27	Neuroendocrine and Adrenal	C80	8249	2018-01-19	25	CC	m3	IV-A	5	Single-agent	SETD2	Loss-of-function	Somatic	SNV/indel	OTH	No
P284	M	27	Neuroendocrine and Adrenal	C80	8249	2018-01-19	25	TK	m3	IV-A	3	Single-agent	ARID1A	Loss-of-function	Somatic	SNV/indel	OTH	No
P284	M	27	Neuroendocrine and Adrenal	C80	8249	2018-01-19	25	TK	m3	IV-A	3	Single-agent	ARID1B	Loss-of-function	Somatic	Deletion	NA	No
P284	M	27	Neuroendocrine and Adrenal	C80	8249	2018-01-19	25	TK	m3	IV-A	3	Single-agent	ARID2	Loss-of-function	Somatic	SNV/indel	NA	No
P284	M	27	Neuroendocrine and Adrenal	C80	8249	2018-01-19	25	TK	m3	IV-A	3	Single-agent	NRG1	Gain-of-function	Somatic	Gain	TK	No
P284	M	27	Neuroendocrine and Adrenal	C80	8249	2018-01-19	25	OTH	m3	IV-A	4	Single-agent	ARID1A	Loss-of-function	Somatic	SNV/indel	OTH	No
P285	M	35	Colorectal	C20	8010	2017-07-28	38	IE,RME	m2C	NA	1	Combination	KRAS	Gain-of-function	Somatic	SNV/indel	RME	Yes
P285	M	35	Colorectal	C20	8010	2017-07-28	38	IE,RME	m3	IV-A	1	Combination	KRAS	Gain-of-function	Somatic	SNV/indel	RME	Yes
P285	M	35	Colorectal	C20	8010	2017-07-28	38	RME	m3	IV-A	1	Single-agent	KRAS	Gain-of-function	Somatic	SNV/indel	RME	Yes
P285	M	35	Colorectal	C20	8010	2017-07-28	38	RME	m3	IV-A	2	Single-agent	KRAS	Gain-of-function	Somatic	SNV/indel	RME	Yes
P285	M	35	Colorectal	C20	8010	2017-07-28	38	RME,OTH	m3	IV-A	2	Combination	KRAS	Gain-of-function	Somatic	SNV/indel	RME	Yes
P286	F	38	Colorectal	C18	8140	2018-07-06	133	IE,RME	m4	X	1	Combination	KRAS	Gain-of-function	Somatic	Gain	RME	Yes
P286	F	38	Colorectal	C18	8140	2018-07-06	133	IE,RME	m4	X	1	Combination	KRAS	Gain-of-function	Somatic	Overexpression	RME	Yes
P286	F	38	Colorectal	C18	8140	2018-07-06	133	IE,RME	m4	X	1	Combination	TMB	Composite biomarker	NA	Positive	IE	Yes
P286	F	38	Colorectal	C18	8140	2018-07-06	133	RME	m3	IV-A	2	Single-agent	KRAS	Gain-of-function	Somatic	Gain	RME	Yes
P286	F	38	Colorectal	C18	8140	2018-07-06	133	RME	m3	IV-A	2	Single-agent	KRAS	Gain-of-function	Somatic	Overexpression	RME	Yes
P286	F	38	Colorectal	C18	8140	2018-07-06	133	DDR	m3	IV-A	3	Single-agent	HRD	Composite biomarker	NA	Positive	DDR	Yes
P286	F	38	Colorectal	C18	8140	2018-07-06	133	DDR	m3	IV-A	3	Single-agent	SBS8	Composite biomarker	NA	Mutational signature	DDR	Yes
P287	F	42	Gynecologic	C53	8560	2018-11-09	152	IE	m2A	III-A	1	Single-agent	TMB	Composite biomarker	Somatic	Positive	IE	No
P287	F	42	Gynecologic	C53	8560	2018-11-09	152	TK	m2B	III-A	2	Single-agent	MET	Gain-of-function	Somatic	Gain	TK	No
P288	M	33	Other	C71	9440	2018-06-12	51	TK,CC	m1B	I-C	1	Combination	CDK4	Gain-of-function	Somatic	Overexpression	CC	Yes
P288	M	33	Other	C71	9440	2018-06-12	51	TK,CC	m1B	I-C	1	Combination	CDK4	Gain-of-function	Somatic	Gain	CC	Yes
P288	M	33	Other	C71	9440	2018-06-12	51	TK,CC	m1B	I-C	1	Combination	ERBB2	Gain-of-function	Somatic	Gain	TK	Yes
P288	M	33	Other	C71	9440	2018-06-12	51	TK,CC	m1B	I-C	1	Combination	ERBB2	Gain-of-function	Somatic	Overexpression	TK	Yes
P288	M	33	Other	C71	9440	2018-06-12	51	TK,CC	m1B	I-C	1	Combination	ERBB3	Gain-of-function	Somatic	Overexpression	TK	Yes
P288	M	33	Other	C71	9440	2018-06-12	51	IE	m3	IV-A	2	Single-agent	ERBB2	Gain-of-function	Somatic	Gain	TK	Yes
P288	M	33	Other	C71	9440	2018-06-12	51	IE	m3	IV-A	2	Single-agent	ERBB2	Gain-of-function	Somatic	Overexpression	TK	Yes
P288	M	33	Other	C71	9440	2018-06-12	51	TK	m2C	NA	3	Single-agent	EGFR	Gain-of-function	Somatic	Gain	TK	Yes
P288	M	33	Other	C71	9440	2018-06-12	51	OTH	m3	IV-A	4	Single-agent	MYC	Gain-of-function	Somatic	Gain	CC	Yes
P289	F	39	Upper Gastrointestinal	C16	8140	2017-07-21	3	OTH	m1B	II-A	1	Single-agent	CLDN18	Gain-of-function	Somatic	Overexpression	IE	Yes
P290	M	41	Neuroendocrine and Adrenal	C80	8246	2017-05-26	72	DDR	m3	IV-A	1	Single-agent	FANCA	Loss-of-function	Somatic	Deletion	DDR	Yes
P290	M	41	Neuroendocrine and Adrenal	C80	8246	2017-05-26	72	DDR	m3	IV-A	1	Single-agent	PALB2	Loss-of-function	Somatic	Deletion	DDR	Yes
P290	M	41	Neuroendocrine and Adrenal	C80	8246	2017-05-26	72	DDR	m3	IV-A	1	Single-agent	SBS3	Composite biomarker	Somatic	Mutational signature	DDR	Yes
P290	M	41	Neuroendocrine and Adrenal	C80	8246	2017-05-26	72	DDR	m3	IV-A	1	Single-agent	XRCC2	Loss-of-function	Somatic	Deletion	DDR	Yes
P290	M	41	Neuroendocrine and Adrenal	C80	8246	2017-05-26	72	IE	m2B	III-B	2	Single-agent	CTAG1B	Gain-of-function	Somatic	Overexpression	IE	Yes
P291	F	45	Hepatopancreaticobiliary	C78	8140	2016-12-09	37	TK	m2C	NA	1	Single-agent	BICC1	Gain-of-function	Somatic	Fusion	NA	Yes
P291	F	45	Hepatopancreaticobiliary	C78	8140	2016-12-09	37	TK	m2C	NA	1	Single-agent	BICC1	Gain-of-function	Somatic	Overexpression	NA	Yes
P291	F	45	Hepatopancreaticobiliary	C78	8140	2016-12-09	37	TK	m2C	NA	1	Single-agent	FGFR2	Gain-of-function	Somatic	Fusion	TK	Yes
P291	F	45	Hepatopancreaticobiliary	C78	8140	2016-12-09	37	TK	m2C	NA	1	Single-agent	FGFR2	Gain-of-function	Somatic	Overexpression	TK	Yes
P291	F	45	Hepatopancreaticobiliary	C78	8140	2016-12-09	37	TK	m2C	NA	1	Single-agent	FGFR3	Gain-of-function	Somatic	Overexpression	TK	Yes
P291	F	45	Hepatopancreaticobiliary	C78	8140	2016-12-09	37	TK	m2C	NA	1	Single-agent	FGFR4	Gain-of-function	Somatic	Overexpression	TK	Yes
P291	F	45	Hepatopancreaticobiliary	C78	8140	2016-12-09	37	OTH	m2B	IV-A	2	Single-agent	IDH2	Gain-of-function	Somatic	SNV/indel	OTH	Yes
P291	F	45	Hepatopancreaticobiliary	C78	8140	2016-12-09	37	DDR,OTH	m3	IV-A	3	Combination	BAP1	Loss-of-function	Somatic	SNV/indel	DDR	Yes
P291	F	45	Hepatopancreaticobiliary	C78	8140	2016-12-09	37	DDR,OTH	m3	IV-A	3	Combination	SBS3	Composite biomarker	Somatic	Mutational signature	DDR	Yes
P291	F	45	Hepatopancreaticobiliary	C78	8140	2016-12-09	37	DDR,OTH	m3	IV-A	3	Combination	SBS8	Composite biomarker	Somatic	Mutational signature	DDR	Yes
P291	F	45	Hepatopancreaticobiliary	C78	8140	2016-12-09	37	path	NA	NA	NA	NA	NA	NA	NA	NA	NA	Yes
P292	F	57	Leiomyosarcoma	C53	8890	2018-05-25	33	DDR,OTH	m3	IV-A	1	Combination	HRD	Composite biomarker	Somatic	Positive	DDR	Yes
P292	F	57	Leiomyosarcoma	C53	8890	2018-05-25	33	DDR,OTH	m3	IV-A	1	Combination	PARP1	Gain-of-function	Somatic	SNV/indel	DDR	Yes
P292	F	57	Leiomyosarcoma	C53	8890	2018-05-25	33	DDR,OTH	m3	IV-A	1	Combination	SBS3	Composite biomarker	Somatic	Mutational signature	DDR	Yes
P292	F	57	Leiomyosarcoma	C53	8890	2018-05-25	33	RME,RME	m3	X	2	Combination	RAF1	Gain-of-function	Somatic	Gain	RME	Yes
P292	F	57	Leiomyosarcoma	C53	8890	2018-05-25	33	RME,RME	m3	X	2	Combination	RAF1	Gain-of-function	Somatic	Overexpression	RME	Yes
P292	F	57	Leiomyosarcoma	C53	8890	2018-05-25	33	RME,RME	m3	X	2	Combination	RIT1	Gain-of-function	Somatic	Gain	RME	Yes
P292	F	57	Leiomyosarcoma	C53	8890	2018-05-25	33	RME,RME	m3	X	2	Combination	RIT1	Gain-of-function	Somatic	Overexpression	RME	Yes
P293	M	48	Soft Tissue Other	C49	8821	2017-11-17	3	OTH	m4	X	2	Single-agent	FOXL2	Gain-of-function	Somatic	Overexpression	DEV	Yes
P293	M	48	Soft Tissue Other	C49	8821	2017-11-17	3	TK	m4	X	2	Single-agent	FGF1	Gain-of-function	Somatic	Overexpression	TK	Yes
P293	M	48	Soft Tissue Other	C49	8821	2017-11-17	3	TK	m4	X	2	Single-agent	NTRK1	Gain-of-function	Somatic	Overexpression	TK	Yes
P293	M	48	Soft Tissue Other	C49	8821	2017-11-17	3	TK	m4	X	2	Single-agent	VEGFB	Gain-of-function	Somatic	Overexpression	TK	Yes
P294	M	53	Upper Gastrointestinal	C15	8140	2016-03-04	17	TK	m1A	I-A	1	Single-agent	ERBB2	Gain-of-function	Somatic	Gain	TK	Yes
P294	M	53	Upper Gastrointestinal	C15	8140	2016-03-04	17	NA	NA	NA	NA	NA	BRCA1	Loss-of-function	Germline	NA	DDR	Yes
P294	M	53	Upper Gastrointestinal	C15	8140	2016-05-27	156	TK	m1A	I-A	1	Single-agent	SBS3	Composite biomarker	Somatic	Mutational signature	DDR	Yes
P294	M	53	Upper Gastrointestinal	C15	8140	2016-05-27	156	DDR,DDR	m2B	III-A	2	Combination	FGFR4	Gain-of-function	Somatic	Overexpression	TK	Yes
P294	M	53	Upper Gastrointestinal	C15	8140	2016-05-27	156	TK	m4	X	3	Single-agent	SHH	Gain-of-function	Somatic	Overexpression	DEV	Yes
P294	M	53	Upper Gastrointestinal	C15	8140	2016-05-27	156	DEV	m4	X	4	Single-agent	NA	NA	NA	NA	NA	Yes
P295	M	55	Neuroendocrine and Adrenal	C74	8700	2017-04-21	36	TK	m2C	NA	1	Single-agent	RET	Gain-of-function	Somatic	Overexpression	TK	Yes
P295	M	55	Neuroendocrine and Adrenal	C74	8700	2017-04-21	36	TK	m3	IV-A	2	Single-agent	VHL	Loss-of-function	Somatic	SNV/indel	PAM	Yes
P295	M	55	Neuroendocrine and Adrenal	C74	8700	2017-04-21	36	RME	m4	IV-A	3	Single-agent	GNAS	Gain-of-function	Somatic	Overexpression	RME	Yes
P296	M	39	Soft Tissue Other	C47	9540	2016-04-08	73	TK	m3	IV-A	1	Single-agent	KIT	Gain-of-function	Somatic	Overexpression	TK	Yes
P296	M	39	Soft Tissue Other	C47	9540	2016-04-08	73	TK	m3	IV-A	1	Single-agent	KIT	Gain-of-function	Somatic	Gain	TK	Yes
P296	M	39	Soft Tissue Other	C47	9540	2016-04-08	73	TK	m3	IV-A	1	Single-agent	PDGFRA	Gain-of-function	Somatic	Overexpression	TK	Yes
P296	M	39	Soft Tissue Other	C47	9540	2016-04-08	73	TK	m3	IV-A	1	Single-agent	PDGFRA	Gain-of-function	Somatic	Gain	TK	Yes
P296	M	39	Soft Tissue Other	C47	9540	2016-04-08	73	CC	m2B	III-B	2	Single-agent	CDK4	Gain-of-function	Somatic	Overexpression	CC	Yes
P296	M	39	Soft Tissue Other	C47	9540	2016-04-08	73	CC	m2B	III-B	2	Single-agent	CDK4	Gain-of-function	Somatic	Gain	CC	Yes
P296	M	39	Soft Tissue Other	C47	9540	2016-04-08	73	DEV	m4	X	3	Single-agent	GLI1	Gain-of-function	Somatic	Overexpression	DEV	Yes
P297	F	35	Soft Tissue Other	C49	8822	2018-07-25	18	TK	m2A	IV-A	1	Single-agent	KIT	Gain-of-function	Somatic	Overexpression	TK	Yes
P297	F	35	Soft Tissue Other	C49	8822	2018-07-25	18	TK	m2A	IV-A	1	Single-agent	PDGFRA	Gain-of-function	Somatic	Overexpression	TK	Yes
P297	F	35	Soft Tissue Other	C49	8822	2018-07-25	18	TK	m2A	IV-A	1	Single-agent	PDGFRB	Gain-of-function	Somatic	Overexpression	TK	Yes
P297	F	35	Soft Tissue Other	C49	8822	2018-07-25	18	DEV	m1C	NA	2	Single-agent	APC	Loss-of-function	Germline	SNV/indel	DEV	Yes
P297	F	35	Soft Tissue Other	C49	8822	2018-07-25	18	DEV	m1C	NA	2	Single-agent	WIF1	Gain-of-function	Somatic	Overexpression	DEV	Yes
P297	F	35	Soft Tissue Other	C49	8822	2018-07-25	18	OTH	m4	X	2	Single-agent	FOXL2	Gain-of-function	Somatic	Overexpression	DEV	Yes
P297	F	35	Soft Tissue Other	C49	8822	2018-07-25	18	OTH	m1C	NA	2	Single-agent	NA	NA	NA	NA	NA	Yes
P297	F	35	Soft Tissue Other	C49	8822	2018-07-25	18	NA	NA	NA	NA	NA	APC	Loss-of-function	Germline	NA	DEV	Yes
P298	F	47	Leiomyosarcoma	C49	8890	2018-03-13	61	DDR	m2B	III-A	1	Single-agent	ATM	Loss-of-function	Somatic	Deletion	DDR	Yes
P298	F	47	Leiomyosarcoma	C49	8890	2018-03-13	61	DDR	m2B	III-A	1	Single-agent	ATM	Loss-of-function	Somatic	Underexpression	DDR	Yes
P298	F	47	Leiomyosarcoma	C49	8890	2018-03-13	61	DDR	m2B	III-A	1	Single-agent	NF1	Loss-of-function	Somatic	SNV/indel	RME	Yes
P298	F	47	Leiomyosarcoma	C49	8890	2018-03-13	61	DDR	m2B	III-A	1	Single-agent	PTEN	Loss-of-function	Somatic	Deletion	PAM	Yes
P298	F	47	Leiomyosarcoma	C49	8890	2018-03-13	61	DDR	m2B	III-A	1	Single-agent	PTEN	Loss-of-function	Somatic	Underexpression	PAM	Yes
P298	F	47	Leiomyosarcoma	C49	8890	2018-03-13	61	DDR	m2B	III-A	1	Single-agent	SBS3	Composite biomarker	Somatic	Mutational signature	DDR	Yes
P298	F	47	Leiomyosarcoma	C49	8890	2018-03-13	61	DDR	m2B	III-A	1	Single-agent	SBS8	Composite biomarker	Somatic	Mutational signature	DDR	Yes
P298	F	47	Leiomyosarcoma	C49	8890	2018-03-13	61	PAM	m2B	III-A	2	Single-agent	NF1	Loss-of-function	Somatic	SNV/indel	RME	Yes
P298	F	47	Leiomyosarcoma	C49	8890	2018-03-13	61	PAM	m2B	III-A	2	Single-agent	PTEN	Loss-of-function	Somatic	Underexpression	PAM	Yes
P298	F	47	Leiomyosarcoma	C49	8890	2018-03-13	61	PAM	m2B	III-A	2	Single-agent	PTEN	Loss-of-function	Somatic	Deletion	PAM	Yes
P299	M	45	Soft Tissue Other	C49	9757	2018-10-12	8	IE	m2B	III-A	1	Single-agent	CD274	Gain-of-function	Somatic	Overexpression	IE	Yes
P299	M	45	Soft Tissue Other	C49	9757	2018-10-12	8	IE	m2B	III-A	1	Single-agent	CTLA4	Gain-of-function	Somatic	Overexpression	IE	Yes
P299	M	45	Soft Tissue Other	C49	9757	2018-10-12	8	IE	m2B	III-A	1	Single-agent	LAG3	Gain-of-function	Somatic	Overexpression	IE	Yes
P299	M	45	Soft Tissue Other	C49	9757	2018-10-12	8	IE	m2B	III-A	1	Single-agent	PDCD1LG2	Gain-of-function	Somatic	Overexpression	IE	Yes
P299	M	45	Soft Tissue Other	C49	9757	2018-10-12	8	IE	m2B	III-A	1	Single-agent	TMB	Composite biomarker	Somatic	Negative	IE	Yes
P299	M	45	Soft Tissue Other	C49	9757	2018-10-12	8	RME	m2B	III-A	2	Single-agent	GAST	Loss-of-function	Somatic	Fusion	NA	Yes
P299	M	45	Soft Tissue Other	C49	9757	2018-10-12	8	RME	m2B	III-A	2	Single-agent	NF2	Loss-of-function	Somatic	Fusion	PAM	Yes
P299	M	45	Soft Tissue Other	C49	9757	2018-10-12	8	PAM	m2C	NA	3	Single-agent	GAST	Loss-of-function	Somatic	Fusion	NA	Yes
P299	M	45	Soft Tissue Other	C49	9757	2018-10-12	8	PAM	m2C	NA	3	Single-agent	NF2	Loss-of-function	Somatic	Fusion	PAM	Yes
P300	F	49	Gynecologic	C53	8033	2018-08-31	317	IE,DDR	m2B	III-A	1	Combination	CD274	Gain-of-function	Somatic	Gain	IE	Yes
P300	F	49	Gynecologic	C53	8033	2018-08-31	317	IE,DDR	m2B	III-A	1	Combination	CD274	Gain-of-function	Somatic	Overexpression	IE	Yes
P300	F	49	Gynecologic	C53	8033	2018-08-31	317	IE,DDR	m2B	III-A	1	Combination	HRAS	Gain-of-function	Somatic	Gain	RME	Yes
P300	F	49	Gynecologic	C53	8033	2018-08-31	317	IE,DDR	m2B	III-A	1	Combination	HRAS	Gain-of-function	Somatic	Overexpression	RME	Yes
P300	F	49	Gynecologic	C53	8033	2018-08-31	317	IE,DDR	m2B	III-A	1	Combination	KRAS	Gain-of-function	Somatic	Gain	RME	Yes
P300	F	49	Gynecologic	C53	8033	2018-08-31	317	IE,DDR	m2B	III-A	1	Combination	KRAS	Gain-of-function	Somatic	Overexpression	RME	Yes
P300	F	49	Gynecologic	C53	8033	2018-08-31	317	IE,DDR	m2B	III-A	1	Combination	MAP2K2	Gain-of-function	Somatic	Gain	RME	Yes
P300	F	49	Gynecologic	C53	8033	2018-08-31	317	IE,DDR	m2B	III-A	1	Combination	MAP2K2	Gain-of-function	Somatic	Overexpression	RME	Yes
P300	F	49	Gynecologic	C53	8033	2018-08-31	317	IE,DDR	m2B	III-A	1	Combination	PDCD1LG2	Gain-of-function	Somatic	Gain	IE	Yes
P300	F	49	Gynecologic	C53	8033	2018-08-31	317	IE,DDR	m2B	III-A	1	Combination	PDCD1LG2	Gain-of-function	Somatic	Overexpression	IE	Yes
P300	F	49	Gynecologic	C53	8033	2018-08-31	317	IE,DDR	m2B	III-A	1	Combination	SBS13	Composite biomarker	Somatic	Mutational signature	NA	Yes
P300	F	49	Gynecologic	C53	8033	2018-08-31	317	IE,DDR	m2B	III-A	1	Combination	SBS2	Composite biomarker	Somatic	Mutational signature	NA	Yes
P300	F	49	Gynecologic	C53	8033	2018-08-31	317	IE,DDR	m2B	III-A	1	Combination	TMB	Composite biomarker	Somatic	Positive	IE	Yes
P300	F	49	Gynecologic	C53	8033	2018-08-31	317	IE,DDR	m2B	III-A	2	Combination	CD274	Gain-of-function	Somatic	Gain	IE	Yes
P300	F	49	Gynecologic	C53	8033	2018-08-31	317	IE,DDR	m2B	III-A	2	Combination	CD274	Gain-of-function	Somatic	Overexpression	IE	Yes
P300	F	49	Gynecologic	C53	8033	2018-08-31	317	IE,DDR	m2B	III-A	2	Combination	CHEK1	Loss-of-function	Somatic	Deletion	DDR	Yes
P300	F	49	Gynecologic	C53	8033	2018-08-31	317	IE,DDR	m2B	III-A	2	Combination	HRD	Composite biomarker	Somatic	Positive	DDR	Yes
P300	F	49	Gynecologic	C53	8033	2018-08-31	317	IE,DDR	m2B	III-A	2	Combination	PALB2	Loss-of-function	Somatic	Deletion	DDR	Yes
P300	F	49	Gynecologic	C53	8033	2018-08-31	317	IE,DDR	m2B	III-A	2	Combination	PDCD1LG2	Gain-of-function	Somatic	Gain	IE	Yes
P300	F	49	Gynecologic	C53	8033	2018-08-31	317	IE,DDR	m2B	III-A	2	Combination	PDCD1LG2	Gain-of-function	Somatic	Overexpression	IE	Yes
P300	F	49	Gynecologic	C53	8033	2018-08-31	317	IE,DDR	m2B	III-A	2	Combination	RAD51	Loss-of-function	Somatic	Deletion	DDR	Yes
P300	F	49	Gynecologic	C53	8033	2018-08-31	317	IE,DDR	m2B	III-A	2	Combination	RAD51AP1	Loss-of-function	Somatic	Deletion	DDR	Yes
P300	F	49	Gynecologic	C53	8033	2018-08-31	317	IE,DDR	m2B	III-A	2	Combination	RAD54L	Loss-of-function	Somatic	Deletion	DDR	Yes
P300	F	49	Gynecologic	C53	8033	2018-08-31	317	IE,DDR	m2B	III-A	2	Combination	SBS13	Composite biomarker	Somatic	Mutational signature	NA	Yes
P300	F	49	Gynecologic	C53	8033	2018-08-31	317	IE,DDR	m2B	III-A	2	Combination	SBS2	Composite biomarker	Somatic	Mutational signature	NA	Yes
P300	F	49	Gynecologic	C53	8033	2018-08-31	317	IE,DDR	m2B	III-A	2	Combination	STK36	Loss-of-function	Somatic	Deletion	DEV	Yes
P300	F	49	Gynecologic	C53	8033	2018-08-31	317	IE,DDR	m2B	III-A	2	Combination	TMB	Composite biomarker	Somatic	Positive	IE	Yes
P300	F	49	Gynecologic	C53	8033	2018-08-31	317	IE,DDR	m2B	III-A	2	Combination	TSSK3	Loss-of-function	Somatic	Deletion	DEV	Yes
P300	F	49	Gynecologic	C53	8033	2018-08-31	317	IE,DDR	m2B	III-A	2	Combination	XAB2	Loss-of-function	Somatic	Deletion	DDR	Yes
P300	F	49	Gynecologic	C53	8033	2018-08-31	317	DDR,OTH	m3	IV-A	3	Combination	CHEK1	Loss-of-function	Somatic	Deletion	DDR	Yes
P300	F	49	Gynecologic	C53	8033	2018-08-31	317	DDR,OTH	m3	IV-A	3	Combination	HRD	Composite biomarker	Somatic	Positive	DDR	Yes
P300	F	49	Gynecologic	C53	8033	2018-08-31	317	DDR,OTH	m3	IV-A	3	Combination	PALB2	Loss-of-function	Somatic	Deletion	DDR	Yes
P300	F	49	Gynecologic	C53	8033	2018-08-31	317	DDR,OTH	m3	IV-A	3	Combination	RAD51	Loss-of-function	Somatic	Deletion	DDR	Yes
P300	F	49	Gynecologic	C53	8033	2018-08-31	317	DDR,OTH	m3	IV-A	3	Combination	RAD51AP1	Loss-of-function	Somatic	Deletion	DDR	Yes
P300	F	49	Gynecologic	C53	8033	2018-08-31	317	DDR,OTH	m3	IV-A	3	Combination	RAD54L	Loss-of-function	Somatic	Deletion	DDR	Yes
P300	F	49	Gynecologic	C53	8033	2018-08-31	317	DDR,OTH	m3	IV-A	3	Combination	STK36	Loss-of-function	Somatic	Deletion	DEV	Yes
P300	F	49	Gynecologic	C53	8033	2018-08-31	317	DDR,OTH	m3	IV-A	3	Combination	TSSK3	Loss-of-function	Somatic	Deletion	DEV	Yes
P300	F	49	Gynecologic	C53	8033	2018-08-31	317	DDR,OTH	m3	IV-A	3	Combination	XAB2	Loss-of-function	Somatic	Deletion	DDR	Yes
P301	M	31	Ewing/PNET	C49	9260	2018-08-03	14	OTH	m3	IV-A	1	Single-agent	EWSR1	Gain-of-function	Somatic	Fusion	OTH	Yes
P301	M	31	Ewing/PNET	C49	9260	2018-08-03	14	OTH	m3	IV-A	1	Single-agent	FLI1	Gain-of-function	Somatic	Fusion	OTH	Yes
P301	M	31	Ewing/PNET	C49	9260	2018-08-03	14	DDR,OTH	m2B	III-A	2	Combination	SBS8	Composite biomarker	NA	Mutational signature	DDR	Yes
P301	M	31	Ewing/PNET	C49	9260	2018-08-03	14	DDR,OTH	m2B	III-A	2	Combination	SLFN11	Gain-of-function	Somatic	Overexpression	DDR	Yes
P301	M	31	Ewing/PNET	C49	9260	2018-08-03	14	DDR,OTH	m3	IV-A	3	Combination	SBS8	Composite biomarker	NA	Mutational signature	DDR	Yes
P301	M	31	Ewing/PNET	C49	9260	2018-08-03	14	DDR,OTH	m3	IV-A	3	Combination	SLFN11	Gain-of-function	Somatic	Overexpression	DDR	Yes
P301	M	31	Ewing/PNET	C49	9260	2018-08-03	14	TK	m3	IV-A	4	Single-agent	ALK	Gain-of-function	Somatic	Overexpression	TK	Yes
P302	F	32	Breast	C50	8500	2017-04-07	89	PAM	m1B	II-A	1	Single-agent	PTEN	Loss-of-function	Somatic	Deletion	PAM	Yes
P302	F	32	Breast	C50	8500	2017-04-07	89	PAM	m1B	II-A	1	Single-agent	TSC2	Loss-of-function	Somatic	Deletion	PAM	Yes
P302	F	32	Breast	C50	8500	2017-04-07	89	TK	m2B	III-A	3	Single-agent	PTPRF	Gain-of-function	Somatic	Overexpression	TK	Yes
P302	F	32	Breast	C50	8500	2017-04-07	89	DDR	m4	IV-B	2	Single-agent	ATM	Loss-of-function	Germline	SNV/indel	DDR	Yes
P302	F	32	Breast	C50	8500	2017-04-07	89	DDR	m4	IV-B	2	Single-agent	NBN	Loss-of-function	Germline	SNV/indel	DDR	Yes
P302	F	32	Breast	C50	8500	2017-04-07	89	DDR	m4	IV-B	2	Single-agent	SBS3	Composite biomarker	Germline	Mutational signature	DDR	Yes
P303	F	36	Urologic	C64	8290	2018-06-26	5	PAM	m2B	III-A	1	Single-agent	TSC1	Loss-of-function	Germline	SNV/indel	PAM	No
P303	F	36	Urologic	C64	8290	2018-06-26	5	NA	NA	NA	NA	NA	TSC1	Loss-of-function	Germline	NA	PAM	No
P304	F	47	Leiomyosarcoma	C49	8890	2018-08-03	47	PAM	m1B	II-B	1	Single-agent	AKT3	Gain-of-function	Somatic	SNV/indel	PAM	Yes
P304	F	47	Leiomyosarcoma	C49	8890	2018-08-03	47	PAM	m1B	II-B	1	Single-agent	PIK3R1	Loss-of-function	Somatic	Overexpression	PAM	Yes
P304	F	47	Leiomyosarcoma	C49	8890	2018-08-03	47	PAM	m1B	II-B	1	Single-agent	RPTOR	Gain-of-function	Somatic	Overexpression	PAM	Yes
P304	F	47	Leiomyosarcoma	C49	8890	2018-08-03	47	PAM,OTH	m2C	NA	2	Combination	AKT3	Gain-of-function	Somatic	SNV/indel	PAM	Yes
P304	F	47	Leiomyosarcoma	C49	8890	2018-08-03	47	PAM,OTH	m2C	NA	2	Combination	PIK3R1	Loss-of-function	Somatic	Overexpression	PAM	Yes
P304	F	47	Leiomyosarcoma	C49	8890	2018-08-03	47	PAM,OTH	m2C	NA	2	Combination	RPTOR	Gain-of-function	Somatic	Overexpression	PAM	Yes
P304	F	47	Leiomyosarcoma	C49	8890	2018-08-03	47	PAM,TK	m2C	NA	3	Combination	PTPRJ	Loss-of-function	Somatic	Underexpression	TK	Yes
P304	F	47	Leiomyosarcoma	C49	8890	2018-08-03	47	PAM,TK	m2C	NA	3	Combination	VEGFA	Gain-of-function	Somatic	Overexpression	TK	Yes
P304	F	47	Leiomyosarcoma	C49	8890	2018-08-03	47	DDR,OTH	m2C	NA	4	Combination	DDB1	Loss-of-function	Somatic	SNV/indel	DDR	Yes
P304	F	47	Leiomyosarcoma	C49	8890	2018-08-03	47	DDR,OTH	m2C	NA	4	Combination	FANCF	Loss-of-function	Somatic	Deletion	DDR	Yes
P304	F	47	Leiomyosarcoma	C49	8890	2018-08-03	47	DDR,OTH	m2C	NA	4	Combination	FANCF	Loss-of-function	Somatic	Underexpression	DDR	Yes
P304	F	47	Leiomyosarcoma	C49	8890	2018-08-03	47	DDR,OTH	m2C	NA	4	Combination	HRD	Composite biomarker	Somatic	Positive	DDR	Yes
P304	F	47	Leiomyosarcoma	C49	8890	2018-08-03	47	DDR,OTH	m2C	NA	4	Combination	PNKP	Loss-of-function	Somatic	Underexpression	DDR	Yes
P304	F	47	Leiomyosarcoma	C49	8890	2018-08-03	47	DDR,OTH	m2C	NA	4	Combination	PNKP	Loss-of-function	Somatic	Deletion	DDR	Yes
P304	F	47	Leiomyosarcoma	C49	8890	2018-08-03	47	DDR,OTH	m2C	NA	4	Combination	STK36	Loss-of-function	Somatic	Deletion	DEV	Yes
P304	F	47	Leiomyosarcoma	C49	8890	2018-08-03	47	DDR,OTH	m2C	NA	4	Combination	STK36	Loss-of-function	Somatic	Underexpression	DEV	Yes
P305	M	53	Head and Neck	C30	8410	2017-10-27	109	PAM	m2B	III-A	1	Single-agent	AKT2	Gain-of-function	Somatic	Gain	PAM	Yes
P305	M	53	Head and Neck	C30	8410	2017-10-27	109	PAM	m2B	III-A	1	Single-agent	AKT2	Gain-of-function	Somatic	Overexpression	PAM	Yes
P305	M	53	Head and Neck	C30	8410	2017-10-27	109	PAM	m2B	III-A	1	Single-agent	PIK3CA	Gain-of-function	Somatic	Gain	PAM	Yes
P305	M	53	Head and Neck	C30	8410	2017-10-27	109	PAM	m2B	III-A	1	Single-agent	PIK3CA	Gain-of-function	Somatic	Overexpression	PAM	Yes
P305	M	53	Head and Neck	C30	8410	2017-10-27	109	OTH	m3	IV-A	2	Single-agent	MYCL	Gain-of-function	Somatic	Overexpression	CC	Yes
P305	M	53	Head and Neck	C30	8410	2017-10-27	109	OTH	m3	IV-A	2	Single-agent	MYCL	Gain-of-function	Somatic	Gain	CC	Yes
P305	M	53	Head and Neck	C30	8410	2017-10-27	109	TK	m4	X	3	Single-agent	EGFR	Gain-of-function	Somatic	SNV/indel	TK	Yes
P306	M	40	Hepatopancreaticobiliary	C25	8140	2015-06-19	57	NA	NA	NA	NA	NA	NA	NA	NA	NA	NA	Yes
P307	M	24	Bone	C40	9180	2018-08-24	110	NA	NA	NA	NA	NA	NA	NA	NA	NA	NA	No
P308	M	44	Hepatopancreaticobiliary	C23	8480	2017-05-12	95	DDR	m2B	III-A	1	Single-agent	SBS3	Composite biomarker	NA	Mutational signature	DDR	Yes
P308	M	44	Hepatopancreaticobiliary	C23	8480	2017-05-12	95	CC	m2C	NA	2	Single-agent	CDKN2A	Loss-of-function	Somatic	Underexpression	CC	Yes
P308	M	44	Hepatopancreaticobiliary	C23	8480	2017-05-12	95	CC	m2C	NA	2	Single-agent	CDKN2A	Loss-of-function	Somatic	Deletion	CC	Yes
P308	M	44	Hepatopancreaticobiliary	C23	8480	2017-05-12	95	CC	m2C	NA	2	Single-agent	CDKN2B	Loss-of-function	Somatic	Deletion	CC	Yes
P308	M	44	Hepatopancreaticobiliary	C23	8480	2017-05-12	95	TK	m3	IV-A	3	Single-agent	ERBB3	Gain-of-function	Somatic	Overexpression	TK	Yes
P309	F	46	Colorectal	C18	8140	2016-07-22	85	RME,TK	m3	IV-A	1	Combination	FGF3	Gain-of-function	Somatic	Overexpression	TK	Yes
P309	F	46	Colorectal	C18	8140	2016-07-22	85	RME,TK	m3	IV-A	1	Combination	FGFR4	Gain-of-function	Somatic	Overexpression	TK	Yes
P309	F	46	Colorectal	C18	8140	2016-07-22	85	RME,TK	m3	IV-A	1	Combination	KRAS	Gain-of-function	Somatic	SNV/indel	RME	Yes
P309	F	46	Colorectal	C18	8140	2016-07-22	85	RME,TK	m3	IV-A	2	Combination	FGF3	Gain-of-function	Somatic	Overexpression	TK	Yes
P309	F	46	Colorectal	C18	8140	2016-07-22	85	RME,TK	m3	IV-A	2	Combination	FGFR4	Gain-of-function	Somatic	Overexpression	TK	Yes
P309	F	46	Colorectal	C18	8140	2016-07-22	85	RME,TK	m3	IV-A	2	Combination	KRAS	Gain-of-function	Somatic	SNV/indel	RME	Yes
P309	F	46	Colorectal	C18	8140	2016-07-22	85	PAM	m2C	NA	3	Single-agent	FBXW7	Loss-of-function	Somatic	SNV/indel	PAM	Yes
P309	F	46	Colorectal	C18	8140	2016-07-22	85	PAM,TK	m4	X	4	Combination	FBXW7	Loss-of-function	Somatic	SNV/indel	PAM	Yes
P310	F	53	Melanoma	C43	8720	2013-08-02	207	RME,RME	m1A	I-A	1	Combination	BRAF	Gain-of-function	Somatic	SNV/indel	RME	No
P310	F	53	Melanoma	C43	8720	2013-08-02	207	TK	m3	IV-A	2	Single-agent	ERBB4	Gain-of-function	Somatic	SNV/indel	TK	No
P311	F	48	Colorectal	C18	8010	2018-02-27	70	RME	m4	X	1	Single-agent	NF1	Loss-of-function	Somatic	SNV/indel	RME	Yes
P311	F	48	Colorectal	C18	8010	2018-02-27	70	TK	m2B	III-A	2	Single-agent	FGFR3	Gain-of-function	Somatic	Overexpression	TK	Yes
P311	F	48	Colorectal	C18	8010	2018-02-27	70	TK	m2B	III-A	2	Single-agent	FGFR4	Gain-of-function	Somatic	Overexpression	TK	Yes
P311	F	48	Colorectal	C18	8010	2018-02-27	70	TK	m4	X	3	Single-agent	PTK2	Gain-of-function	Somatic	SNV/indel	NA	Yes
P311	F	48	Colorectal	C18	8010	2018-02-27	70	NA	NA	NA	NA	NA	CHEK2	Loss-of-function	Germline	NA	DDR	Yes
P312	M	58	Head and Neck	C30	8140	2016-06-24	23	DDR	m3	IV-A	1	Single-agent	FANCD2	Loss-of-function	Somatic	Deletion	DDR	No
P312	M	58	Head and Neck	C30	8140	2016-06-24	23	DDR	m3	IV-A	1	Single-agent	RAD18	Loss-of-function	Somatic	Deletion	DDR	No
P312	M	58	Head and Neck	C30	8140	2016-06-24	23	DDR	m3	IV-A	1	Single-agent	SBS3	Composite biomarker	Somatic	Mutational signature	DDR	No
P312	M	58	Head and Neck	C30	8140	2016-06-24	23	NA	NA	NA	NA	NA	BAP1	Loss-of-function	Germline	NA	DDR	No
P313	M	39	Upper Gastrointestinal	C16	8140	2018-02-16	79	TK,OTH	m3	IV-A	1	Combination	FANCI	Loss-of-function	Germline	SNV/indel	DDR	Yes
P313	M	39	Upper Gastrointestinal	C16	8140	2018-02-16	79	TK,OTH	m3	IV-A	1	Combination	SBS8	Composite biomarker	NA	Mutational signature	DDR	Yes
P313	M	39	Upper Gastrointestinal	C16	8140	2018-02-16	79	IE,IE	m3	IV-A	2	Combination	CD274	Gain-of-function	Somatic	Overexpression	IE	Yes
P313	M	39	Upper Gastrointestinal	C16	8140	2018-02-16	79	IE,IE	m3	IV-A	2	Combination	CTLA4	Gain-of-function	Somatic	Overexpression	IE	Yes
P313	M	39	Upper Gastrointestinal	C16	8140	2018-02-16	79	IE,IE	m3	IV-A	2	Combination	LAG3	Gain-of-function	Somatic	Overexpression	IE	Yes
P313	M	39	Upper Gastrointestinal	C16	8140	2018-02-16	79	IE,IE	m3	IV-A	2	Combination	MAGEA3	Gain-of-function	Somatic	Overexpression	IE	Yes
P313	M	39	Upper Gastrointestinal	C16	8140	2018-02-16	79	IE,IE	m3	IV-A	2	Combination	TMB	Composite biomarker	Somatic	Positive	IE	Yes
P313	M	39	Upper Gastrointestinal	C16	8140	2018-02-16	79	IE,DDR	m4	X	3	Combination	FANCI	Loss-of-function	Germline	SNV/indel	DDR	Yes
P313	M	39	Upper Gastrointestinal	C16	8140	2018-02-16	79	IE,DDR	m4	X	3	Combination	SBS8	Composite biomarker	NA	Mutational signature	DDR	Yes
P313	M	39	Upper Gastrointestinal	C16	8140	2018-02-16	79	IE,DDR	m4	X	3	Combination	TMB	Composite biomarker	NA	Positive	IE	Yes
P313	M	39	Upper Gastrointestinal	C16	8140	2018-02-16	79	DDR,OTH	m4	X	4	Combination	FANCI	Loss-of-function	Germline	SNV/indel	DDR	Yes
P313	M	39	Upper Gastrointestinal	C16	8140	2018-02-16	79	DDR,OTH	m4	X	4	Combination	SBS8	Composite biomarker	NA	Mutational signature	DDR	Yes
P313	M	39	Upper Gastrointestinal	C16	8140	2018-02-16	79	DDR	m4	X	5	Single-agent	FANCI	Loss-of-function	Germline	SNV/indel	DDR	Yes
P313	M	39	Upper Gastrointestinal	C16	8140	2018-02-16	79	DDR	m4	X	5	Single-agent	SBS8	Composite biomarker	NA	Mutational signature	DDR	Yes
P314	F	46	Leiomyosarcoma	C74	8890	2017-05-26	58	DDR	m3	IV-A	1	Single-agent	BRCA2	Loss-of-function	Somatic	Deletion	DDR	Yes
P314	F	46	Leiomyosarcoma	C74	8890	2017-05-26	58	DDR	m3	IV-A	1	Single-agent	FANCA	Loss-of-function	Somatic	Deletion	DDR	Yes
P314	F	46	Leiomyosarcoma	C74	8890	2017-05-26	58	DDR	m3	IV-A	1	Single-agent	HDAC2	Loss-of-function	Somatic	Deletion	DDR	Yes
P314	F	46	Leiomyosarcoma	C74	8890	2017-05-26	58	DDR	m3	IV-A	1	Single-agent	RAD51C	Loss-of-function	Somatic	Deletion	DDR	Yes
P314	F	46	Leiomyosarcoma	C74	8890	2017-05-26	58	DDR	m3	IV-A	1	Single-agent	SBS3	Composite biomarker	Somatic	Mutational signature	DDR	Yes
P314	F	46	Leiomyosarcoma	C74	8890	2017-05-26	58	TK	m4	X	2	Single-agent	FGF2	Gain-of-function	Somatic	Fusion	TK	Yes
P314	F	46	Leiomyosarcoma	C74	8890	2017-05-26	58	TK	m4	X	2	Single-agent	FGF2	Gain-of-function	Somatic	Overexpression	TK	Yes
P314	F	46	Leiomyosarcoma	C74	8890	2017-05-26	58	TK	m4	X	2	Single-agent	KIAA1109	Gain-of-function	Somatic	Fusion	NA	Yes
P314	F	46	Leiomyosarcoma	C74	8890	2017-05-26	58	TK	m4	X	2	Single-agent	KIAA1109	Gain-of-function	Somatic	Overexpression	NA	Yes
P315	M	75	Colorectal	C18	8140	2014-03-28	95	NA	NA	NA	NA	NA	NA	NA	NA	NA	NA	No
P316	M	46	Liposarcoma	C48	8858	2017-11-21	56	CC	m1B	II-A	1	Single-agent	CDK4	Gain-of-function	Somatic	Gain	CC	Yes
P316	M	46	Liposarcoma	C48	8858	2017-11-21	56	CC	m1B	II-A	1	Single-agent	CDK4	Gain-of-function	Somatic	Overexpression	CC	Yes
P316	M	46	Liposarcoma	C48	8858	2017-11-21	56	CC	m2C	NA	2	Single-agent	MDM2	Gain-of-function	Somatic	Gain	CC	Yes
P316	M	46	Liposarcoma	C48	8858	2017-11-21	56	CC	m2C	NA	2	Single-agent	MDM2	Gain-of-function	Somatic	Overexpression	CC	Yes
P316	M	46	Liposarcoma	C48	8858	2017-11-21	56	DDR	m3	IV-A	3	Single-agent	BRCA2	Loss-of-function	Somatic	Underexpression	DDR	Yes
P316	M	46	Liposarcoma	C48	8858	2017-11-21	56	DDR	m3	IV-A	3	Single-agent	BRCA2	Loss-of-function	Somatic	Deletion	DDR	Yes
P316	M	46	Liposarcoma	C48	8858	2017-11-21	56	DDR	m3	IV-A	3	Single-agent	FANCI	Loss-of-function	Somatic	SNV/indel	DDR	Yes
P316	M	46	Liposarcoma	C48	8858	2017-11-21	56	DDR	m3	IV-A	3	Single-agent	RAD51B	Loss-of-function	Somatic	Underexpression	DDR	Yes
[truncated: 6,035 more rows]

## Sheet: Supplementary Table S6
Supplementary Table S6. NCT/DKTK evidence levels
Level of evidence	Basis for classification	Tissue context	Description of classification
m1A	Clinical data	Same histopathologic entity	The predictive value of the biomarker or clinical effectiveness of the corresponding drug in a molecularly stratified cohort was demonstrated in a prospective study or meta-analysis in the same tumor type.
m1B	Clinical data	Same histopathologic entity	The predictive value of the biomarker or clinical effectiveness of the drug in a molecularly stratified cohort was demonstrated in a retrospective cohort or case-control study in the same tumor type.
m1C	Clinical data	Same histopathologic entity	A case study or single unusual responder indicates that the biomarker is associated with response to the corresponding drug in the same tumor type.
m2A	Clinical data	Different histopathologic entity	The predictive value of the biomarker or clinical effectiveness of the corresponding drug in a molecularly stratified cohort was demonstrated in a prospective study or meta-analysis in a different tumor type.
m2B	Clinical data	Different histopathologic entity	The predictive value of the biomarker or clinical effectiveness of the drug in a molecularly stratified cohort was demonstrated in a retrospective cohort or case-control study in a different tumor type.
m2C	Clinical data	Different histopathologic entity	A case study or single unusual responder indicates that the biomarker is associated with response to the corresponding drug in a different tumor type.
m3	Preclinical data	Not applicable	Preclinical data demonstrate that the biomarker predicts response to a specific drug, supported by a scientific rationale.
m4	Biological rationale	Not applicable	A biological rationale exists that associates the biomarker with altered activity of cellular pathways/processes or drug sensitivity without direct clinical or preclinical evidence for a response to the drug.
Additional modifiers
is	In situ data and studies on patient material (e.g., immunohistochemistry, fluoresecence in situ hybridization) support the biomarker and the level of evidence.
iv	In vitro data support the biomarker and the level of evidence.
Z	Drug is approved for use with the specific biomarker.
R	Biomarker predicts resistance to the drug.

## Sheet: Supplementary Table S7
Supplementary Table S7. Cases with exceptional clinical benefit
Patient	PFS1 (days)	PFS2 (days)	BR1	BR2	PFSr	mPFSr	Subcohort	Treatment basket	Drug(s)	NCT/DKTK evidence level	ESCAT tier	Biomarker(s)
P0025	44	181	PD	SD	4.11	2.98	Soft Tissue Other	TK	Pazopanib	m3	IV-A	PDGFRA and KIT amplification and overexpression
P0102	56	153	PD	PR	2.73	2.52	Hepatopancreaticobiliary	TK	Pertuzumab and erlotinib	m4	X	NRG1 fusion
P0177	38	155	NA	PD	4.08	2.55	Ewing/PNET	TK	Imatinib	m4	X	KIT mutation and overexpression
P0277	92	548	PD	PR	5.96	7.93	NSCLC	RME	Trametinib	m3	IV-A	BRAF non-V600 mutation
P0314	58	93	PD	PD	1.60	1.53	Leiomyosarcoma	TK	Pazopanib	m4	X	FGF2 fusion and overexpression
P0342	30	115	PD	NA	3.83	1.89	Other	IE	Nivolumab	m4	X	PDCD1 overexpression
P0457	49	160	MR	PR	3.27	2.63	Unknown Primary	OTH	Leuprorelin	m4	X	AR and FOXA1 overexpression
P0511	92	402	PR	PR	4.37	7.93	Synovial Sarcoma	TK	Pazopanib	m4	X	RET, ALK, FGFR3, and PDGFA overexpression
P0575	61	220	PD	PR	3.61	11.97	Breast	TK	Eribulin, bevacizumab, and pertuzumab	m4	X	NRG1 mutation and overexpression
P0589	17	56	PD	PD	3.29	0.92	GIST	TK	Pazopanib	m3	IV-A	FGFR1, FGFR2, FGF1, and FGF2 overexpression
P0678	14	31	PD	PD	2.21	0.51	NSCLC	IE	Nivolumab	m4	X	CTLA4 overexpression
P0692	120	412	PD	NA	3.43	6.08	Soft Tissue Other	TK	Pazopanib	m4	X	PDGFB, VEGFB, and FLT4 overexpression
P0701	62	115	PD	PD	1.85	1.85	Leiomyosarcoma	TK	Pazopanib	m3	IV-A	PDGFRA amplification and overexpression, VEGFB overexpression
P0766	184	258	SD	PR	1.40	3.97	Neuroendocrine and Adrenal	TK	Sunitinib	m3	IV-A	FGFR3 amplification and overexpression, RET overexpression
P0779	89	237	PD	SD	2.66	8.20	Unknown Primary	TK	Dasatinib	m3	IV-A	ARID1A fusion
P0821	122	274	PD	SD	2.25	5.98	GIST	TK	Nilotinib	m3	IV-A	KIT mutation
P0843	104	162	SD	SD	1.56	1.56	Soft Tissue Other	TK	Pazopanib	m3	IV-A	PTPRB and PTPN11 mutation
P0858	61	93	SD	NA	1.52	1.52	Soft Tissue Other	PAM	Everolimus and nintedanib	m4	X	FGFR1 overexpression, SETD2 mutation
P0867	97	134	PD	SD	1.38	1.38	Gynecologic	OTH	Letrozole	m4	X	FOXL2 mutation
P0918	122	165	NA	NA	1.35	1.35	Colorectal	TK	Capecitabine and lapatinib	m3	IV-A	ERBB2 amplification and overexpression
P0928	62	189	PD	SD	3.05	11.77	GIST	TK	Ponatinib	m3	III-B	KIT mutation
P0941	48	72	PD	PD	1.50	1.18	GIST	TK	Pazopanib	m3	IV-A	FGFR1, FGF4, FGF3, and FGF2 overexpression
P0981	72	183	NA	SD	2.54	10.14	Upper Gastrointestinal	TK	Crizotinib followed by alectinib	m3	IV-A	ALK transcript resulting from de novo alternative transcription initiation site in ALK intron 19
P1000	55	86	SD	PD	1.56	1.41	Soft Tissue Other	TK	Pazopanib	m4	X	FGF2 overexpression
P1068	31	365	NA	SD	11.77	12.00	GIST	TK	Nilotinib	m3	IV-A	KIT mutation
P1070	153	371	SD	SD	2.42	4.77	Unknown Primary	DDR	Olaparib	m3	IV-A	ATM, CHEK1, RAD54L, FANCC, and FANCD2 deletion
P1194	214	279	NA	SD	1.30	3.41	Hepatopancreaticobiliary	TK	Erlotinib and trastuzumab	m4	IV-A	NRG1 fusion
P1209	55	90	PD	NA	1.64	1.48	Leiomyosarcoma	DDR	Olaparib and trabectedin	m3	IV-A	RAD18 deletion and underexpression, BAP1 deletion, PTEN underexpression, single-base substitution signature 3
P1264	21	31	PD	SD	1.48	0.51	Urologic	RME	Sorafenib	m3	IV-A	BRAF and HRAS mutation
P1267	66	180	NA	NA	2.73	2.73	Bone	RME	Sorafenib and everolimus	m4	IV-A	NF1 fusion
Abbreviations
PFS1, progression-free survival interval associated with the last prior systemic therapy
PFS2, progression-free survival interval associated with molecularly informed therapy
BR1, best response associated with the last prior systemic therapy
BR2, best response associated with molecularly informed therapy
PFSr, progression-free survival ratio
mPFSr, modified progression-free survival ratio
NCT, National Center for Tumor Diseases
DKTK, German Cancer Consortium
ESCAT, European Society for Medical Oncology Scale for Clinical Actionability of Molecular Targets
PR, partial remission
SD, stable disease
PD, progressive disease
NA, not available
GIST, gastrointestinal stromal tumor
PNET, primitive neuroectodermal tumor
TK, tyrosine kinases
RME, RAF-MEK-ERK
DDR, DNA damage repair
OTH, other
